# Supplementary material
Source: Research Square preprint supplement (doi:10.21203/rs.3.rs-9872059/v1)

## checkCIF/PLATON report

Structure factors have been supplied for datablock(s) a

THIS REPORT IS FOR GUIDANCE ONLY. IF USED AS PART OF A REVIEW PROCEDURE FOR PUBLICATION, IT SHOULD NOT REPLACE THE EXPERTISE OF AN EXPERIENCED CRYSTALLOGRAPHIC REFEREE.

No syntax errors found.      CIF dictionary      Interpreting this report

### Datablock: a

---

Bond precision:      C-C = 0.0129 Å      Wavelength=1.54178

Cell:                      a=23.2078(19)      b=23.5946(19)      c=29.377(3)  
                                    alpha=90              beta=90              gamma=90

Temperature:              217 K

|                        | Calculated                                           | Reported                                      |
|------------------------|------------------------------------------------------|-----------------------------------------------|
| Volume                 | 16086(2)                                             | 16086(2)                                      |
| Space group            | C m c a                                              | C m c e                                       |
| Hall group             | -C 2bc 2                                             | -C 2bc 2                                      |
| Moiety formula         | C106 H126 Co8 O42 S8, C H4<br>O, 2(H3 O) [+ solvent] | C106 H126 Co8 O42 S8,<br>0.5(C2 H8 O2), H6 O2 |
| Sum formula            | C107 H136 Co8 O45 S8 [+<br>solvent]                  | C107 H136 Co8 O45 S8                          |
| Mr                     | 2870.08                                              | 2870.07                                       |
| Dx, g cm <sup>-3</sup> | 1.185                                                | 1.185                                         |
| Z                      | 4                                                    | 4                                             |
| Mu (mm <sup>-1</sup> ) | 7.817                                                | 7.817                                         |
| F000                   | 5928.0                                               | 5928.0                                        |
| F000'                  | 5880.48                                              |                                               |
| h, k, lmax             | 28, 28, 35                                           | 27, 28, 33                                    |
| Nref                   | 7614                                                 | 7448                                          |
| Tmin, Tmax             | 0.450, 0.535                                         | 0.488, 0.753                                  |
| Tmin'                  | 0.340                                                |                                               |

Correction method= # Reported T Limits: Tmin=0.488 Tmax=0.753  
AbsCorr = MULTI-SCAN

Data completeness= 0.978

Theta(max)= 68.557

R(reflections)= 0.1131( 3855)

wR2(reflections)=  
0.3338( 7448)

S = 1.165

Npar= 502

---

The following ALERTS were generated. Each ALERT has the format  
**test-name\_ALERT\_alert-type\_alert-level.**  
Click on the hyperlinks for more details of the test.

---

### ● Alert level C

RINTA01\_ALERT\_3\_C The value of Rint is greater than 0.12  
Rint given 0.152

PLAT020\_ALERT\_3\_C The Value of Rint is Greater Than 0.12 ..... 0.152 Report

PLAT082\_ALERT\_2\_C High R1 Value ..... 0.11 Report

PLAT084\_ALERT\_3\_C High wR2 Value (i.e. > 0.25) ..... 0.33 Report

PLAT230\_ALERT\_2\_C Hirshfeld Test Diff for O3 --C2 . 5.2 s.u.

PLAT260\_ALERT\_2\_C Large Average Ueq of Residue Including O16 0.103 Check

PLAT260\_ALERT\_2\_C Large Average Ueq of Residue Including O14 0.172 Check

PLAT260\_ALERT\_2\_C Large Average Ueq of Residue Including O15 0.201 Check

PLAT341\_ALERT\_3\_C Low Bond Precision on C-C Bonds ..... 0.01294 Ang.

PLAT905\_ALERT\_3\_C Negative K value in the Analysis of Variance ... -1.352 Report

PLAT911\_ALERT\_3\_C Missing FCF Refl Between Thmin & STh/L= 0.600 71 Report

2 0 0, 4 0 0, 6 0 0, 0 2 0, 26 10 0, 14 24 0,  
1 1 1, 26 10 1, 15 23 1, 14 24 1, 13 25 1, 26 10 2,  
15 23 2, 14 24 2, 2 4 3, 15 23 3, 14 24 3, 4 0 4,  
3 3 4, 15 23 4, 14 24 4, 2 2 5, 15 23 5, 14 24 5,  
15 23 6, 15 23 7, 13 23 10, 12 24 10, 13 23 11, 13 23 12,  
( 41 More Missing: see the .ckf listing file)

PLAT913\_ALERT\_3\_C Missing # of Very Strong Reflections in FCF .... 4 Note

2 0 0, 0 2 0, 1 1 1, 3 3 4,

PLAT918\_ALERT\_3\_C Reflection(s) with I(obs) much Smaller I(calc) . 2 Check

PLAT973\_ALERT\_2\_C Check Calcd Positive Resid. Density on Co3 1.39 eA-3

PLAT973\_ALERT\_2\_C Check Calcd Positive Resid. Density on Co2 1.03 eA-3

PLAT975\_ALERT\_2\_C Check Calcd Resid. Dens. 0.97Ang From O16 . 1.00 eA-3

PLAT975\_ALERT\_2\_C Check Calcd Resid. Dens. 1.02Ang From O15 . 0.59 eA-3

PLAT975\_ALERT\_2\_C Check Calcd Resid. Dens. 1.04Ang From O16 . 0.51 eA-3

PLAT977\_ALERT\_2\_C Check Negative Difference Density on H21A . -0.45 eA-3

---

### ● Alert level G

PLAT002\_ALERT\_2\_G Number of Distance or Angle Restraints on AtSite 16 Note

PLAT003\_ALERT\_2\_G Number of Uiso or U(i,j) Restrained non-H-Atoms 34 Report

PLAT007\_ALERT\_5\_G Number of Unrefined Donor-H Atoms ..... 6 Report

H14C H14A H14B H15A H15B H15C

PLAT042\_ALERT\_1\_G Calc. and Reported MoietyFormula Strings Differ Please Check

Calc: C106 H126 Co8 O42 S8, C H4 O, 2(H3 O)  
Rep.: C106 H126 Co8 O42 S8, 0.5(C2 H8 O2), H6 O2

PLAT072\_ALERT\_2\_G SHELXL First Parameter in WGHT Unusually Large 0.16 Report

PLAT083\_ALERT\_2\_G SHELXL Second Parameter in WGHT Unusually Large 22.00 Why ?

PLAT175\_ALERT\_4\_G The CIF-Embedded .res File Contains SAME Records 2 Report

PLAT178\_ALERT\_4\_G The CIF-Embedded .res File Contains SIMU Records 3 Report

PLAT186\_ALERT\_4\_G The CIF-Embedded .res File Contains ISOR Records 2 Report

PLAT188\_ALERT\_3\_G A Non-default SIMU Restraint Value has been used 0.0100 Report

PLAT188\_ALERT\_3\_G A Non-default SIMU Restraint Value has been used 0.0100 Report

PLAT188\_ALERT\_3\_G A Non-default SIMU Restraint Value has been used 0.0100 Report

|                   |                                                             |        |        |
|-------------------|-------------------------------------------------------------|--------|--------|
| PLAT189_ALERT_3_G | A Non-default SAME Restraint Value for First Par            | 0.0100 | Report |
| PLAT189_ALERT_3_G | A Non-default SAME Restraint Value for SecondPar            | 0.0200 | Report |
| PLAT189_ALERT_3_G | A Non-default SAME Restraint Value for First Par            | 0.0100 | Report |
| PLAT189_ALERT_3_G | A Non-default SAME Restraint Value for SecondPar            | 0.0200 | Report |
| PLAT230_ALERT_2_G | Hirshfeld Test Diff for O9 --C21 .                          | 5.8    | s.u.   |
| PLAT299_ALERT_4_G | Atom Site Occupancy Constrained at .....                    | 0.5    | Check  |
|                   | C21 H21A H21B H21C O16 C28 O14 H14C                         |        |        |
|                   | O15                                                         |        |        |
| PLAT300_ALERT_4_G | Atom Site Occupancy of H16A Constrained at                  | 0.25   | Check  |
| PLAT300_ALERT_4_G | Atom Site Occupancy of H28A Constrained at                  | 0.25   | Check  |
| PLAT300_ALERT_4_G | Atom Site Occupancy of H28B Constrained at                  | 0.25   | Check  |
| PLAT300_ALERT_4_G | Atom Site Occupancy of H28C Constrained at                  | 0.25   | Check  |
| PLAT300_ALERT_4_G | Atom Site Occupancy of H14A Constrained at                  | 0.25   | Check  |
| PLAT300_ALERT_4_G | Atom Site Occupancy of H14B Constrained at                  | 0.25   | Check  |
| PLAT300_ALERT_4_G | Atom Site Occupancy of H15A Constrained at                  | 0.25   | Check  |
| PLAT300_ALERT_4_G | Atom Site Occupancy of H15B Constrained at                  | 0.25   | Check  |
| PLAT300_ALERT_4_G | Atom Site Occupancy of H15C Constrained at                  | 0.25   | Check  |
| PLAT301_ALERT_3_G | Main Residue Disorder .....(Resd 1)                         | 21%    | Note   |
| PLAT302_ALERT_4_G | Anion/Solvent/Minor-Residue Disorder (Resd 2)               | 100%   | Note   |
| PLAT302_ALERT_4_G | Anion/Solvent/Minor-Residue Disorder (Resd 3)               | 100%   | Note   |
| PLAT302_ALERT_4_G | Anion/Solvent/Minor-Residue Disorder (Resd 4)               | 100%   | Note   |
| PLAT412_ALERT_2_G | Short Intra XH3 .. XHn H6 ..H8AB .                          | 1.96   | Ang.   |
|                   | x,y,z =                                                     | 1_555  | Check  |
| PLAT412_ALERT_2_G | Short Intra XH3 .. XHn H16 ..H19A .                         | 2.09   | Ang.   |
|                   | x,y,z =                                                     | 1_555  | Check  |
| PLAT415_ALERT_2_G | Short Inter D-H..H-X H23A ..H14B .                          | 2.00   | Ang.   |
|                   | 1-x,y,z =                                                   | 11_655 | Check  |
| PLAT606_ALERT_4_G | Solvent Accessible VOID(S) in Crystal Structure             |        | ! Info |
| PLAT720_ALERT_4_G | Number of Unusual/Non-Standard Labels .....                 | 6      | Note   |
|                   | H8AA H8AB H8AC H9AA H9AB H9AC                               |        |        |
| PLAT779_ALERT_4_G | Suspect or Irrelevant (Bond) Angle(s) in CIF ...            | 15.60  | Deg.   |
|                   | H16A -O16 -H16A 1_555 1_555 11_655 .....                    | # 235  | Check  |
| PLAT779_ALERT_4_G | Suspect or Irrelevant (Bond) Angle(s) in CIF ...            | 27.90  | Deg.   |
|                   | H14A -O14 -H14A 1_555 1_555 11_655 .....                    | # 268  | Check  |
| PLAT779_ALERT_4_G | Suspect or Irrelevant (Bond) Angle(s) in CIF ...            | 31.40  | Deg.   |
|                   | H15A -O15 -H15C 1_555 1_555 11_655 .....                    | # 281  | Check  |
| PLAT789_ALERT_4_G | Atoms with Negative _atom_site_disorder_group #             | 7      | Check  |
| PLAT822_ALERT_4_G | CIF-embedded .res Contains Negative PART Numbers            | 2      | Check  |
| PLAT860_ALERT_3_G | Number of Least-Squares Restraints .....                    | 324    | Note   |
| PLAT868_ALERT_4_G | ALERTS Due to the Use of _smtbx_masks Suppressed            |        | ! Info |
| PLAT912_ALERT_4_G | Missing # of FCF Reflections Above STh/L= 0.600             | 56     | Note   |
| PLAT933_ALERT_2_G | Number of HKL-OMIT Records in Embedded .res File            | 2      | Note   |
|                   | 2 2 5, 2 4 3,                                               |        |        |
| PLAT952_ALERT_5_G | Calculated (ThMax) and CIF-Reported Lmax Differ.            | 2      | Units  |
| PLAT958_ALERT_1_G | Calculated (ThMax) and Actual (FCF) Lmax Differ.            | 2      | Units  |
| PLAT969_ALERT_5_G | The 'Henn et al.' R-Factor-gap value .....                  | 2.832  | Note   |
|                   | Predicted wR2: Based on SigI**2 11.79 or SHELX Weight 28.64 |        |        |
| PLAT978_ALERT_2_G | Number C-C Bonds with Positive Residual Density.            | 0      | Info   |

---

0 **ALERT level A** = Most likely a serious problem - resolve or explain  
0 **ALERT level B** = A potentially serious problem, consider carefully  
19 **ALERT level C** = Check. Ensure it is not caused by an omission or oversight  
49 **ALERT level G** = General information/check it is not something unexpected

2 ALERT type 1 CIF construction/syntax error, inconsistent or missing data

21 ALERT type 2 Indicator that the structure model may be wrong or deficient  
17 ALERT type 3 Indicator that the structure quality may be low  
25 ALERT type 4 Improvement, methodology, query or suggestion  
3 ALERT type 5 Informative message, check

---

---

It is advisable to attempt to resolve as many as possible of the alerts in all categories. Often the minor alerts point to easily fixed oversights, errors and omissions in your CIF or refinement strategy, so attention to these fine details can be worthwhile. In order to resolve some of the more serious problems it may be necessary to carry out additional measurements or structure refinements. However, the purpose of your study may justify the reported deviations and the more serious of these should normally be commented upon in the discussion or experimental section of a paper or in the "special\_details" fields of the CIF. checkCIF was carefully designed to identify outliers and unusual parameters, but every test has its limitations and alerts that are not important in a particular case may appear. Conversely, the absence of alerts does not guarantee there are no aspects of the results needing attention. It is up to the individual to critically assess their own results and, if necessary, seek expert advice.

#### **Publication of your CIF in IUCr journals**

A basic structural check has been run on your CIF. These basic checks will be run on all CIFs submitted for publication in IUCr journals (*Acta Crystallographica*, *Journal of Applied Crystallography*, *Journal of Synchrotron Radiation*); however, if you intend to submit to *Acta Crystallographica Section C* or *E* or *IUCrData*, you should make sure that full publication checks are run on the final version of your CIF prior to submission.

#### **Publication of your CIF in other journals**

Please refer to the *Notes for Authors* of the relevant journal for any special instructions relating to CIF submission.

---

**PLATON version of 04/06/2025; check.def file version of 30/05/2025**

Datablock a - ellipsoid plot

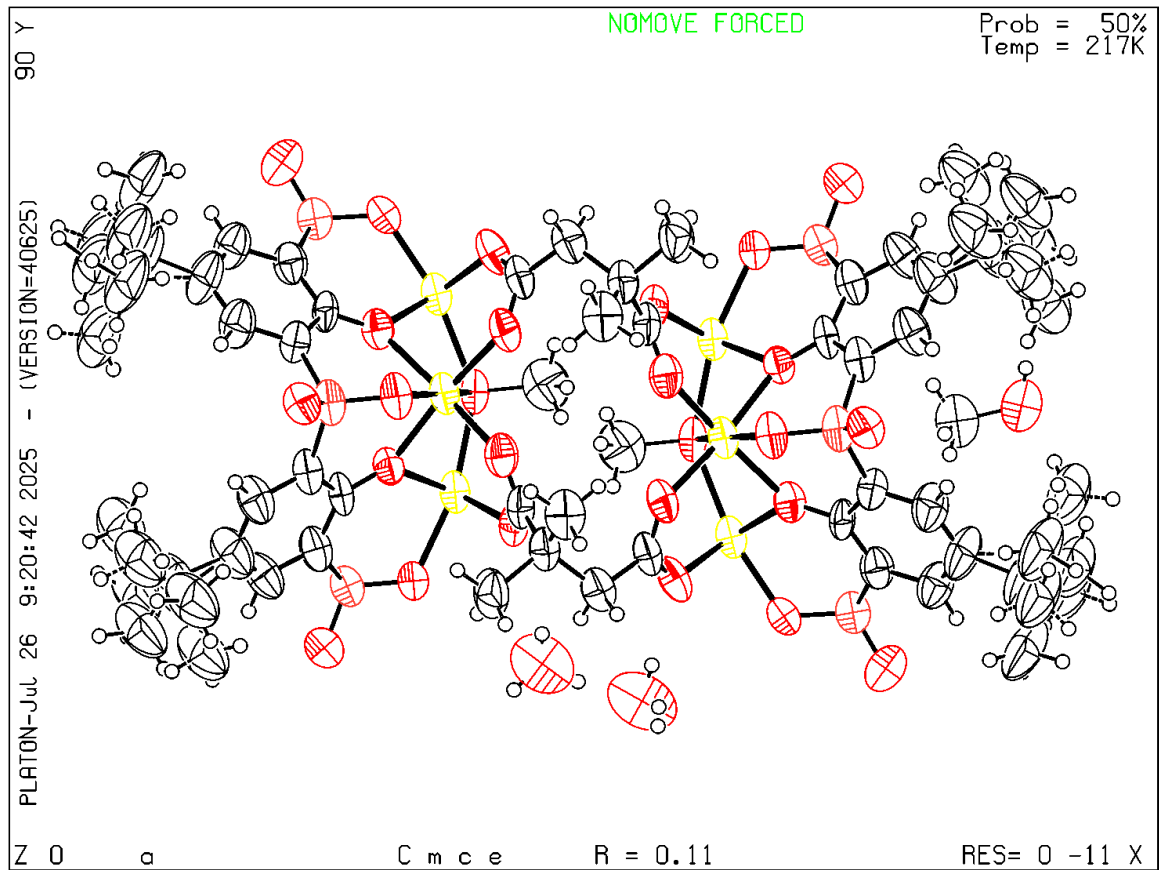

Supplement: Supplementary file 3 [file 5fe5236e29cd2508321a9a11.pdf]
