# Supplementary material
Source: Research Square preprint supplement (doi:10.21203/rs.3.rs-9872059/v1)

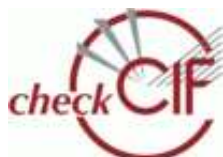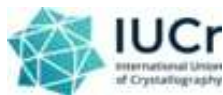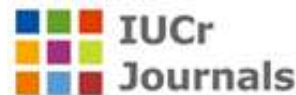

## checkCIF/PLATON report

Structure factors have been supplied for datablock(s) 260117ha\_z1493210\_0m

THIS REPORT IS FOR GUIDANCE ONLY. IF USED AS PART OF A REVIEW PROCEDURE FOR PUBLICATION, IT SHOULD NOT REPLACE THE EXPERTISE OF AN EXPERIENCED CRYSTALLOGRAPHIC REFEREE.

No syntax errors found.      CIF dictionary      Interpreting this report

### Datablock: 260117ha\_z1493210\_0m

---

|                        |                                               |                                         |                |
|------------------------|-----------------------------------------------|-----------------------------------------|----------------|
| Bond precision:        | C-C = 0.0117 Å                                | Wavelength=1.54178                      |                |
| Cell:                  | a=16.2763 (3)                                 | b=16.2763 (3)                           | c=31.0684 (11) |
|                        | alpha=90                                      | beta=90                                 | gamma=90       |
| Temperature:           | 193 K                                         |                                         |                |
|                        | Calculated                                    | Reported                                |                |
| Volume                 | 8230.6 (4)                                    | 8230.6 (4)                              |                |
| Space group            | I 4/m                                         | I4/m                                    |                |
| Hall group             | -I 4                                          | -I 4                                    |                |
| Moiety formula         | C120 H120 Co8 O42 S8, 4 (C2 H8 N) [+ solvent] | 0.5 (C120 H120 Co8 O42 S8), 2 (C2 H8 N) |                |
| Sum formula            | C128 H152 Co8 N4 O42 S8 [+ solvent]           | C64 H76 Co4 N2 O21 S4                   |                |
| Mr                     | 3146.46                                       | 1573.22                                 |                |
| Dx, g cm <sup>-3</sup> | 1.270                                         | 1.270                                   |                |
| Z                      | 2                                             | 4                                       |                |
| Mu (mm <sup>-1</sup> ) | 7.679                                         | 7.679                                   |                |
| F000                   | 3256.0                                        | 3256.0                                  |                |
| F000'                  | 3232.81                                       |                                         |                |
| h, k, lmax             | 19, 19, 37                                    | 19, 17, 37                              |                |
| Nref                   | 3871                                          | 3836                                    |                |
| Tmin, Tmax             | 0.424, 0.541                                  | 0.616, 0.753                            |                |
| Tmin'                  | 0.320                                         |                                         |                |



|                   |                                                            |          |        |        |
|-------------------|------------------------------------------------------------|----------|--------|--------|
| PLAT174_ALERT_4_G | The CIF-Embedded .res File Contains FLAT Records           |          | 1      | Report |
| PLAT175_ALERT_4_G | The CIF-Embedded .res File Contains SAME Records           |          | 1      | Report |
| PLAT176_ALERT_4_G | The CIF-Embedded .res File Contains SADI Records           |          | 2      | Report |
| PLAT178_ALERT_4_G | The CIF-Embedded .res File Contains SIMU Records           |          | 3      | Report |
| PLAT186_ALERT_4_G | The CIF-Embedded .res File Contains ISOR Records           |          | 1      | Report |
| PLAT188_ALERT_3_G | A Non-default SIMU Restraint Value has been used           |          | 0.0100 | Report |
| PLAT188_ALERT_3_G | A Non-default SIMU Restraint Value has been used           |          | 0.0100 | Report |
| PLAT188_ALERT_3_G | A Non-default SIMU Restraint Value has been used           |          | 0.0100 | Report |
| PLAT189_ALERT_3_G | A Non-default SAME Restraint Value for First Par           |          | 0.0100 | Report |
| PLAT189_ALERT_3_G | A Non-default SAME Restraint Value for SecondPar           |          | 0.0200 | Report |
| PLAT299_ALERT_4_G | Atom Site Occupancy Constrained at .....                   |          | 0.5    | Check  |
|                   | O4 O5 O6 O7 C11 C12 C13 C14                                |          |        |        |
|                   | C15 C16 C17 C18 C19 C20 H12A H12B                          |          |        |        |
|                   | H13 H16 H17 H18 H19 H20 N1 C21                             |          |        |        |
|                   | C22 H1A H1B H21A H21B H21C H22A H22B                       |          |        |        |
|                   | H22C                                                       |          |        |        |
| PLAT301_ALERT_3_G | Main Residue Disorder .....                                | (Resd 1) | 49%    | Note   |
| PLAT302_ALERT_4_G | Anion/Solvent/Minor-Residue Disorder (Resd 2)              |          | 100%   | Note   |
| PLAT304_ALERT_4_G | Non-Integer Number of Atoms in .....                       | (Resd 2) | 5.50   | Check  |
| PLAT412_ALERT_2_G | Short Intra XH3 .. XHn H3 ..H8C .                          |          | 2.04   | Ang.   |
|                   | x, y, z =                                                  |          | 1_555  | Check  |
| PLAT605_ALERT_4_G | Largest Solvent Accessible VOID in the Structure           |          | 576    | A**3   |
| PLAT720_ALERT_4_G | Number of Unusual/Non-Standard Labels .....                |          | 6      | Note   |
|                   | H8AA H8AB H8AC H9AA H9AB H9AC                              |          |        |        |
| PLAT789_ALERT_4_G | Atoms with Negative _atom_site_disorder_group #            |          | 33     | Check  |
| PLAT811_ALERT_5_G | No ADDSYM Analysis: Too Many Excluded Atoms ....           |          | !      | Info   |
| PLAT822_ALERT_4_G | CIF-embedded .res Contains Negative PART Numbers           |          | 1      | Check  |
| PLAT860_ALERT_3_G | Number of Least-Squares Restraints .....                   |          | 270    | Note   |
| PLAT868_ALERT_4_G | ALERTS Due to the Use of _smtbx_masks Suppressed           |          | !      | Info   |
| PLAT912_ALERT_4_G | Missing # of FCF Reflections Above STh/L= 0.600            |          | 4      | Note   |
| PLAT913_ALERT_3_G | Missing # of Very Strong Reflections in FCF ....           |          | 3      | Note   |
|                   | 0 1 1, 0 3 3, 0 0 8,                                       |          |        |        |
| PLAT941_ALERT_3_G | Average HKL Measurement Multiplicity .....                 |          | 4.7    | Low    |
| PLAT951_ALERT_5_G | Calculated (ThMax) and CIF-Reported Kmax Differ            |          | 2      | Units  |
| PLAT969_ALERT_5_G | The 'Henn et al.' R-Factor-gap value .....                 |          | 7.079  | Note   |
|                   | Predicted wR2: Based on SigI**2 4.87 or SHELX Weight 30.20 |          |        |        |
| PLAT978_ALERT_2_G | Number C-C Bonds with Positive Residual Density.           |          | 2      | Info   |

---

0 **ALERT level A** = Most likely a serious problem - resolve or explain  
0 **ALERT level B** = A potentially serious problem, consider carefully  
15 **ALERT level C** = Check. Ensure it is not caused by an omission or oversight  
37 **ALERT level G** = General information/check it is not something unexpected

3 ALERT type 1 CIF construction/syntax error, inconsistent or missing data  
16 ALERT type 2 Indicator that the structure model may be wrong or deficient  
13 ALERT type 3 Indicator that the structure quality may be low  
16 ALERT type 4 Improvement, methodology, query or suggestion  
4 ALERT type 5 Informative message, check

---

It is advisable to attempt to resolve as many as possible of the alerts in all categories. Often the minor alerts point to easily fixed oversights, errors and omissions in your CIF or refinement strategy, so attention to these fine details can be worthwhile. It is up to the individual to critically assess their own results and, if necessary, seek expert advice.

**PLATON version of 26/09/2025; check.def file version of 20/09/2025**

Datablock 260117ha\_z1493210\_0m - ellipsoid plot

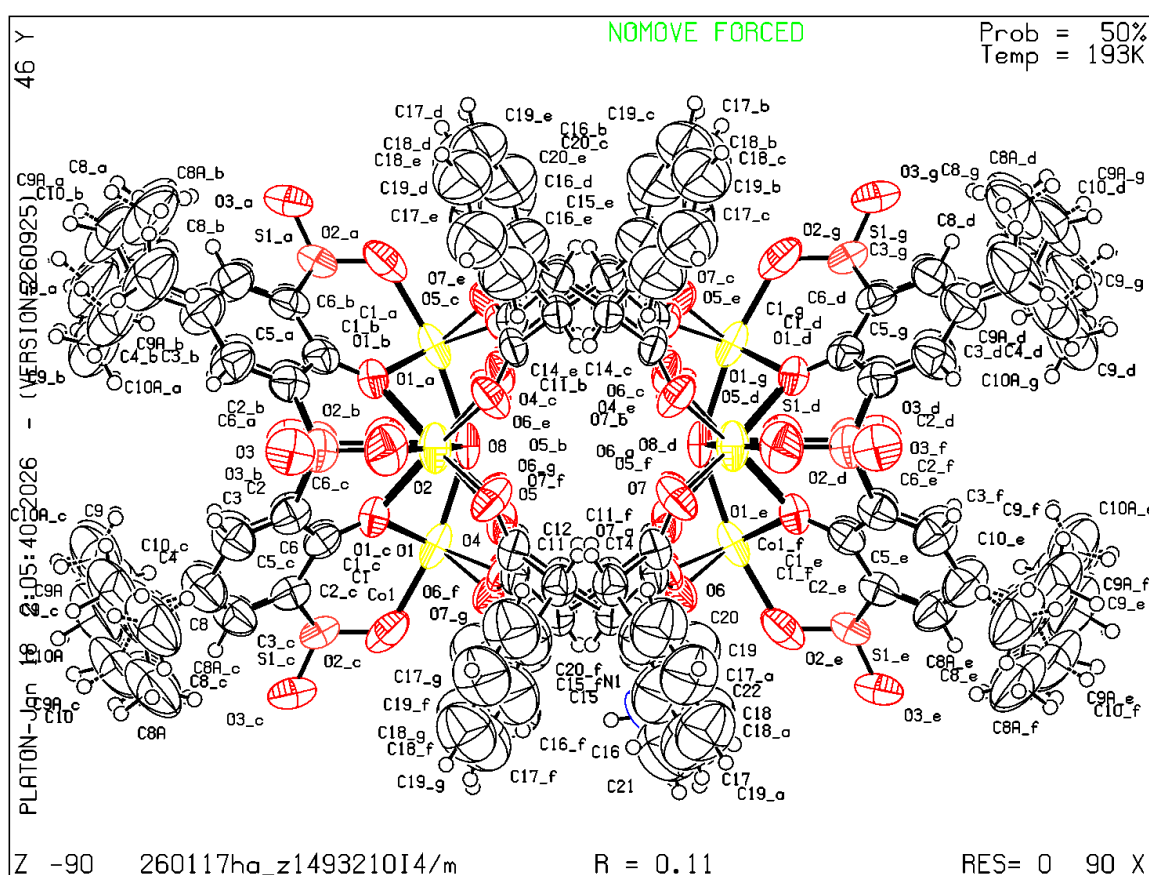

Supplement: Supplementary file 5 [file 7b40e7c02c81e0dbcf641470.pdf]
