# Supplementary material
Source: Research Square preprint supplement (doi:10.21203/rs.3.rs-9872059/v1)
Supplement: Supplementary file 1 [file 0f80954650a9da28773ab6dd.docx]

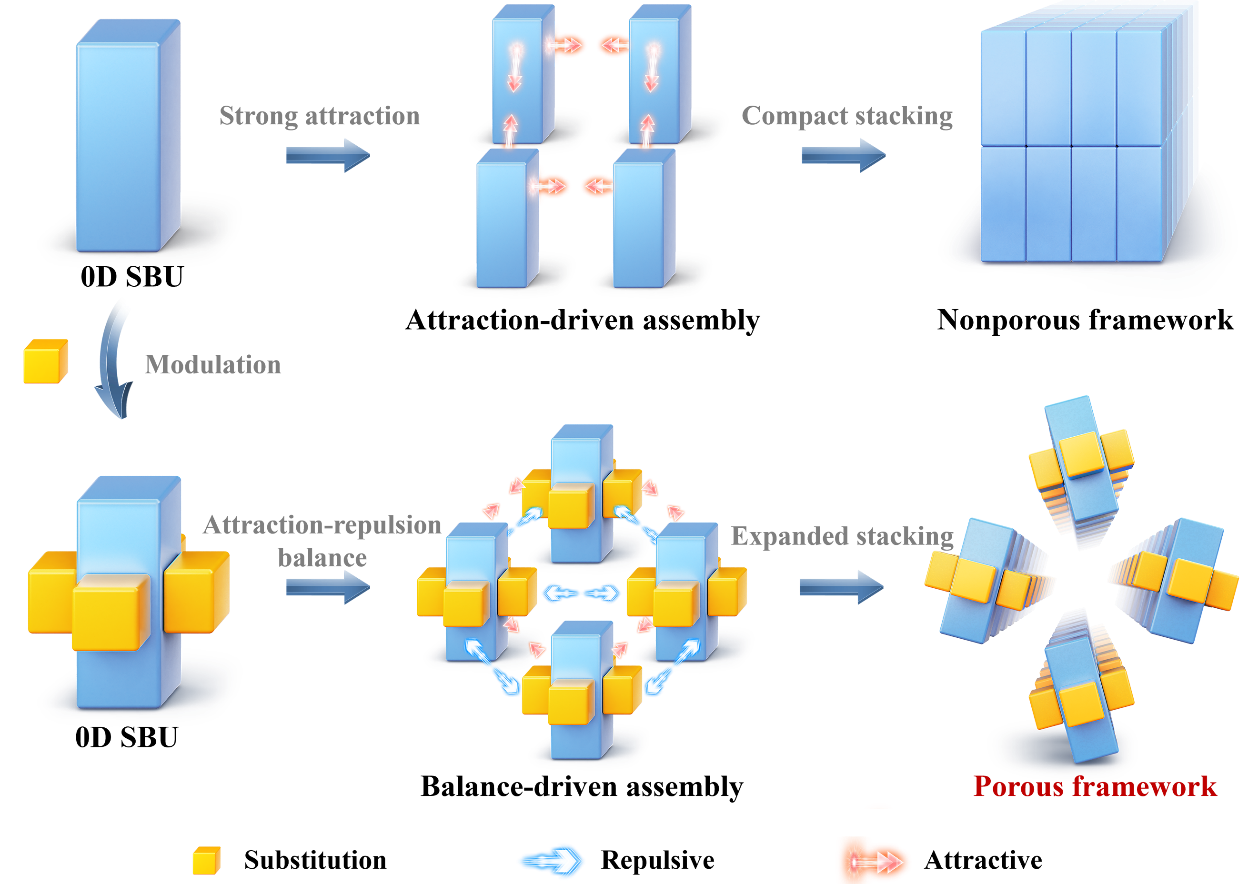


**Scheme 1 | Schematic illustration of the attraction-repulsion balance mechanism.** Substituents introduce net electrostatic repulsion while retaining attraction, thereby converting dense 0D SBU packing into an expanded porous framework with 1D channels.
