# Supplementary material
Source: Research Square preprint supplement (doi:10.21203/rs.3.rs-9872059/v1)
Supplement: Supplementary file 4 [file 61377f8a085e2fa2ef4ba17c.docx]

**Supplementary Information**

**Tuning Interlayer and Intralayer Interactions between Zero‑Dimensional Building Units to Construct High‑Porosity Metal-Organic Frameworks**

Yating Wang1, Feifei Zhang*1,Yanan Yang1,Yufei Dong1,Xiaoqing Wang1, Jinping Li*1,2 and Jiangfeng Yang*1

1College of Chemical Engineering and Technology, Taiyuan University of Technology, Taiyuan 030024, Shanxi Province, China
2Shanxi Research Institute of Huairou Laboratory, Taiyuan 030032, Shanxi Province, China
*Corresponding author. E-mail: zhangfeifei0096@link.tyut.edu.cn; jpli211@hotmail.com; yangjiangfeng@tyut.edu.cn

Table of Contents

[Experimental Procedures 3](#_Toc229040289)

[**Chemicals** 3](#_Toc229040290)

[**Fitting of pure component isotherms** 3](#_Toc229040291)

[**Isosteric heat of adsorption** 3](#_Toc229040292)

[**Ideal Adsorbed Solution Theory (IAST) Calculations** 3](#_Toc229040293)

[**Diffusional time constants and kinetic selectivity** 4](#_Toc229040294)

[**In-situ IR spectroscopic analysis** 4](#_Toc229040295)

[**Theoretical calculation methods** 4](#_Toc229040296)

[Supplementary Figures and Tables 5](#_Toc229040297)

[References 37](#_Toc229040298)

**Experimental Procedures**

**Chemicals**

Cobalt(II) chloride hexahydrate (CoCl2·6H2O, 99%) was purchased from Innochem. Succinic acid (H2SA, C4H6O4, 99.5%) was obtained from Macklin. 2,2-Dimethylsuccinic acid (H2DMSA, C6H10O4, 98%) and 2-phenylsuccinic acid (H2PhSA, C10H10O4, 98%) were purchased from Aladdin. 4-tert-Butylsulfonylcalix[4]arene (H4SC4A‑SO2,C44H56O6S4, 98%) was supplied by Tci. Methanol (CH3OH) and N,N-dimethylformamide (DMF, C3H7NO) were provided by Sinopharm Chemical Reagent Co., Ltd. All reagents were used as received without further purification. Deionized water used in the experiments was prepared in our laboratory.

**Fitting of pure component isotherms**

Following activation at 423 K under high vacuum (1 × 10-5 mbar) for 8 h, single-component adsorption isotherms for CH4 and N2 were collected on an ASAP 2460 analyzer at 298 K. The experimental data were fitted with the dual-site Langmuir–Freundlich (DSLF) model, which is well suited for describing adsorption on heterogeneous surfaces comprising two distinct site types. In this model, the equilibrium adsorption capacity q (cm3 g-1) is given by:

where  and  are the saturation capacities (cm3 g-1) of the two sites,  and  are the corresponding affinity coefficients (bar-1), and  and  account for deviations from ideal surface homogeneity. The DSLF model provided excellent fits to the experimental isotherms, with correlation coefficients (R²) exceeding 0.999 for both adsorbates.

**Isosteric heat of adsorption**

The isosteric heats of adsorption (*Q*st) for CH₄ and N₂ on the TUTJ materials were determined from single-component adsorption isotherms collected at 273 K, 298 K, and 313 K using the Clausius–Clapeyron equation. This method enables evaluation of the adsorption energetics and surface heterogeneity based on the temperature dependence of the adsorption isotherms.

The Clausius–Clapeyron equation is expressed as:

where  is the isosteric heat of adsorption (kJ·mol-1),  is the universal gas constant (8.314 J·mol-1·K-1),  and  are the two measurement temperatures (K), and  and  denote the pressures (bar) at which the same adsorbed amount is achieved on the isotherms measured at  and , respectively.

**Ideal Adsorbed Solution Theory (IAST) Calculations**

Ideal adsorbed solution theory (IAST) was employed to predict the adsorption behavior of gas mixtures in the TUTJ materials using the experimentally measured single-component isotherms. This approach assumes ideal mixing of the adsorbed species and allows the calculation of mixture equilibria solely from pure-component adsorption data. The selectivity for component 1 over component 2 in a binary mixture is defined as:

where  and  are the equilibrium adsorption uptakes (cm3 g-1) of components 1 and 2 in the adsorbed phase, and  and  are their respective partial pressures (bar) in the bulk gas phase.

**Diffusional time constants and kinetic selectivity**

The diffusional time constants ( and ) were derived using the short-time approximation of the Fickian diffusion model under the assumptions of a step change in gas phase concentration, initially clean adsorbent beds, and micropore diffusion as the rate-limiting step. The model is described by the following equation:

where  is the gas uptake at time ,  is the equilibrium uptake,  is the intracrystalline diffusivity, and  is the radius of an equivalent spherical particle. The time constants were obtained from the slopes of the linear regions in the plots of  versus  at low fractional uptake.

The kinetic selectivity for CH4 over N2 was calculated using the following relationship:

Where and present the diffusional time constants for methane and nitrogen, respectively.

**In-situ IR spectroscopic analysis**

In situ infrared spectra of adsorbed CH4 and N2 were recorded at room temperature on a Bruker V70 spectrometer equipped with an MCT detector and a stainless steel in situ cell fitted with KBr windows. The spectral resolution was 4 cm-1. Prior to measurement, the adsorbent powder was evenly placed in the sample cup of the reaction cell. The TUTJ samples were activated at 423 K under high vacuum (1 × 10-5 mbar) for 8 h, with heating and cooling rates of 5 K min-1. After cooling to room temperature, the background spectrum of the activated sample was recorded immediately. Subsequently, adsorption of CH4 and N2 was carried out sequentially until saturation was reached.

**Theoretical calculation methods**

Binding energies (Eb) for CH4 and N2 adsorption in TUTJ-DMSA were calculated using DFT-D with the PBE functional. The binding energy was defined as:

Where *E*MOF is the energy of the optimized bare framework, *E*gas is the energy of the isolated gas molecule, and *E*gas+MOF is the energy of the optimized gas–framework complex. More negative binding energies correspond to stronger interactions between the adsorbate and the framework.

**Supplementary Figures and Tables**


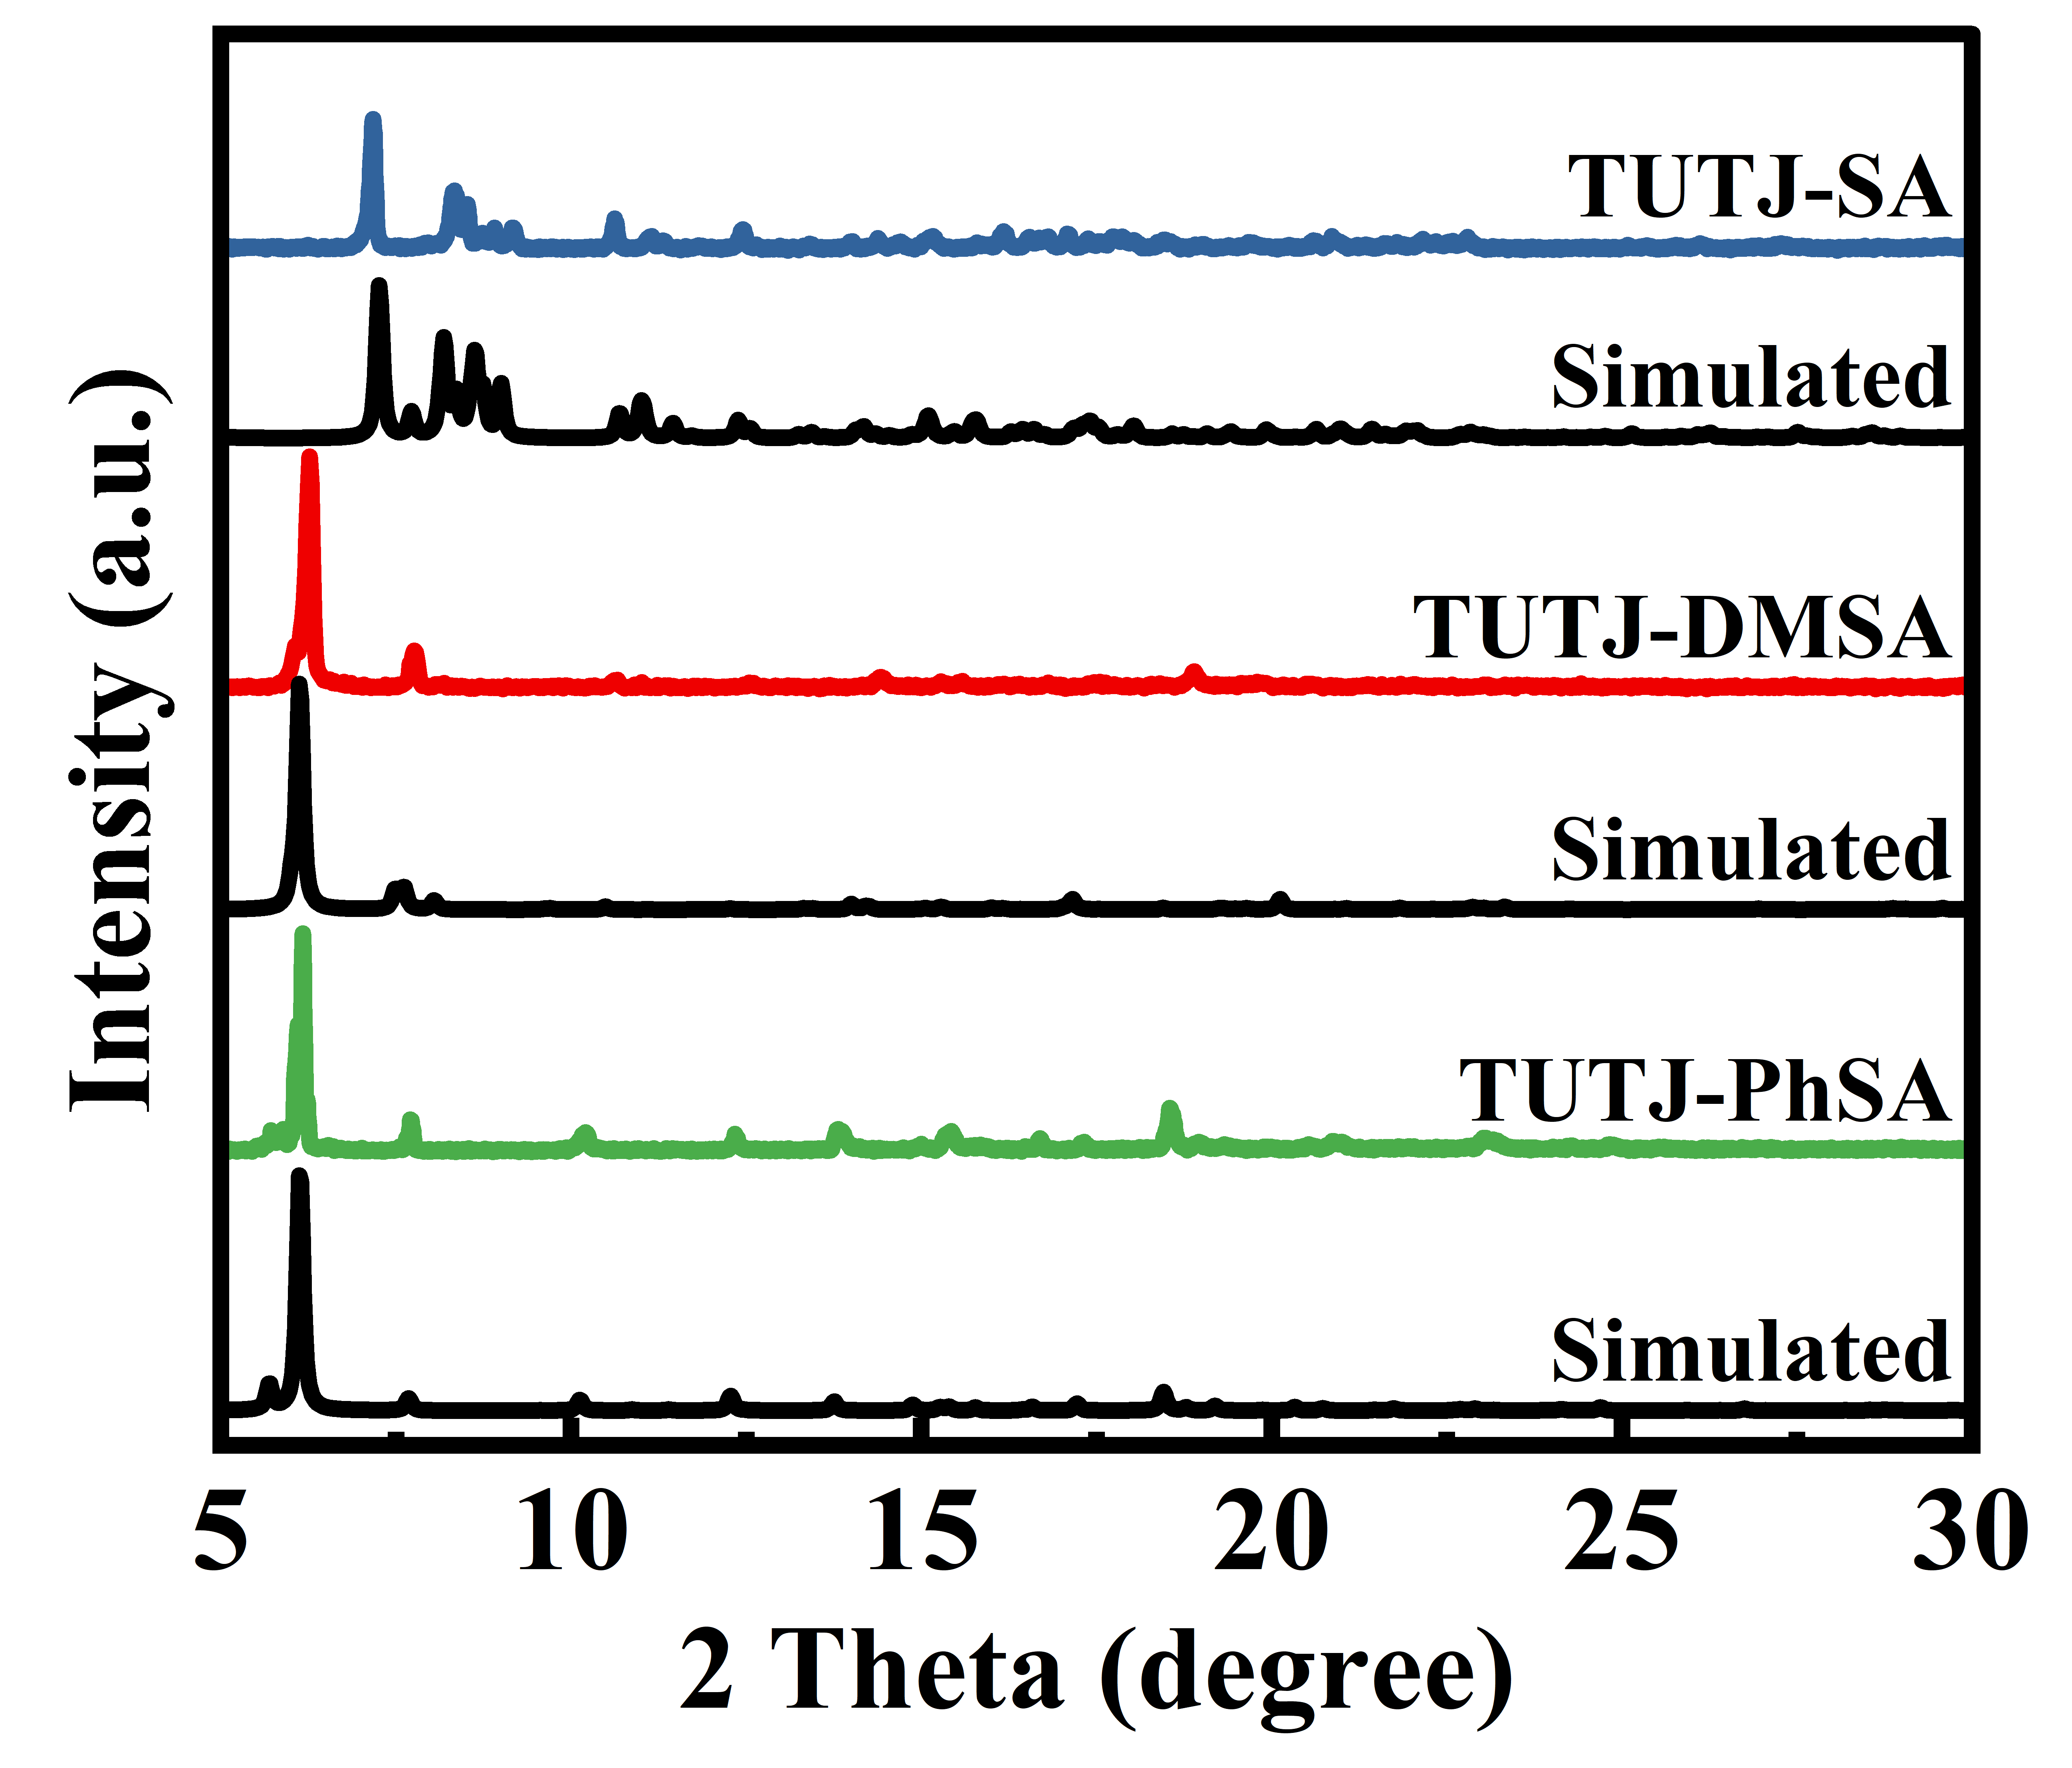


**Supplementary** Figure 1. PXRD patterns of TUTJ-SA, TUTJ-DMSA, TUTJ-PhSA


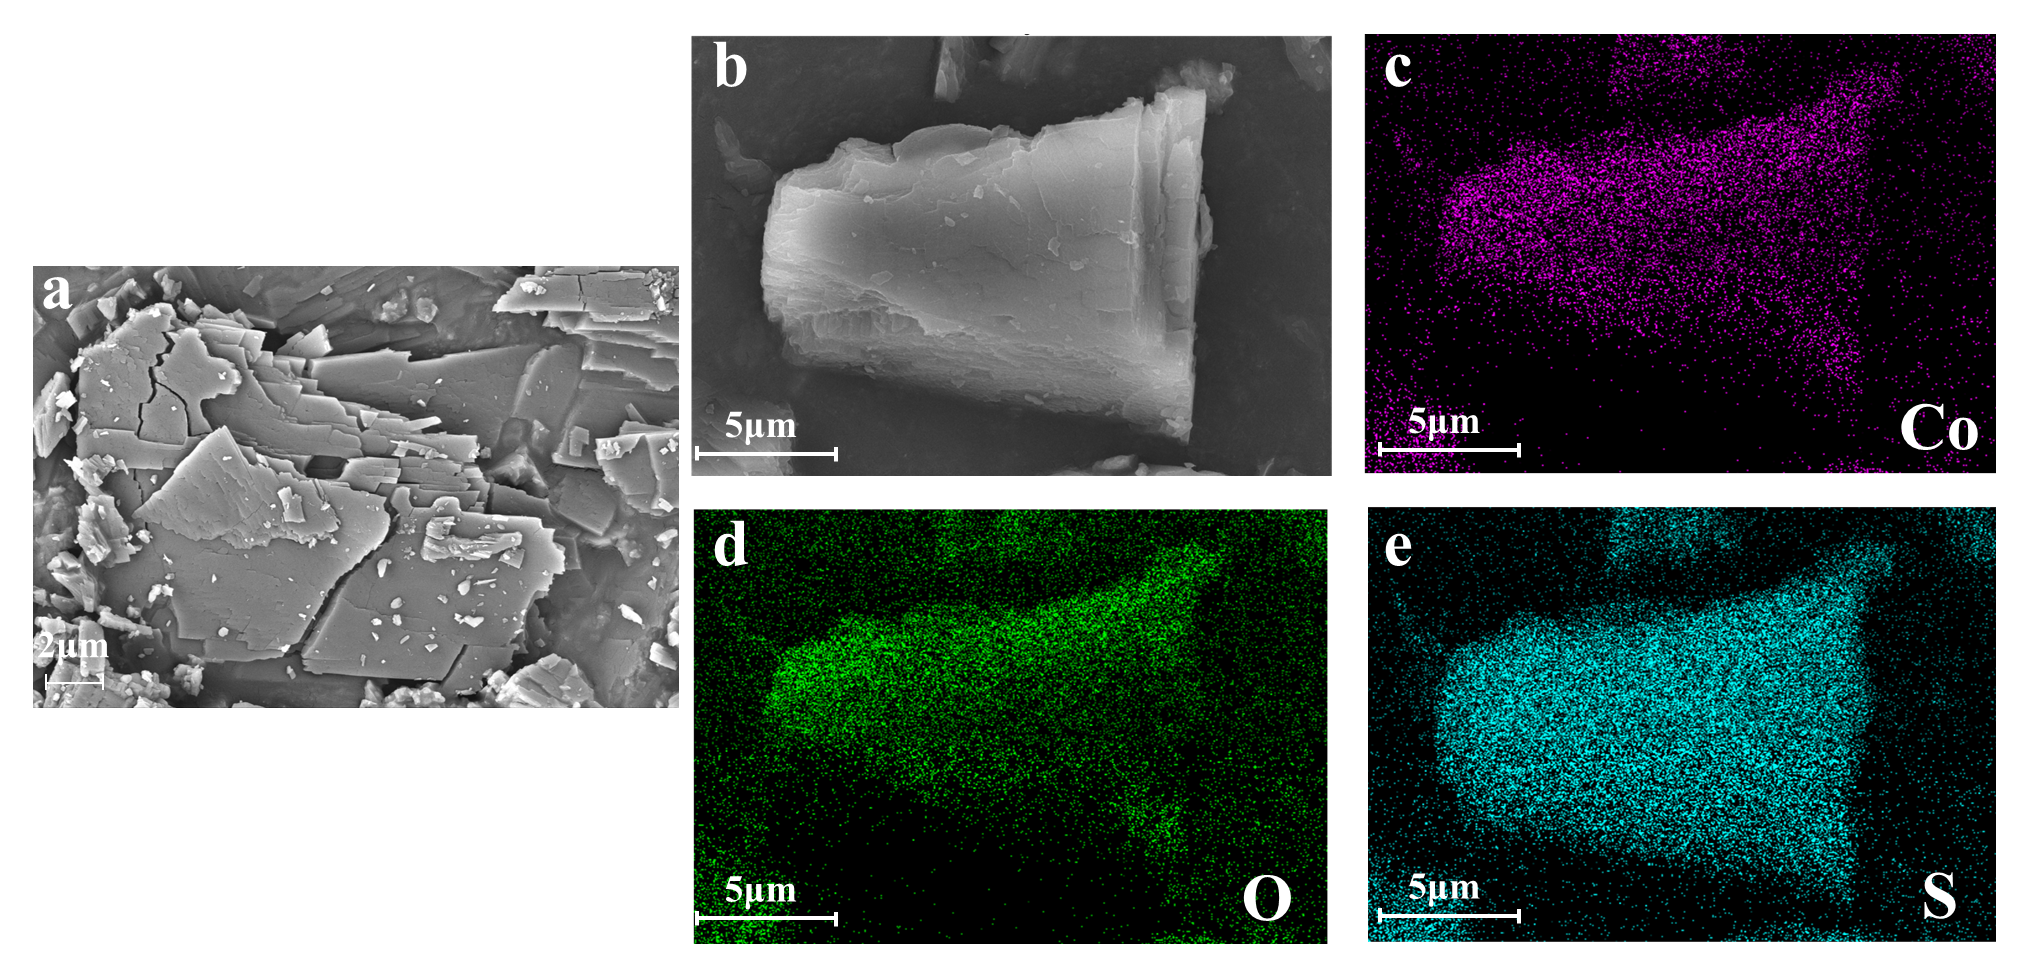


**Supplementary** Figure 2. (a,b) SEM images of TUTJ-SA crystals. (c–e) Corresponding energy‑dispersive X‑ray (EDX) elemental mapping images, revealing the homogeneous distribution of Co (c), O (d), and S (e) within the crystal.


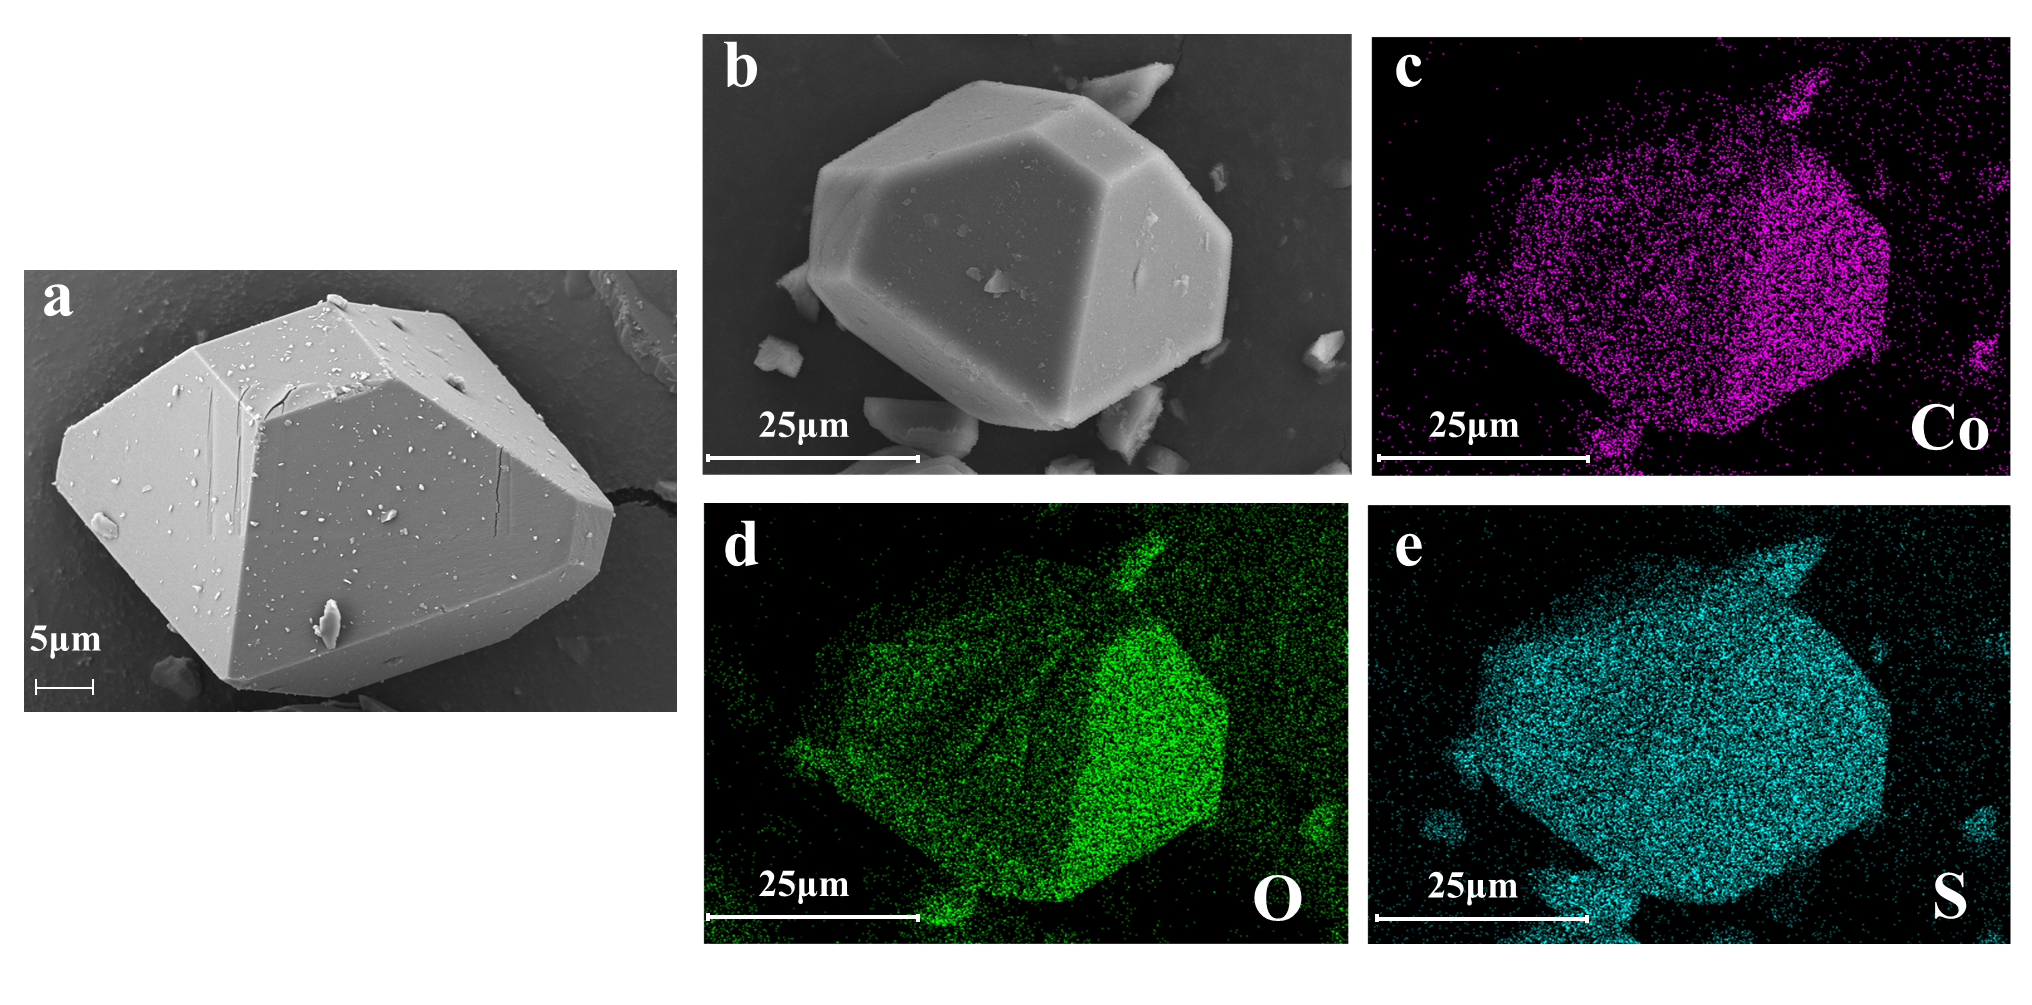


**Supplementary** Figure 3. (a,b) SEM images of TUTJ-DMSA crystals. (c–e) Corresponding energy‑dispersive X‑ray (EDX) elemental mapping images, revealing the homogeneous distribution of Co (c), O (d), and S (e) within the crystal.


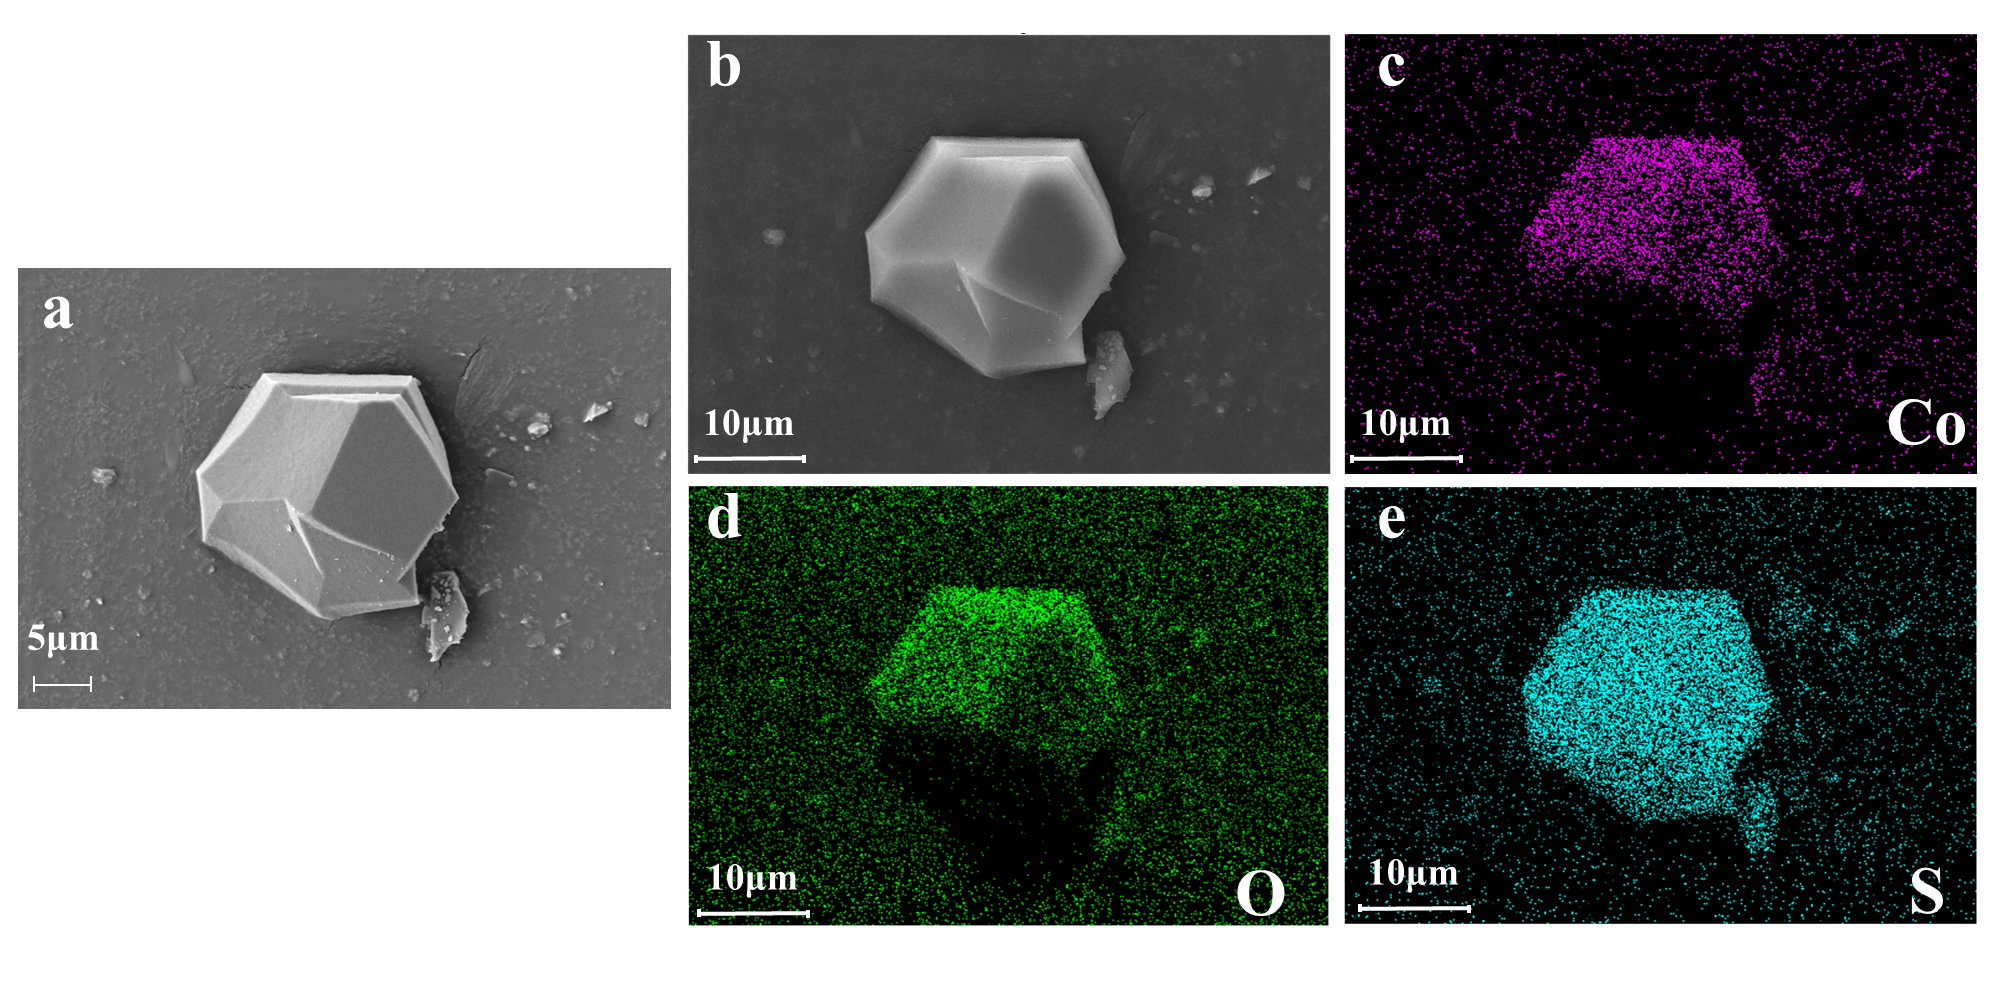


**Supplementary** Figure 4. (a,b) SEM images of TUTJ-PhSA crystals. (c–e) Corresponding energy‑dispersive X‑ray (EDX) elemental mapping images, revealing the homogeneous distribution of Co (c), O (d), and S (e) within the crystal.


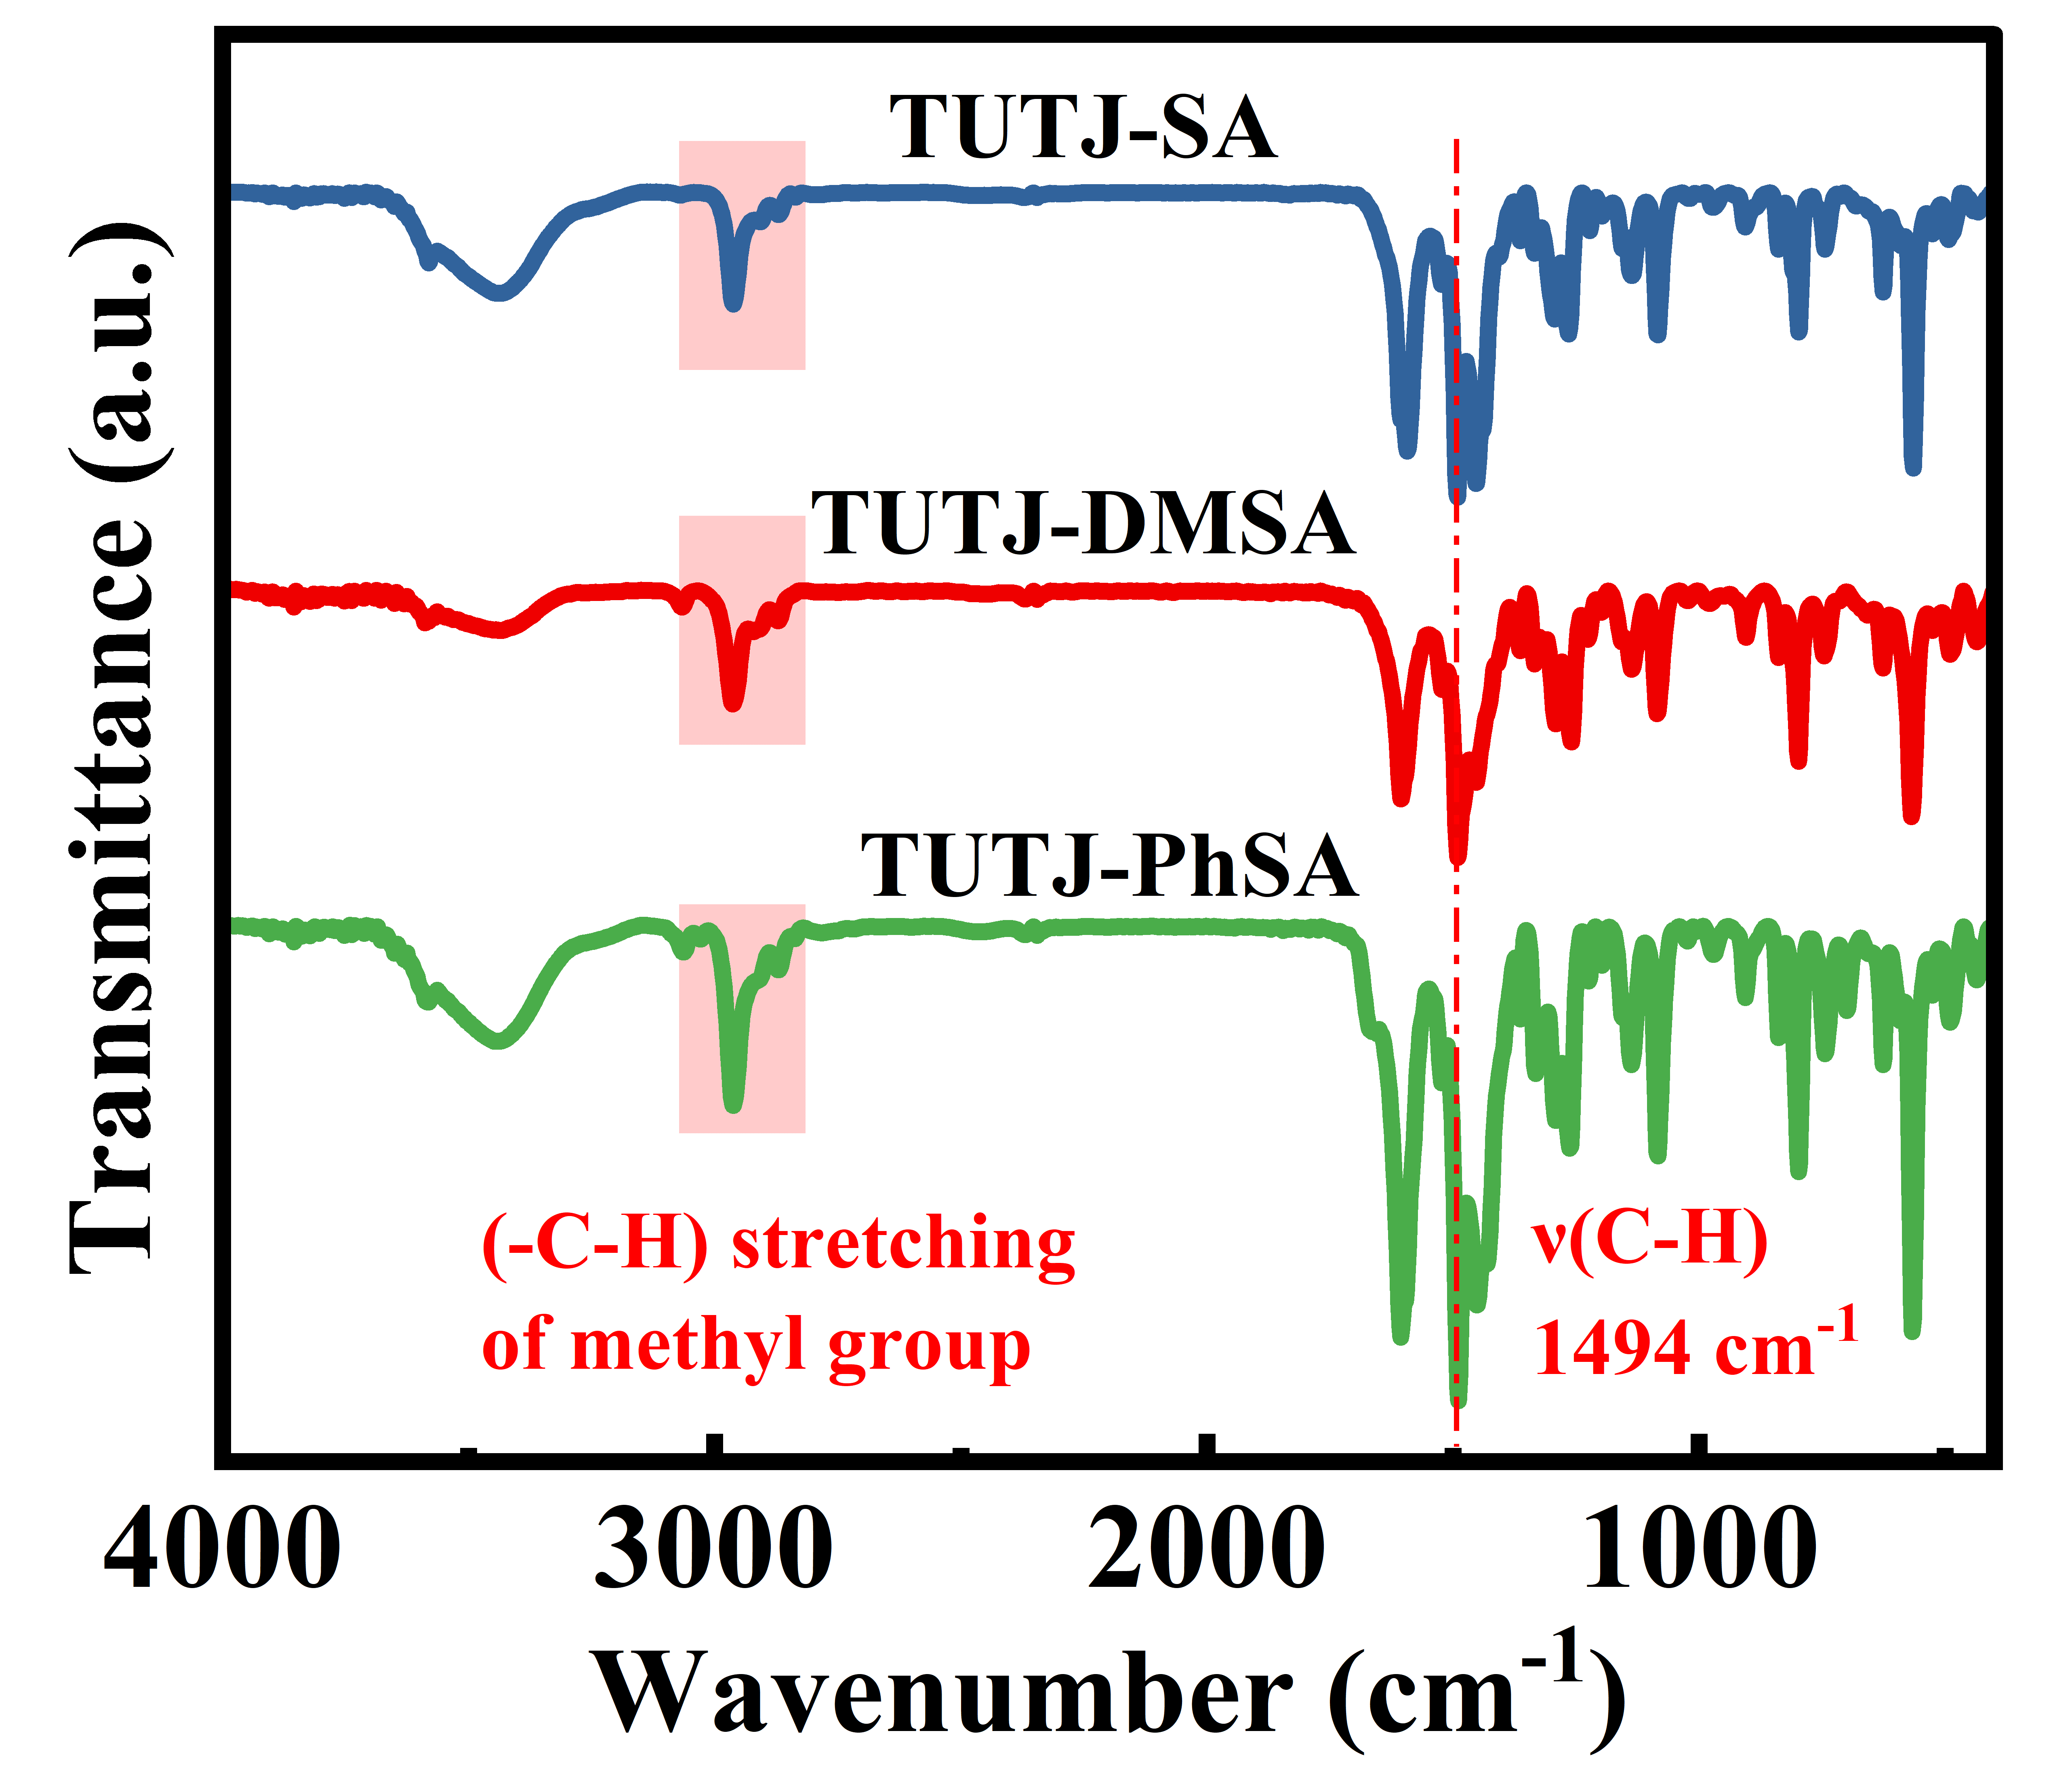


**Supplementary** Figure 5. FT-IR transmittance spectra of TUTJ-SA, TUTJ-DMSA, and TUTJ-PhSA.


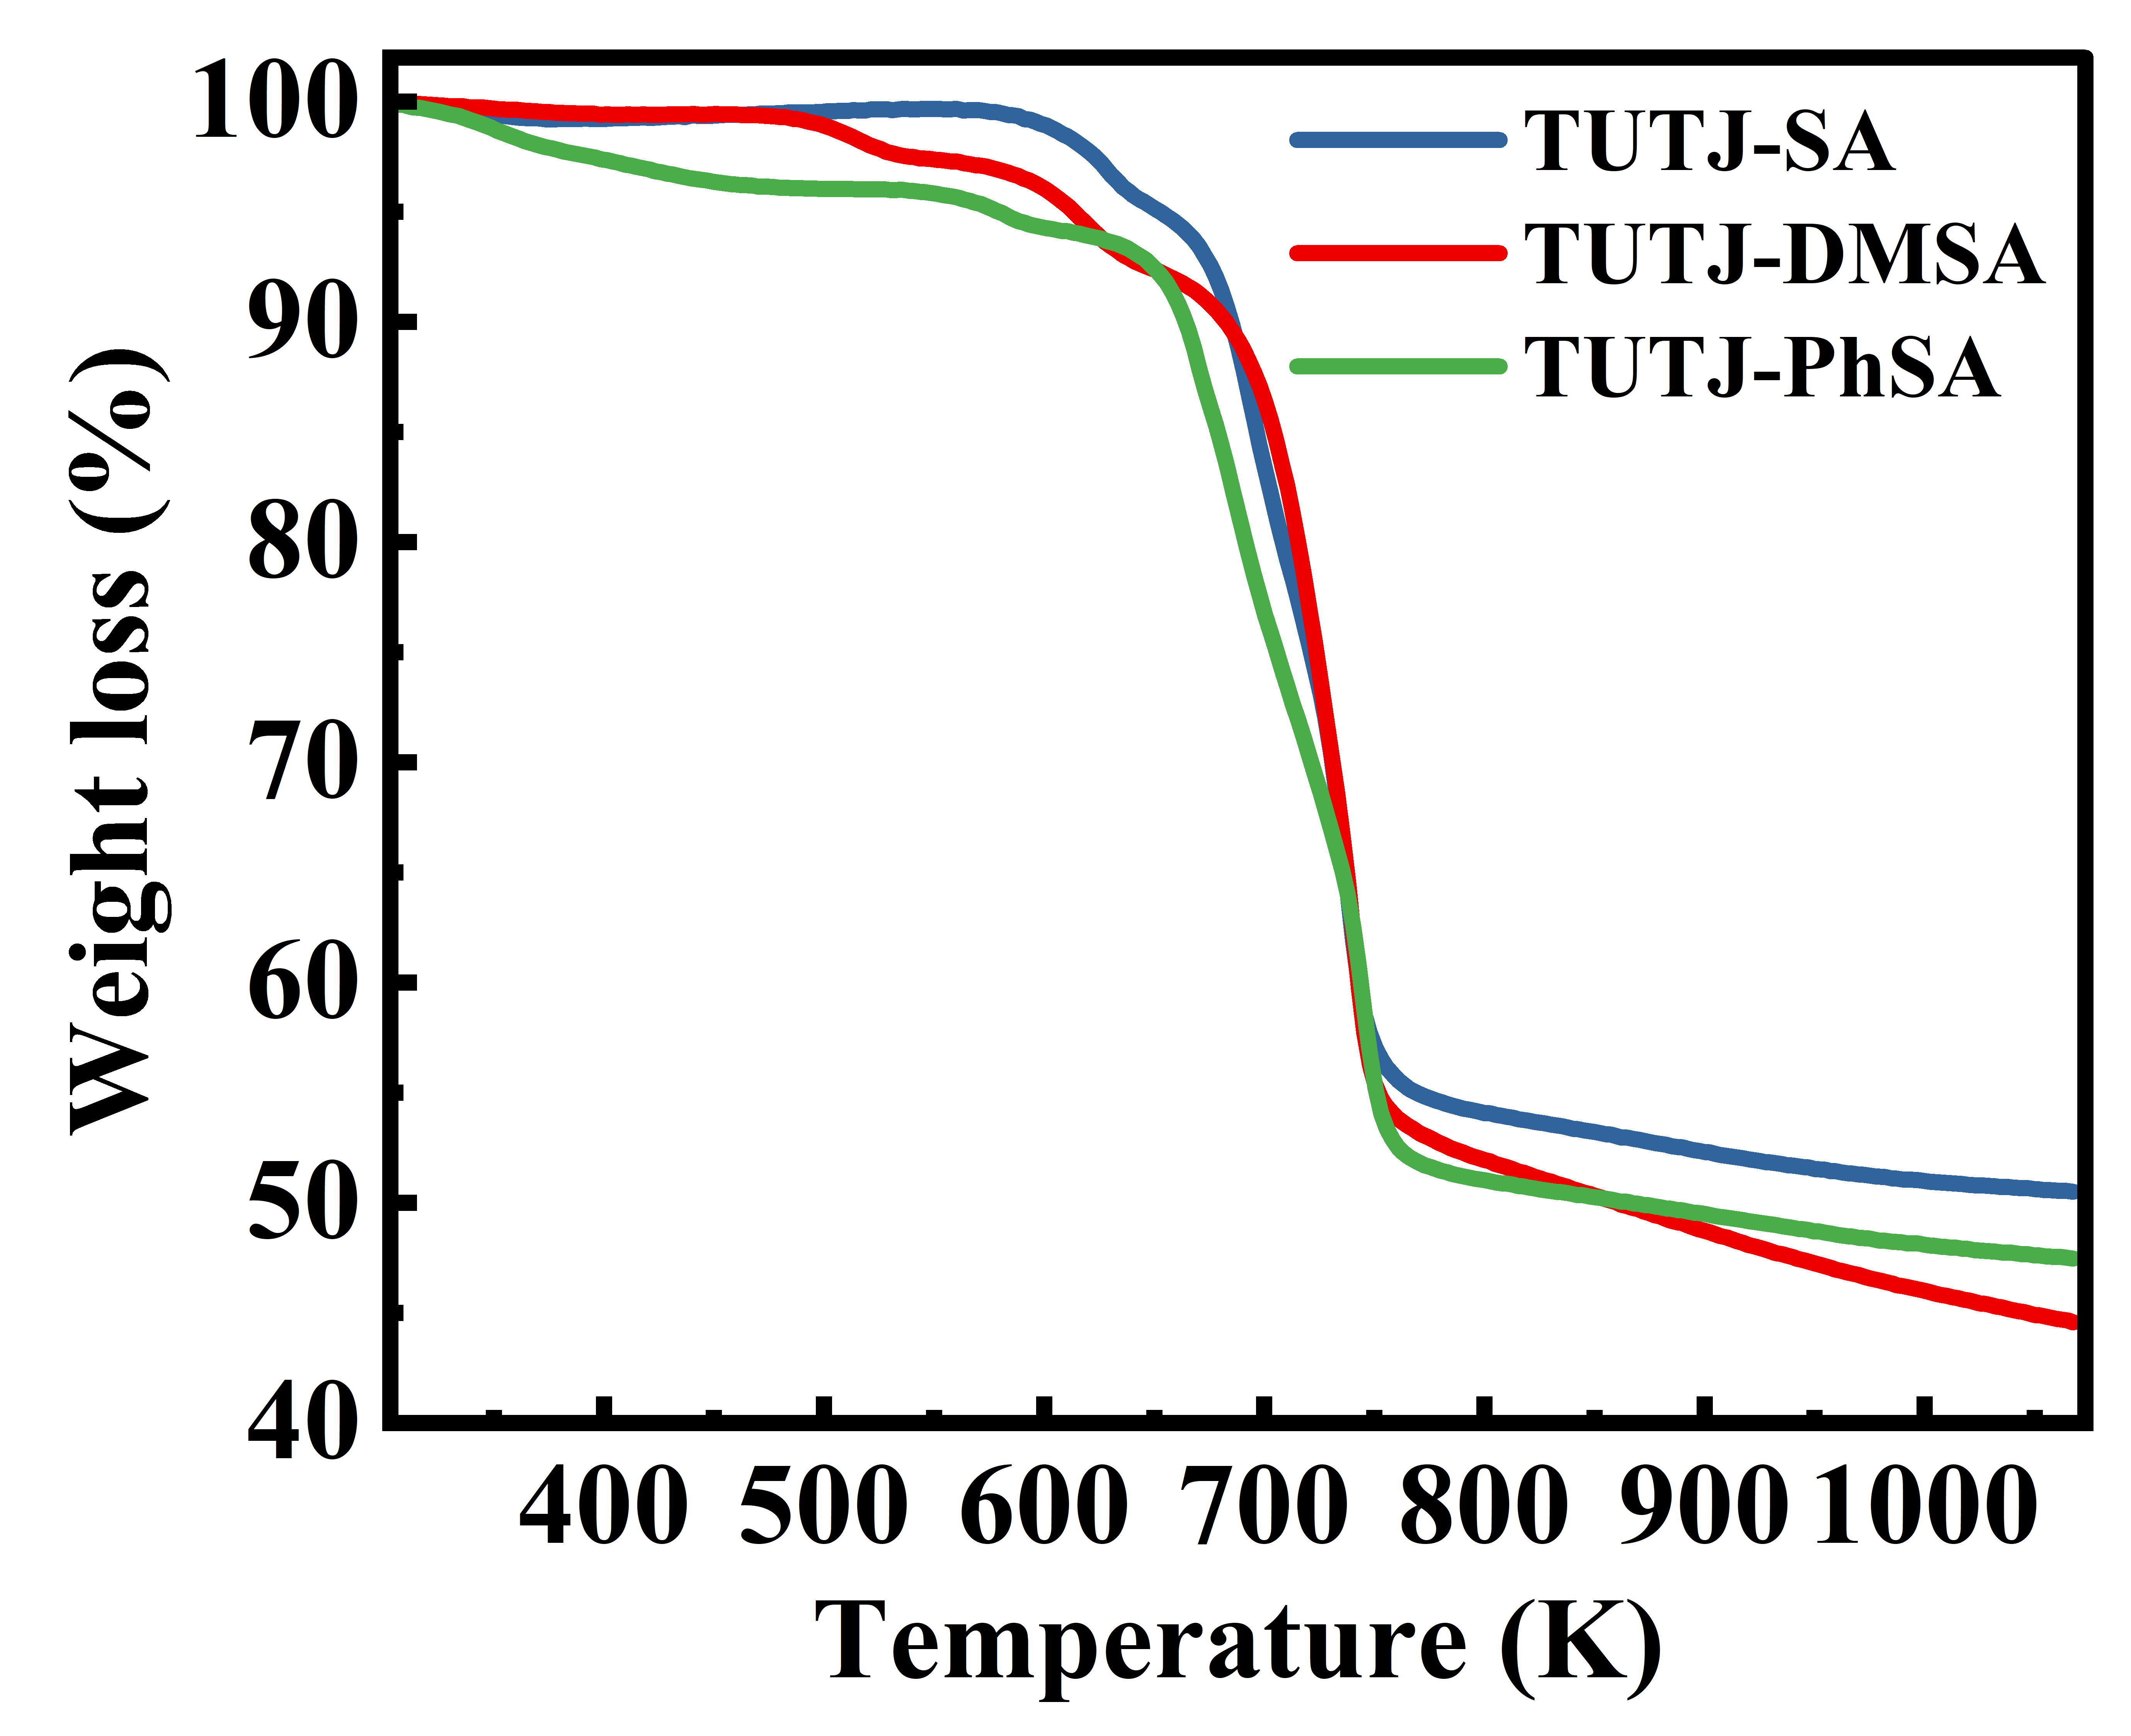


**Supplementary Figure 6.** Thermogravimetric analysis curves of TUTJ-SA, TUTJ-DMSA and TUTJ-PhSA.


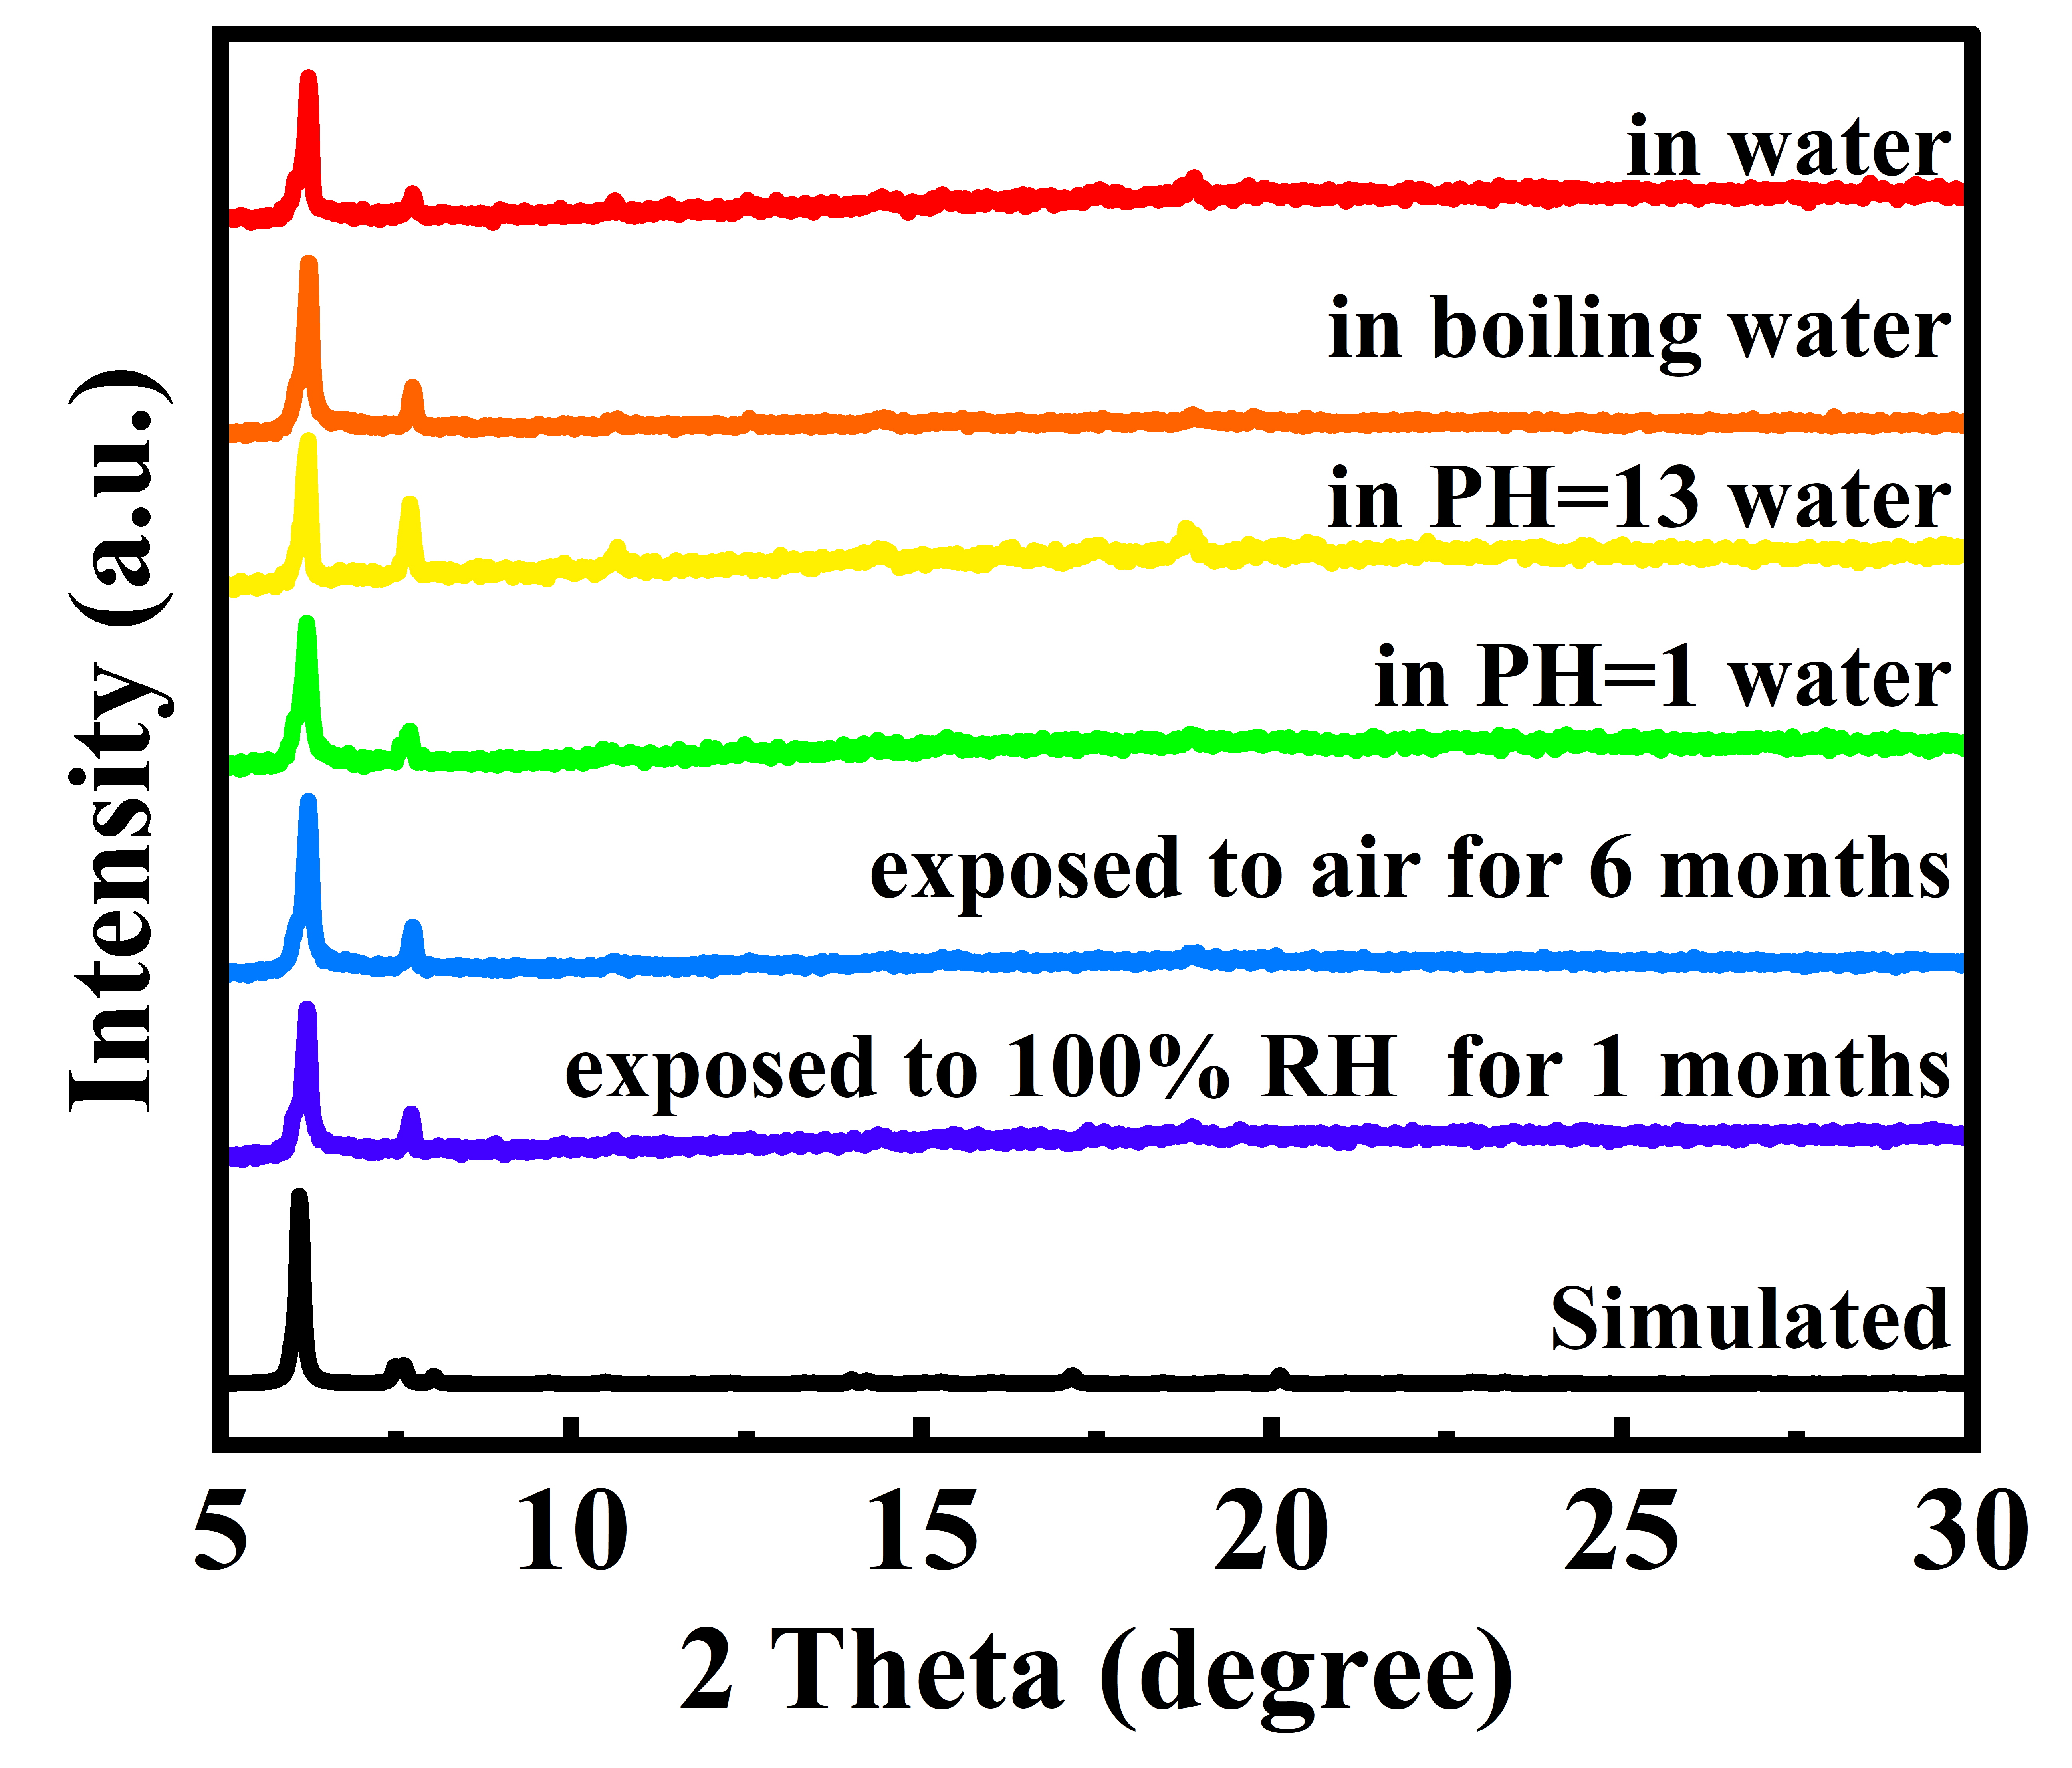


**Supplementary** Figure 7. The PXRD patterns of TUTJ-DMSA after exposure to various extreme conditions.


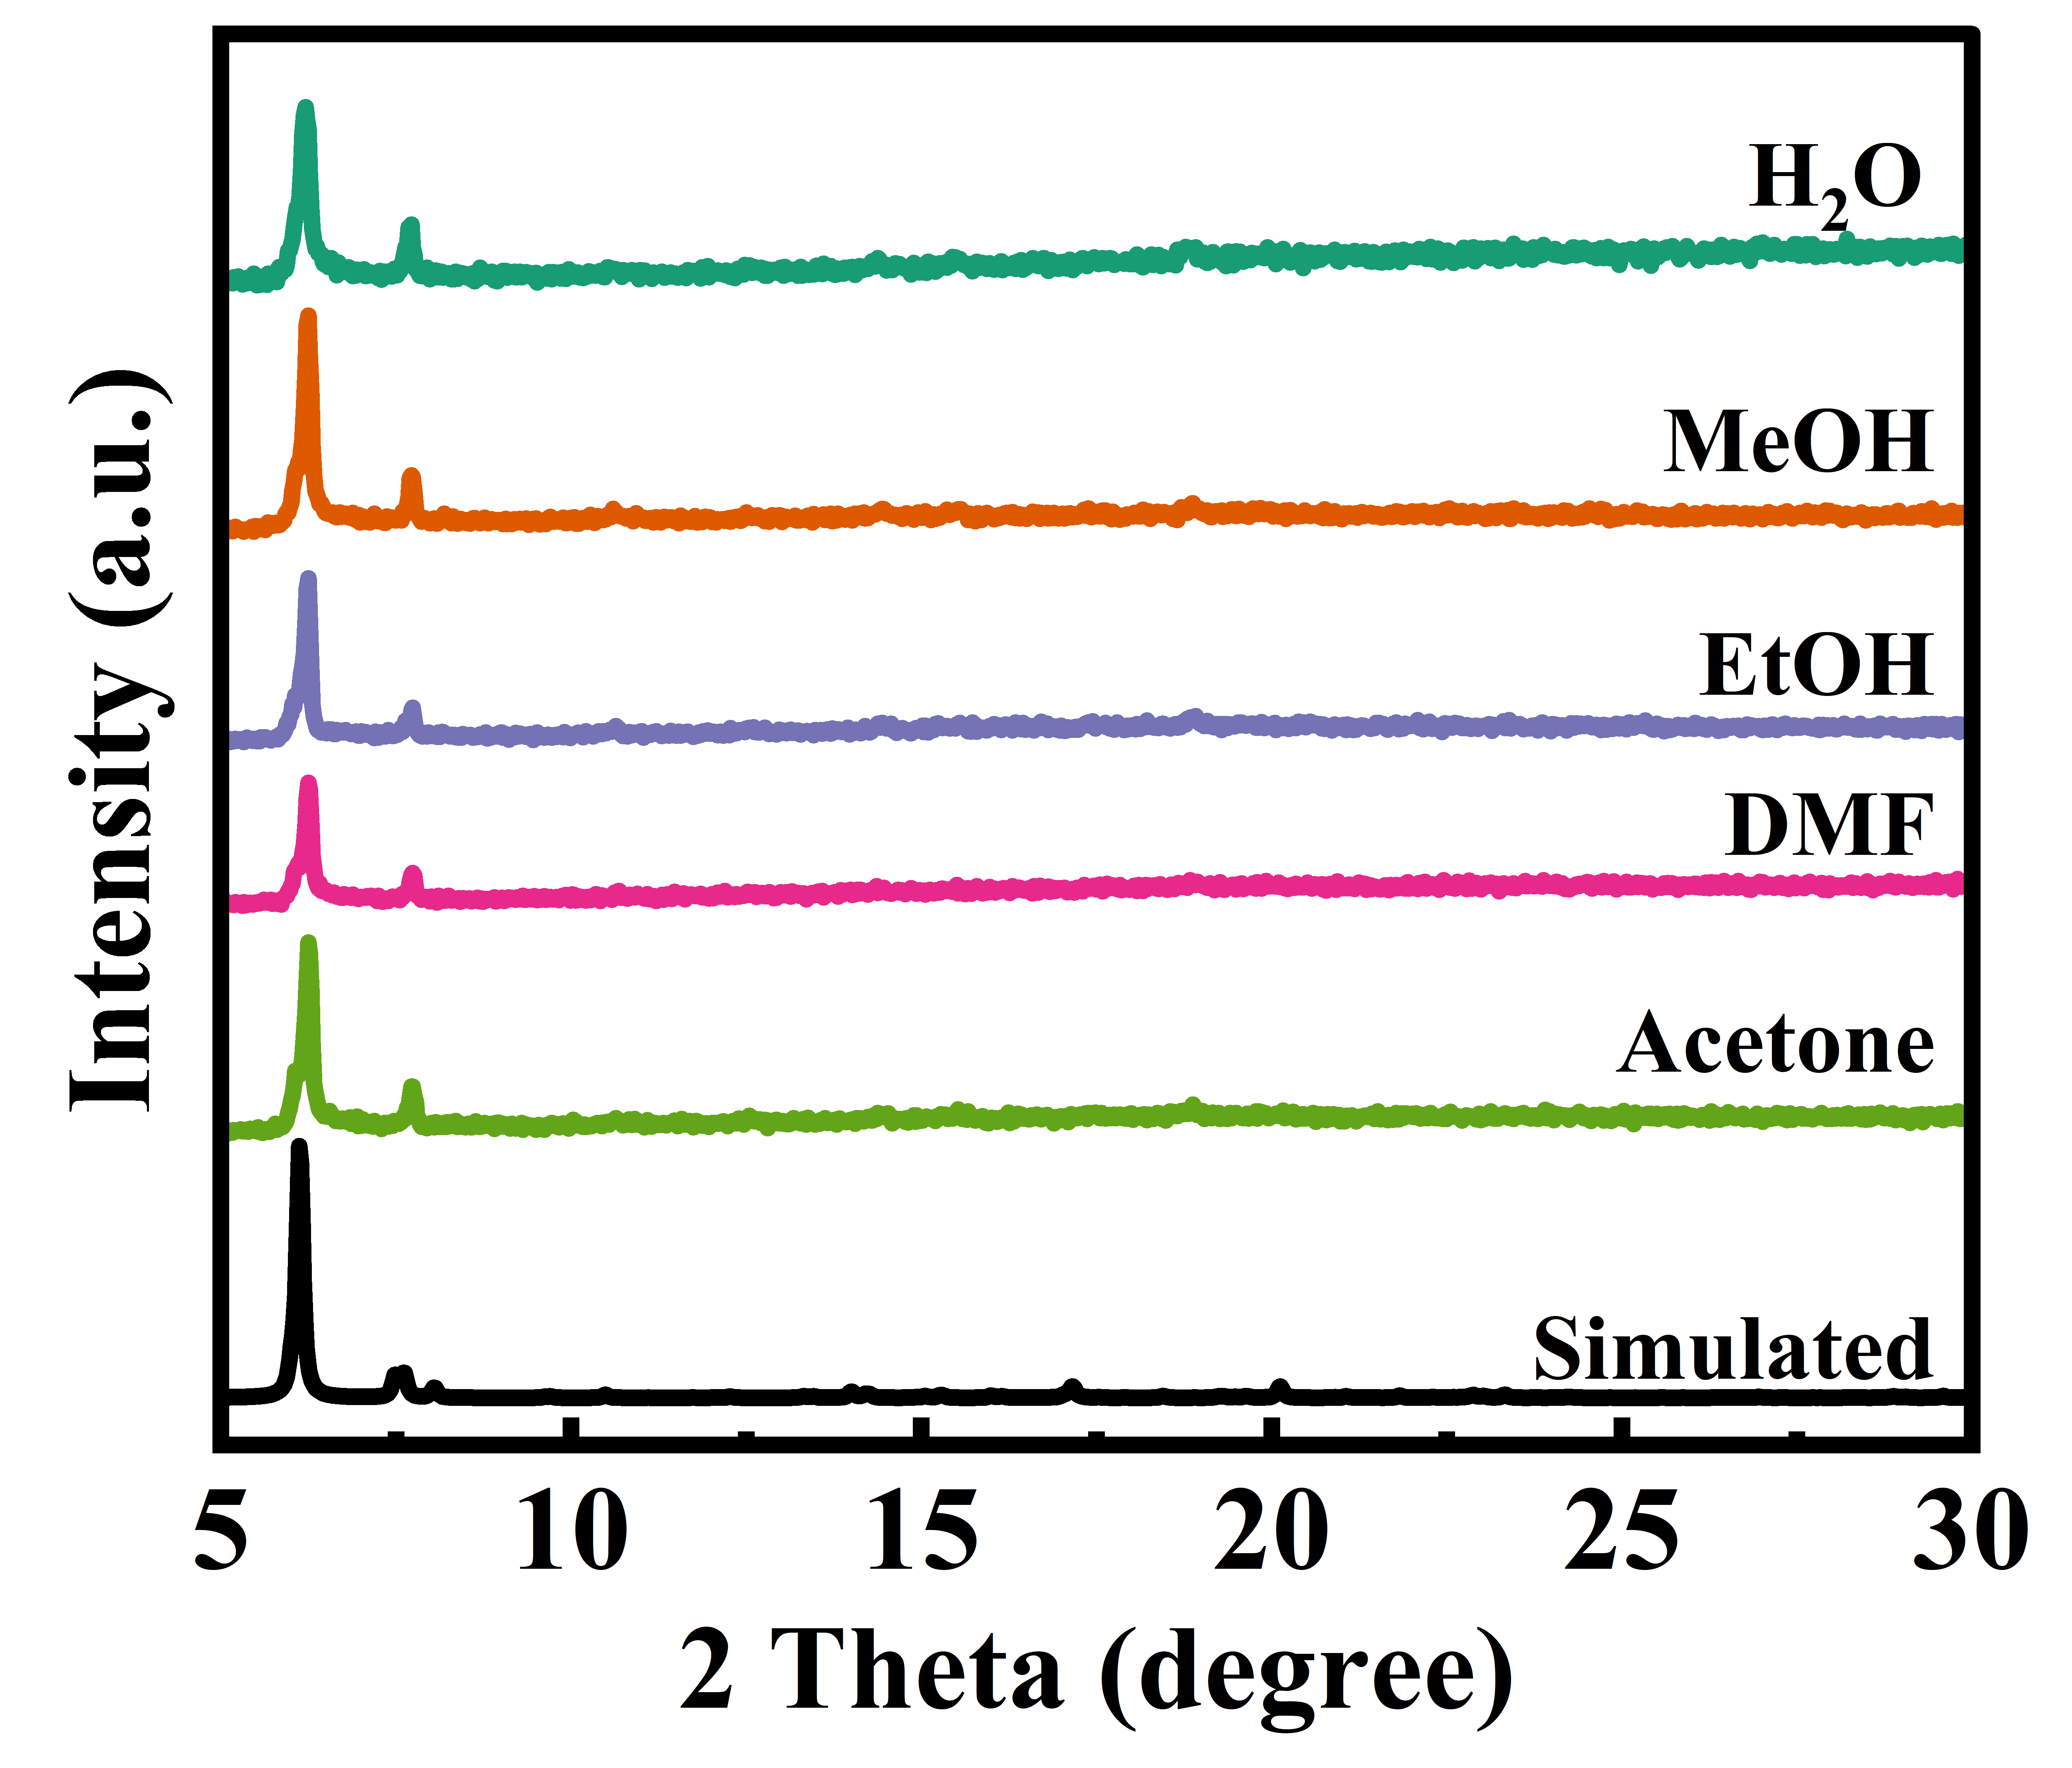


**Supplementary** Figure 8. The PXRD patterns of TUTJ-DMSA soaking different solvents for two weeks.


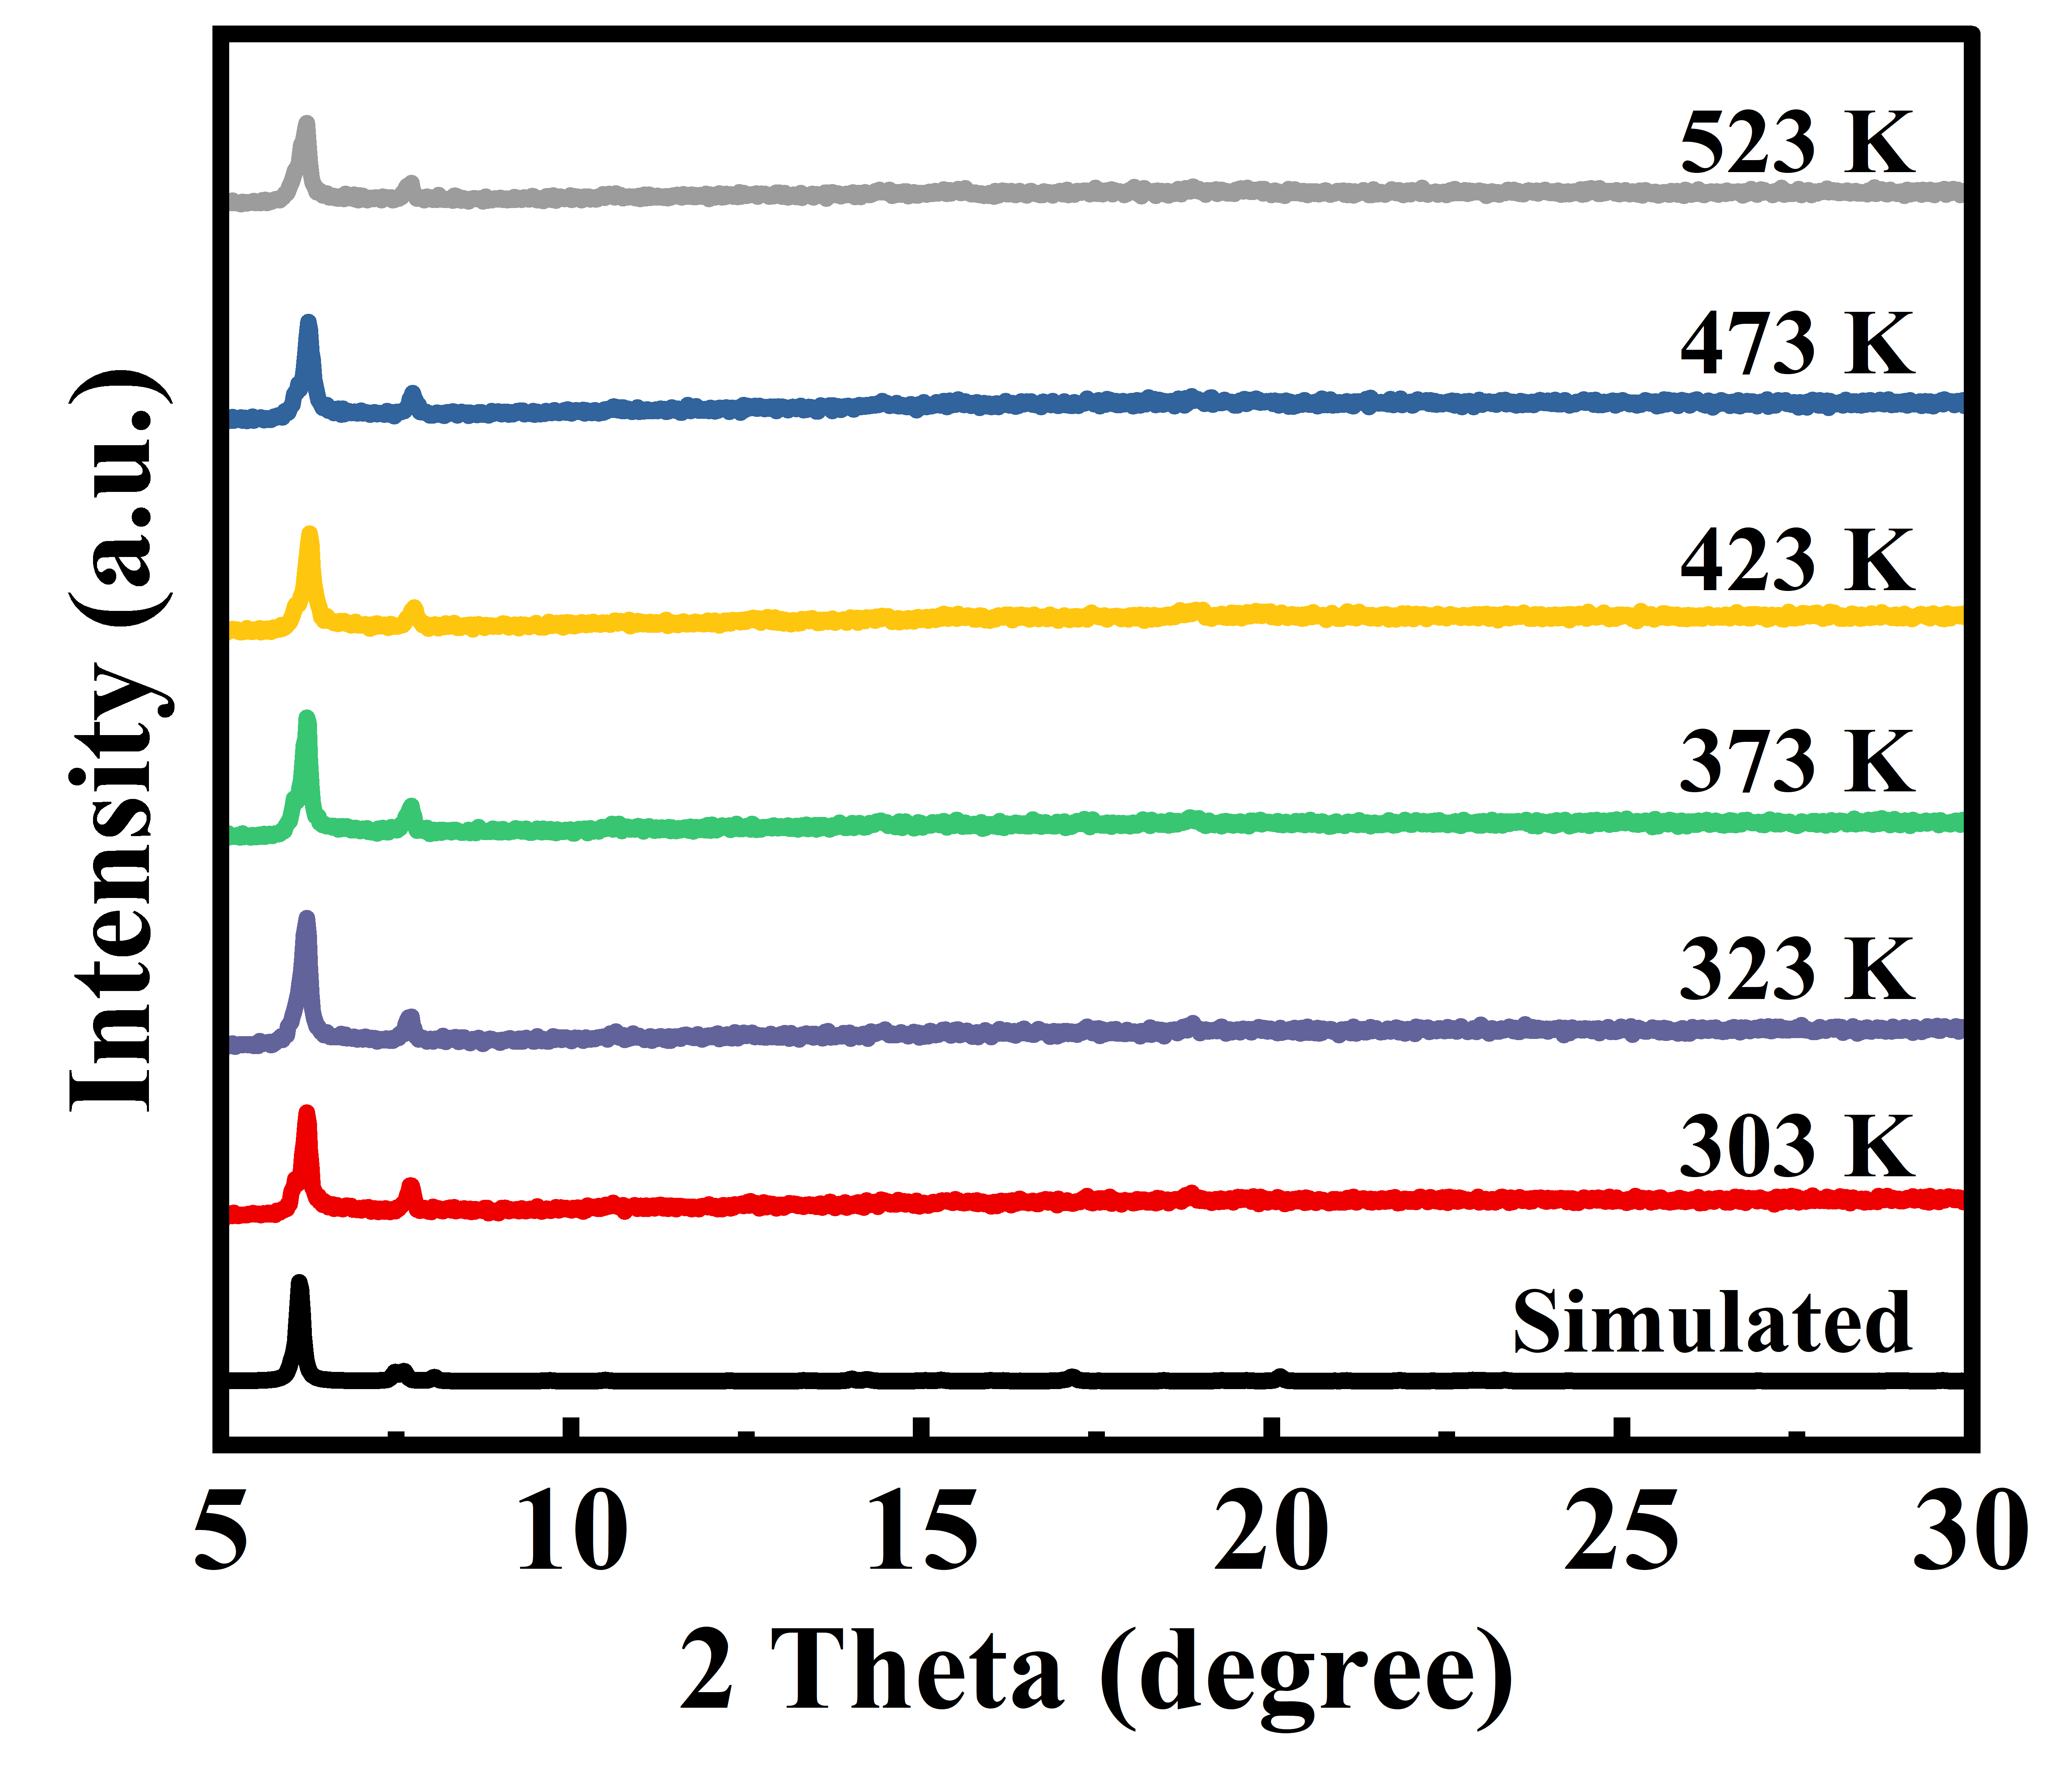


**Supplementary** Figure 9. The PXRD patterns of TUTJ-DMSA after activation at different temperatures.


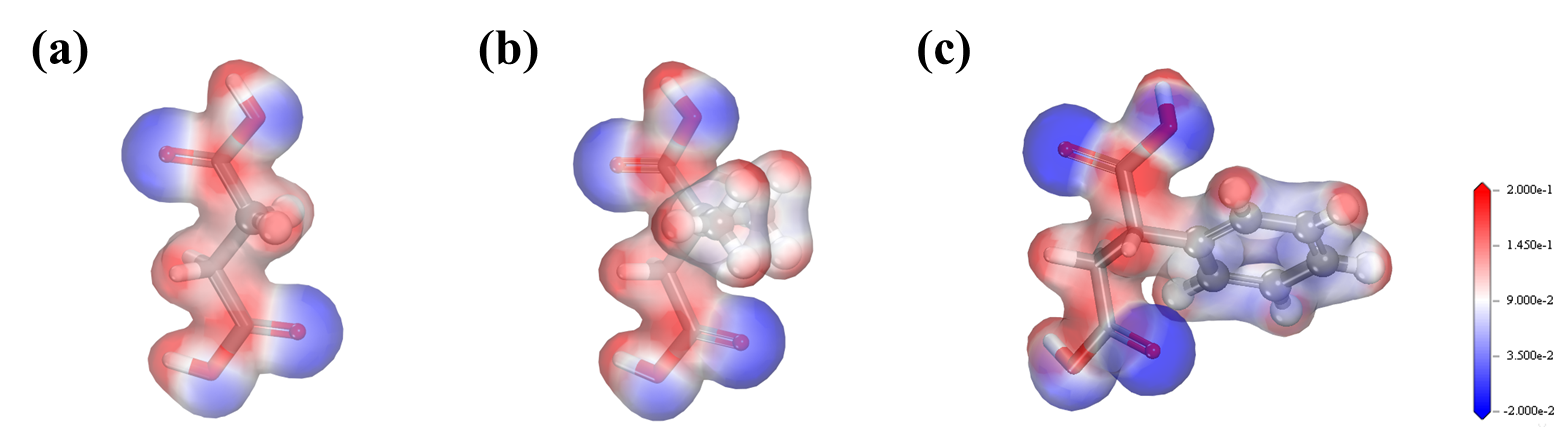


**Supplementary** Figure 10. Molecular electrostatic potential (ESP) maps of the three organic ligands.(a) TUTJ-SA, (b) TUTJ-DMSA, (c) TUTJ-PhSA. Blue regions denote negative electrostatic potential (δ-, electron-rich areas), while red regions represent positive electrostatic potential (δ+, electron-deficient areas).

**
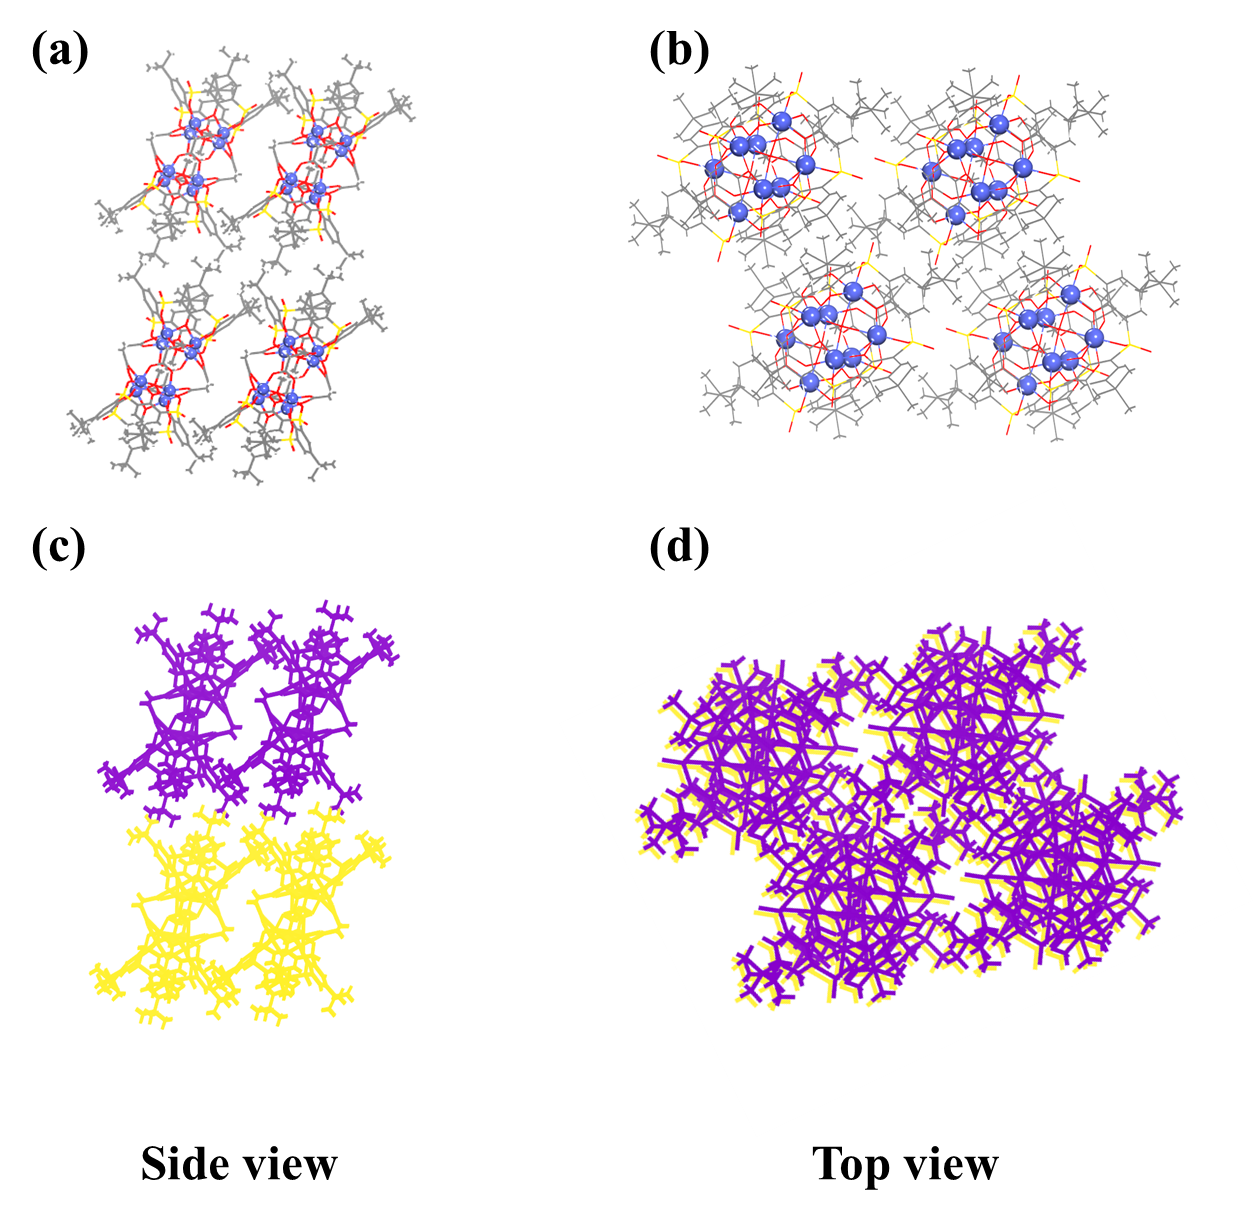
**

**Supplementary Figure 11.** Side (a, c) and top (b, d) views of the hierarchical packing arrangement of TUTJ-SA.


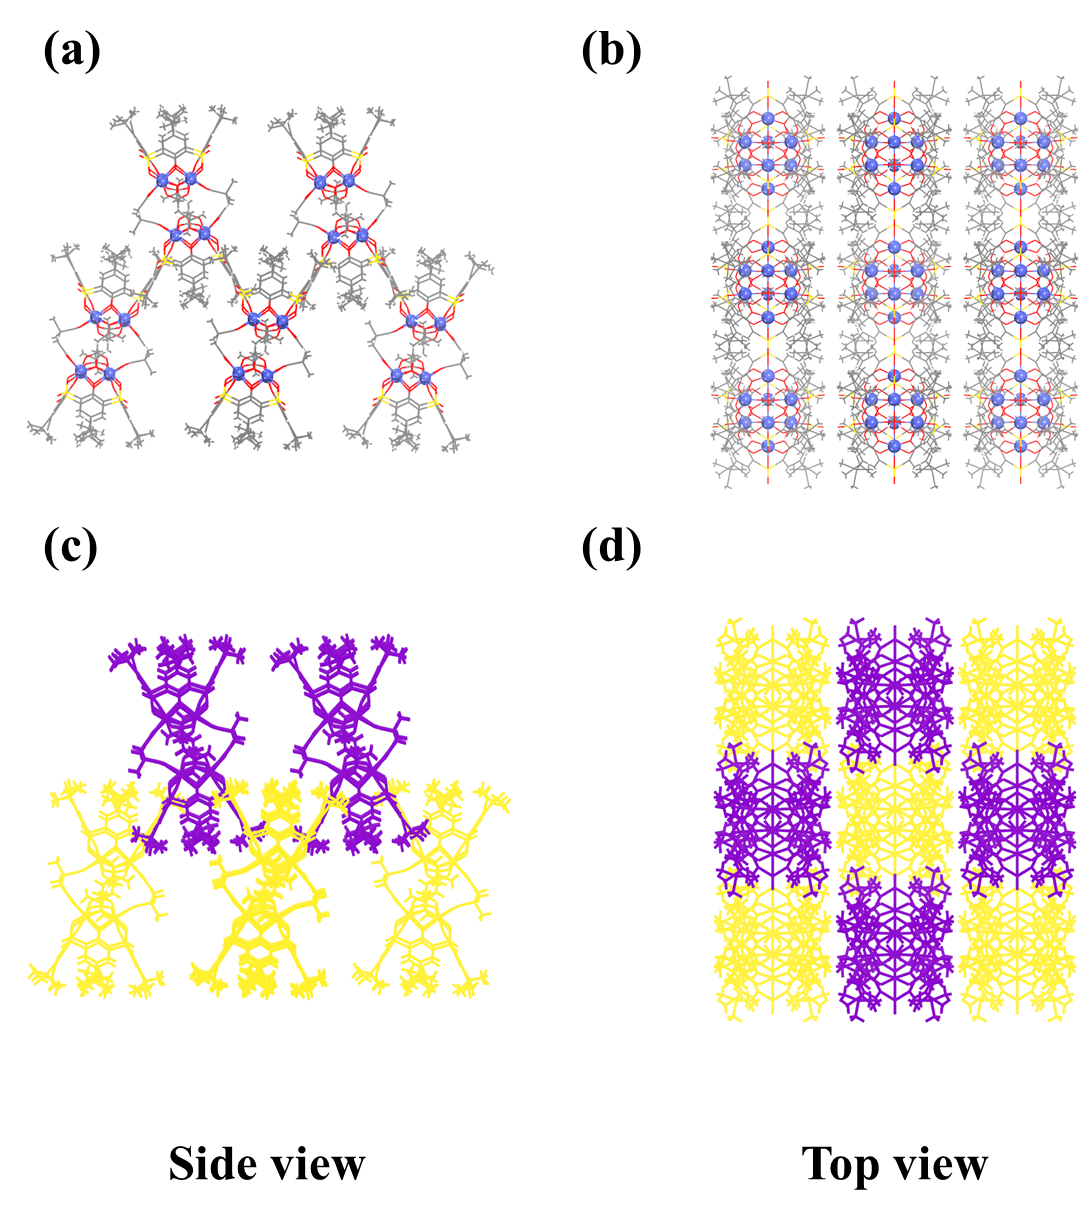


**Supplementary Figure 12****.** Side (a, c) and top (b, d) views of the hierarchical packing arrangement of TUTJ-DMSA.

**
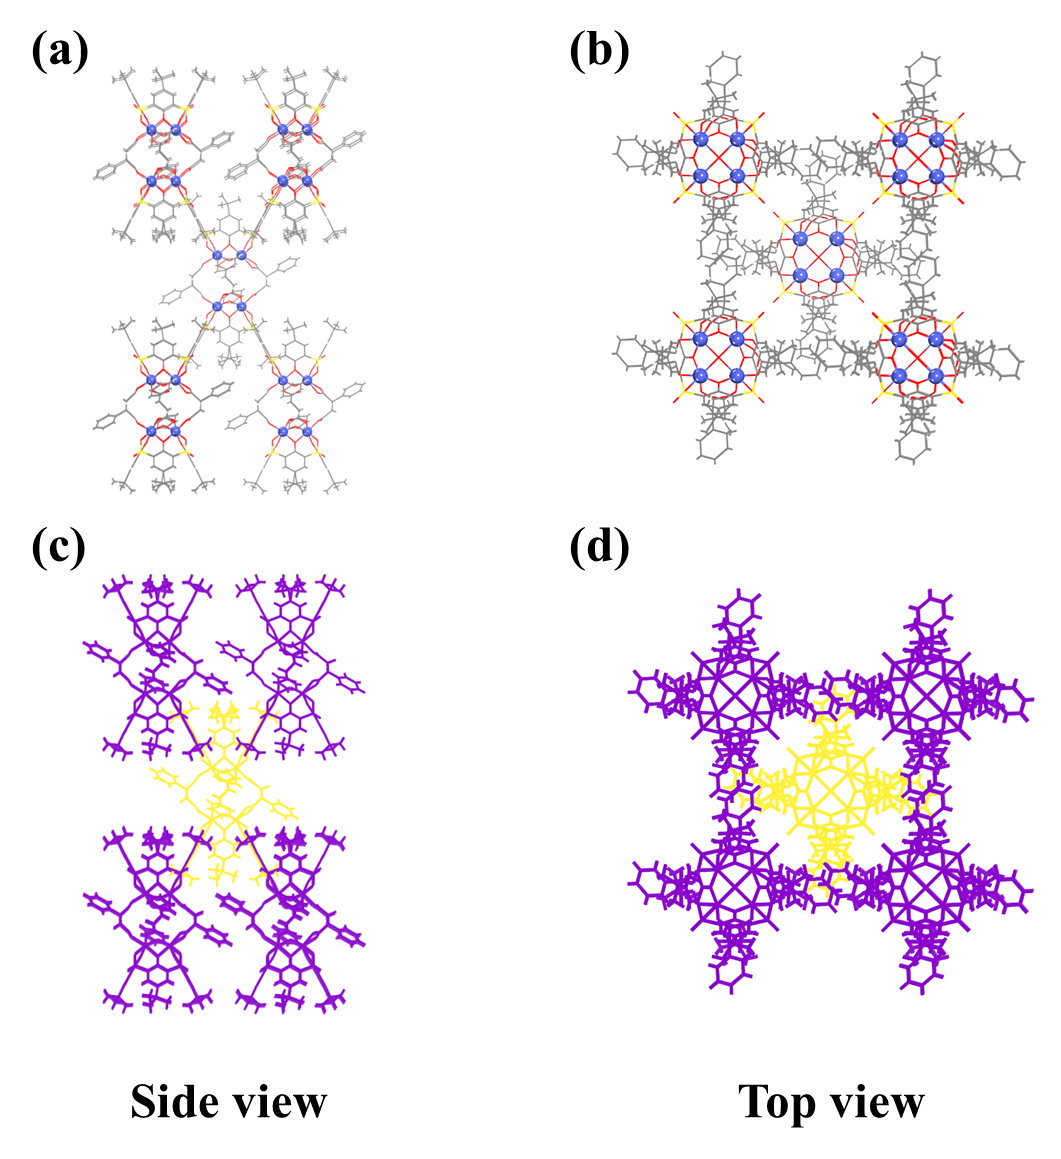
**

**Supplementary** Figure 13. Side (a, c) and top (b, d) views of the hierarchical packing arrangement of TUTJ-PhSA.


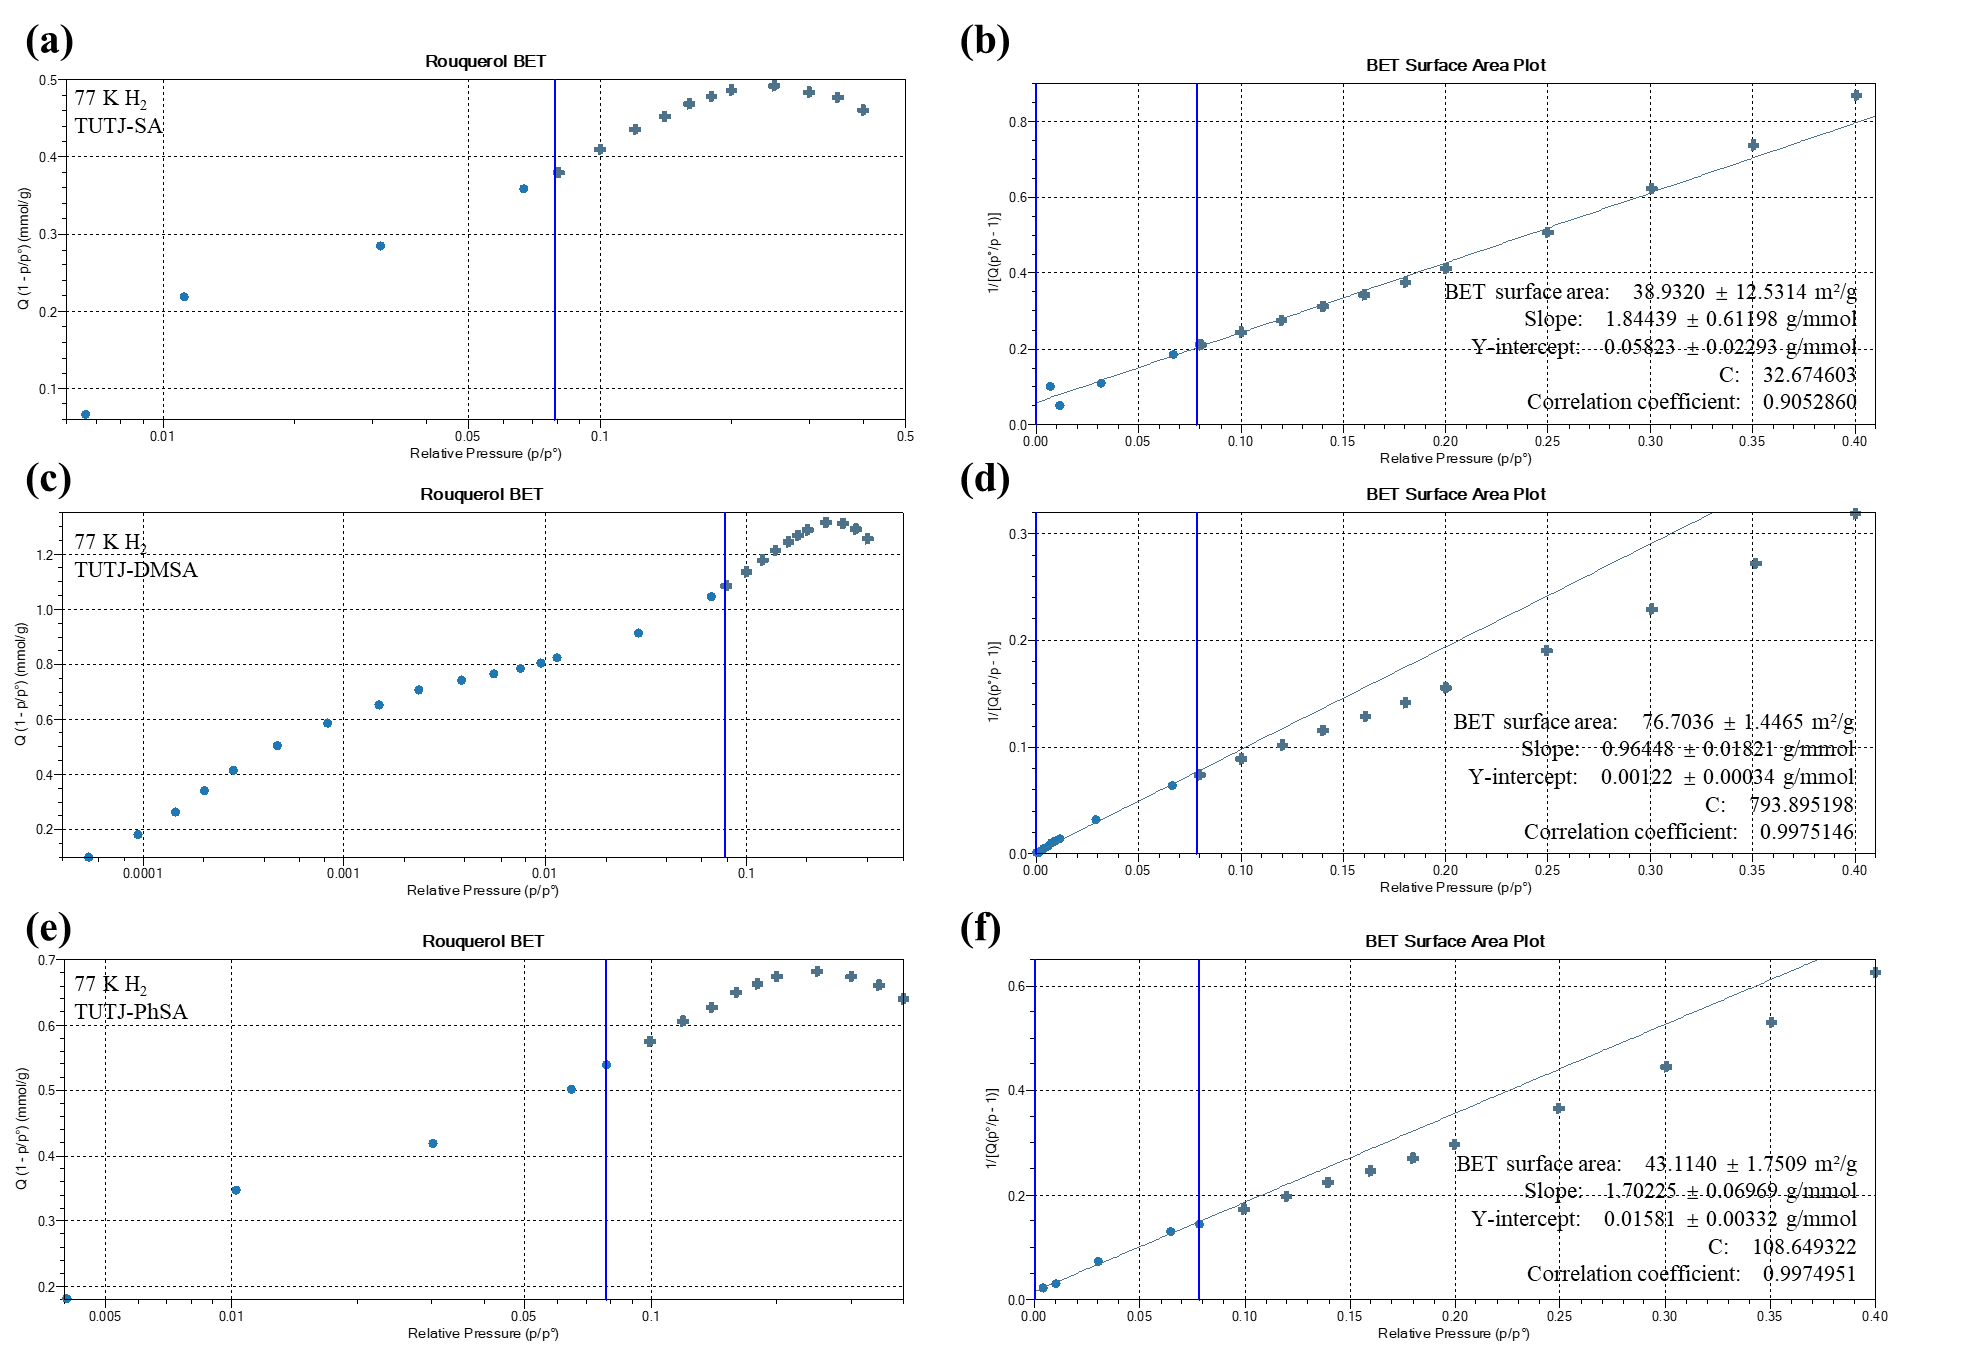


**Supplementary** Figure 14. BET surface area plot based on H2@77 K isotherm.


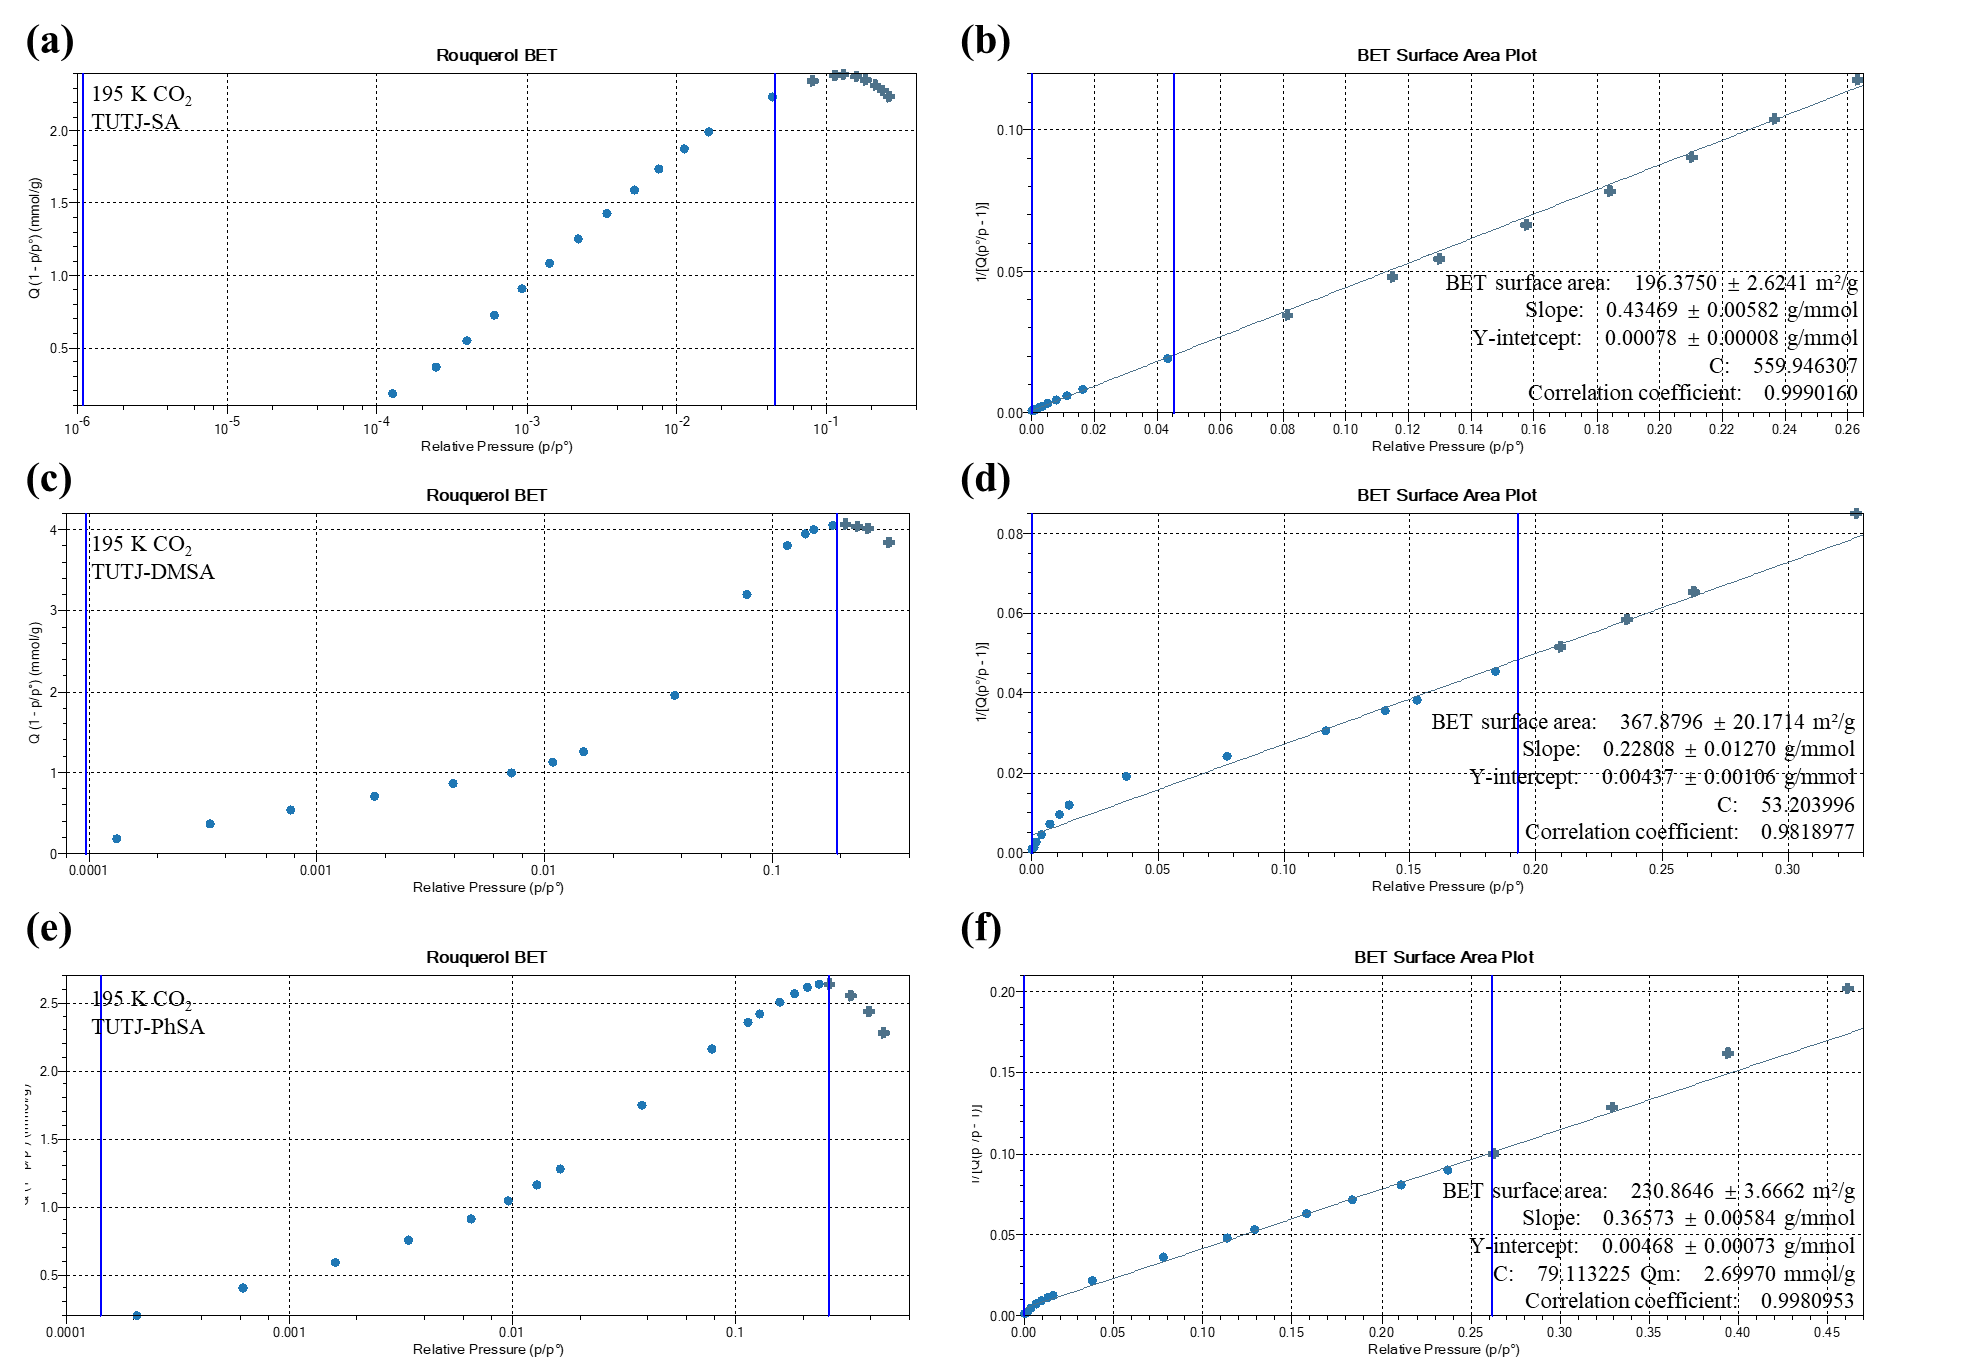


**Supplementary** Figure 15. BET surface area plot based on CO2@195 K isotherm.


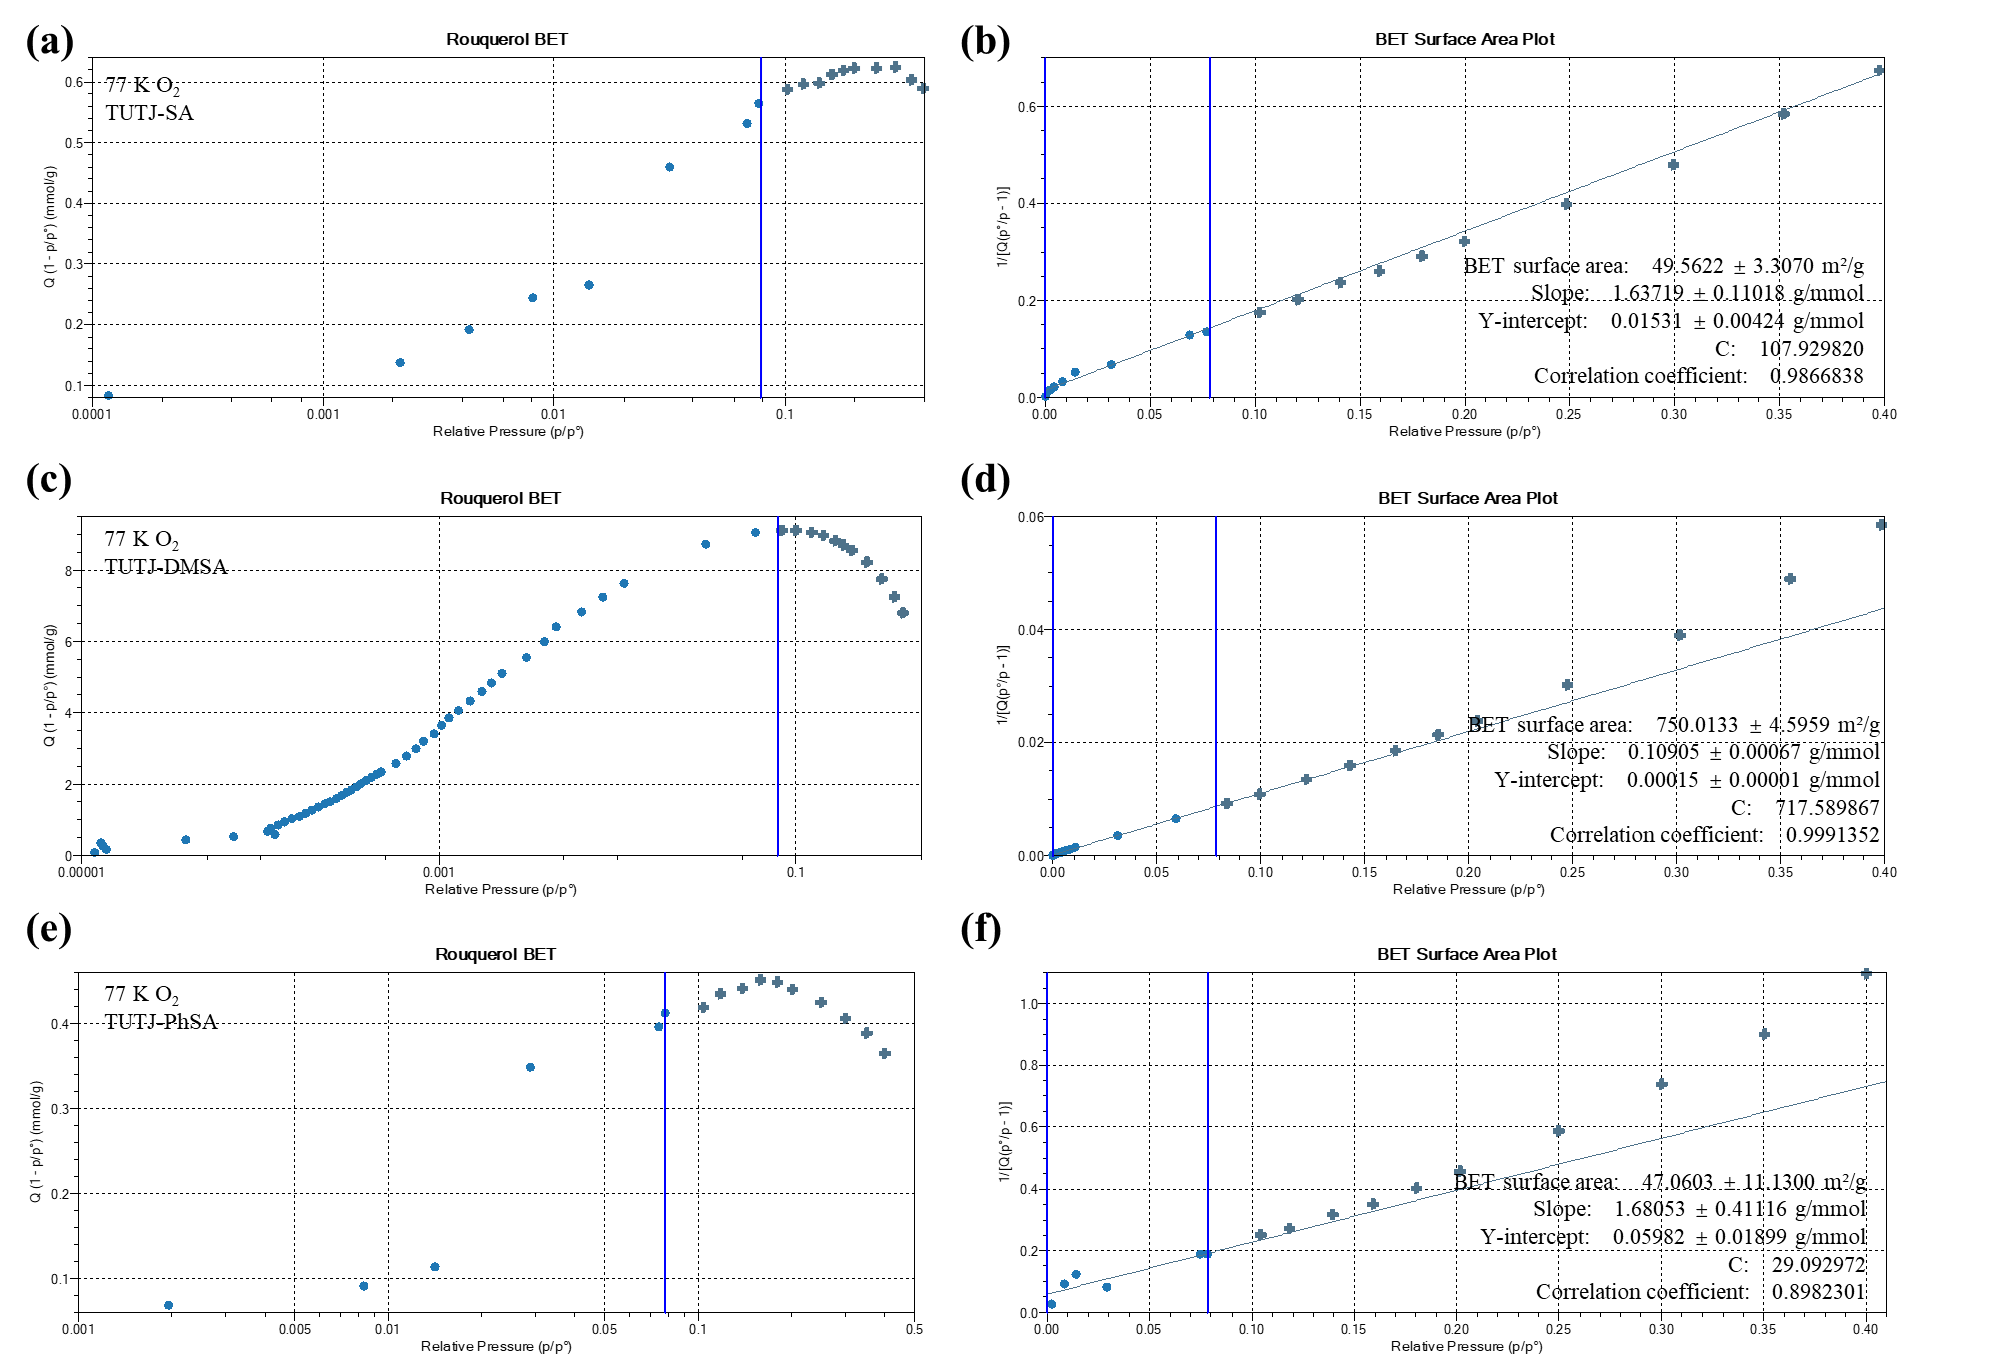


**Supplementary** Figure 16. BET surface area plot based on O2@77 K isotherm.


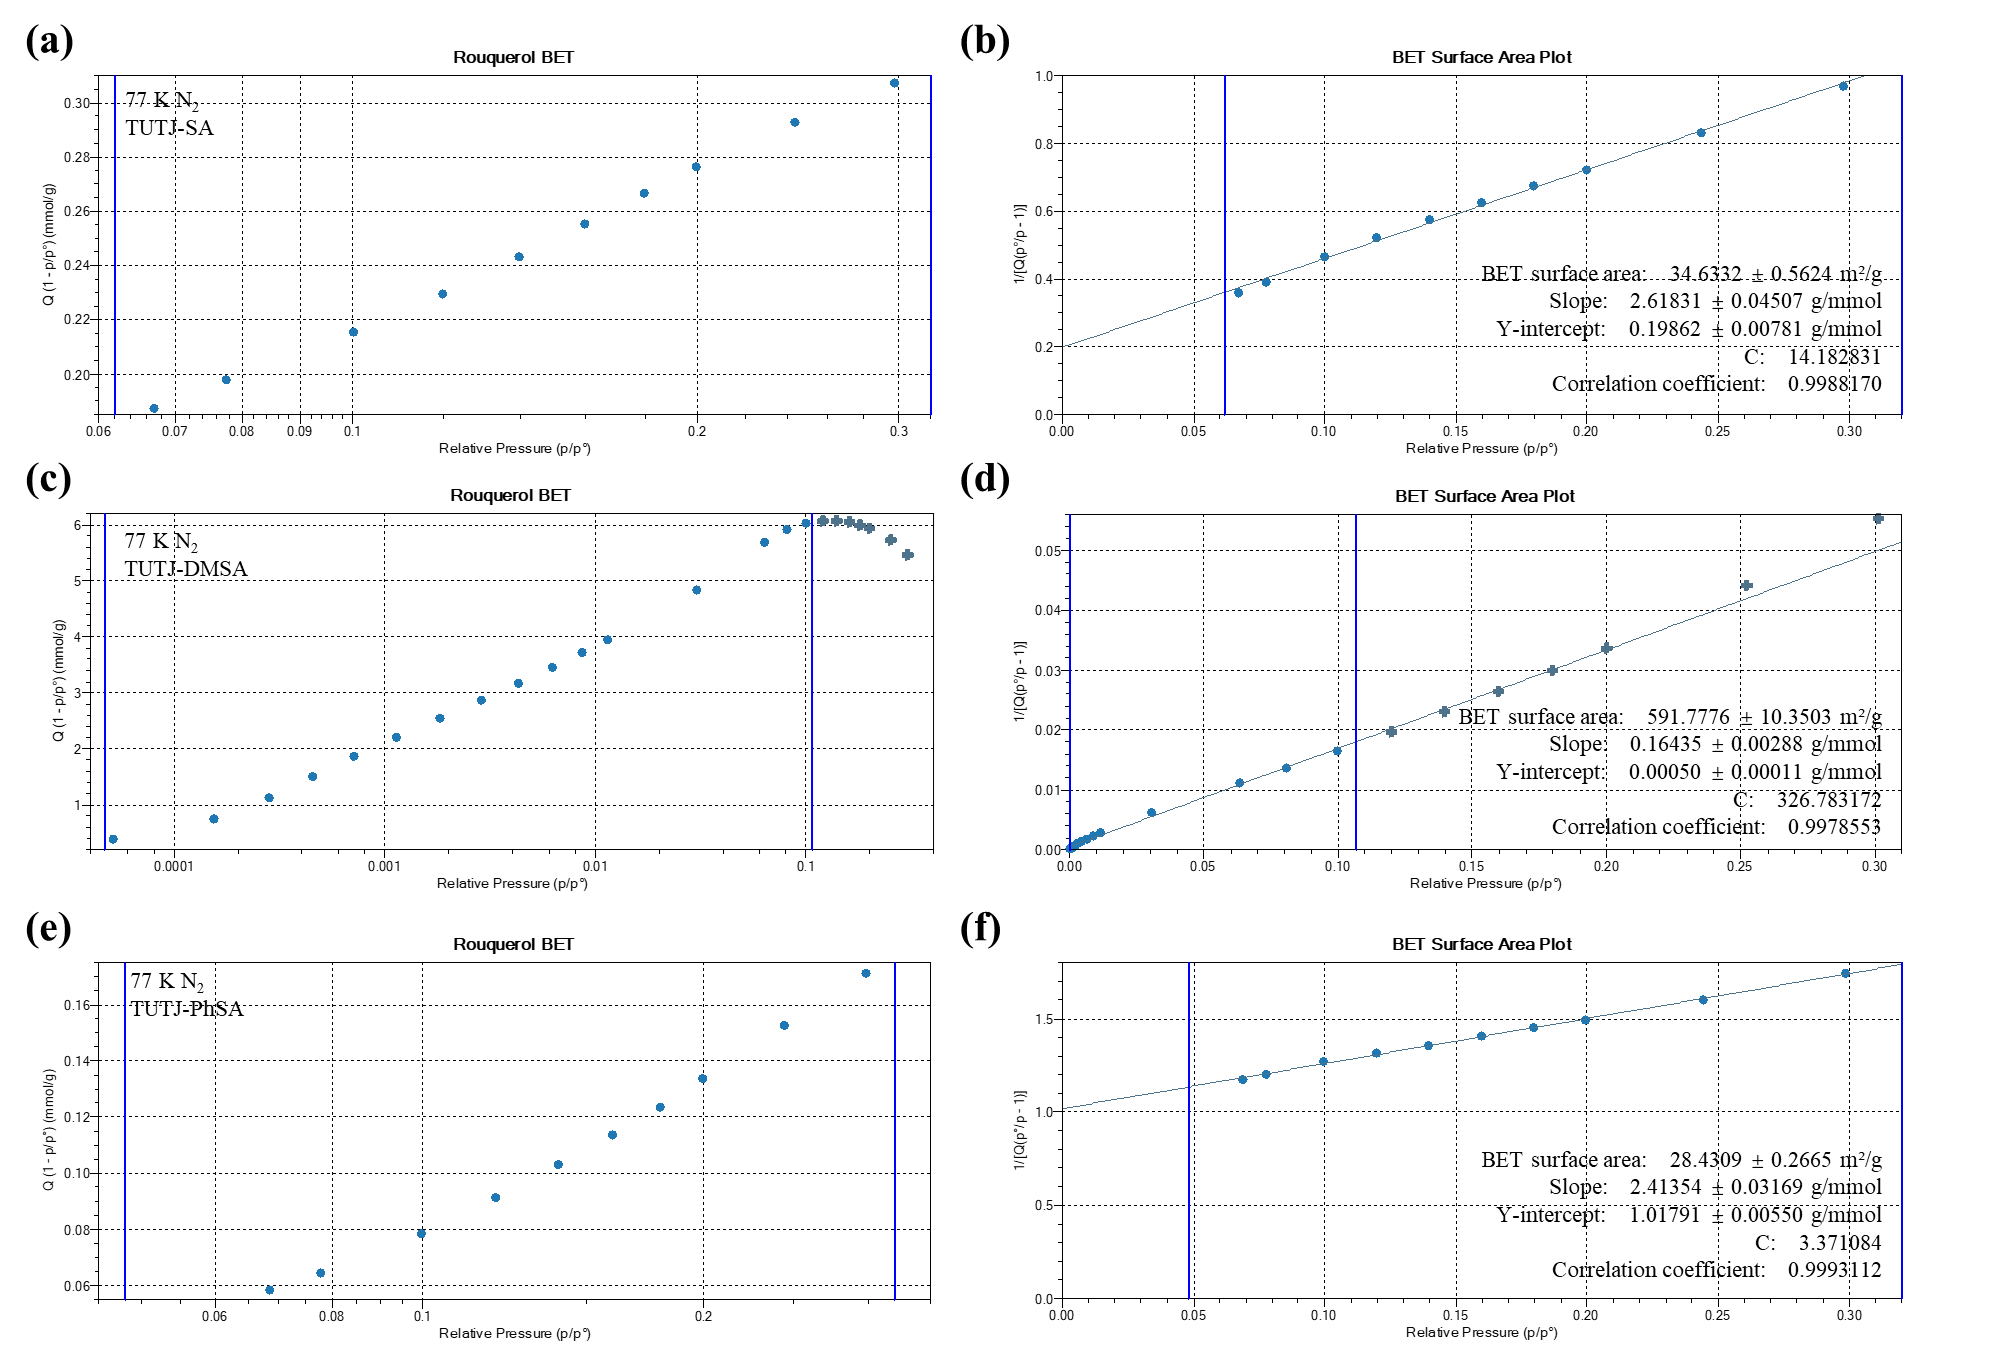


**Supplementary** Figure 17. BET surface area plot based on N2@77 K isotherm.


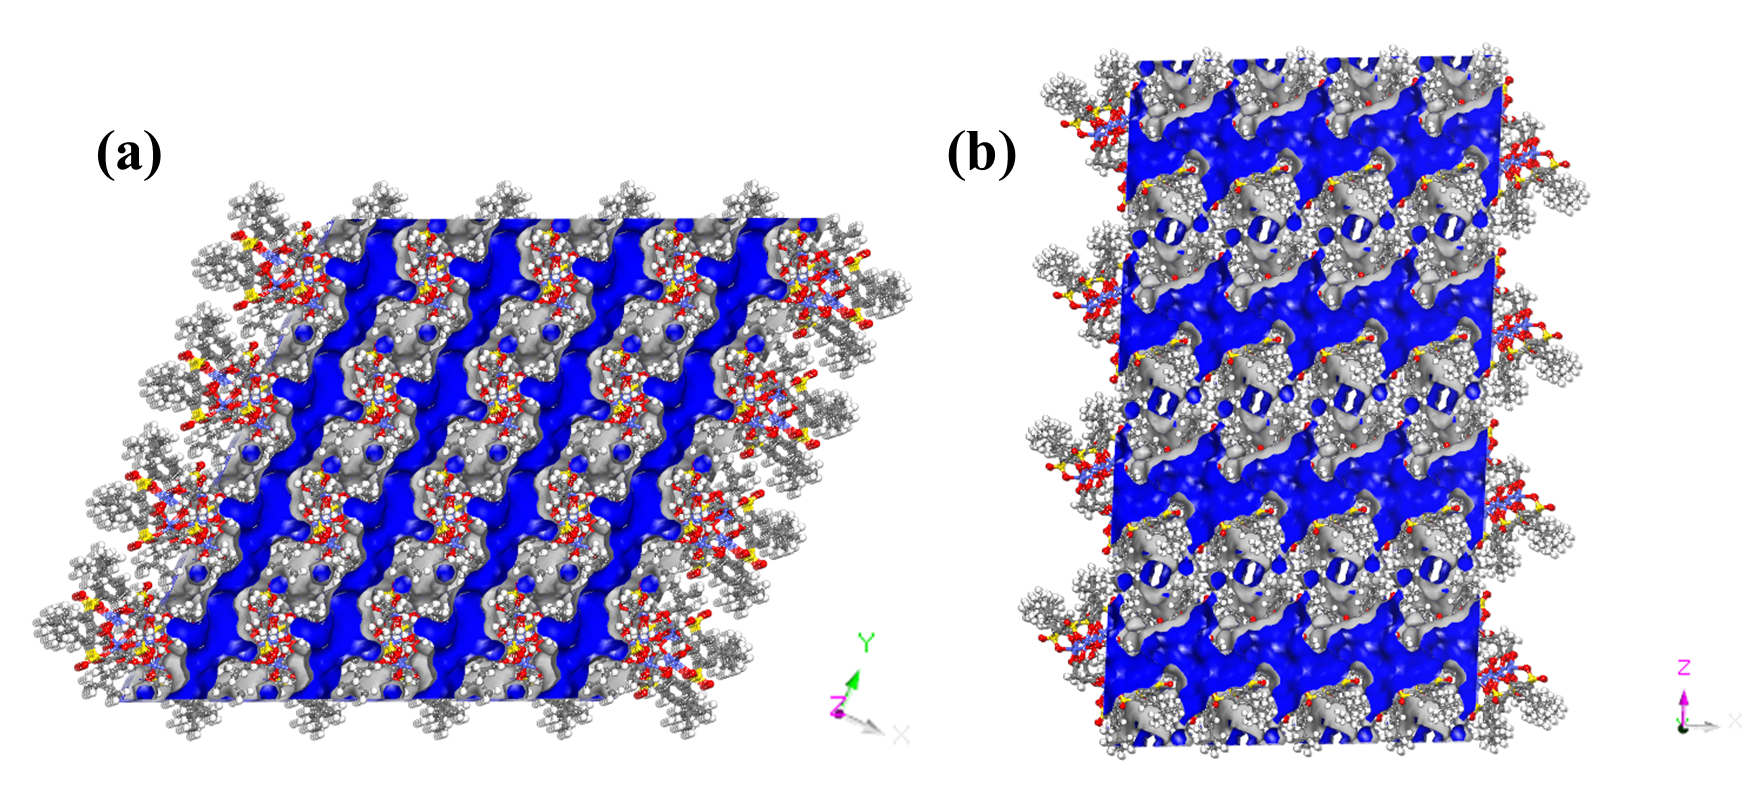


**Supplementary** Figure 18. Schematic diagram of pore distribution in directions for TUTJ-SA.


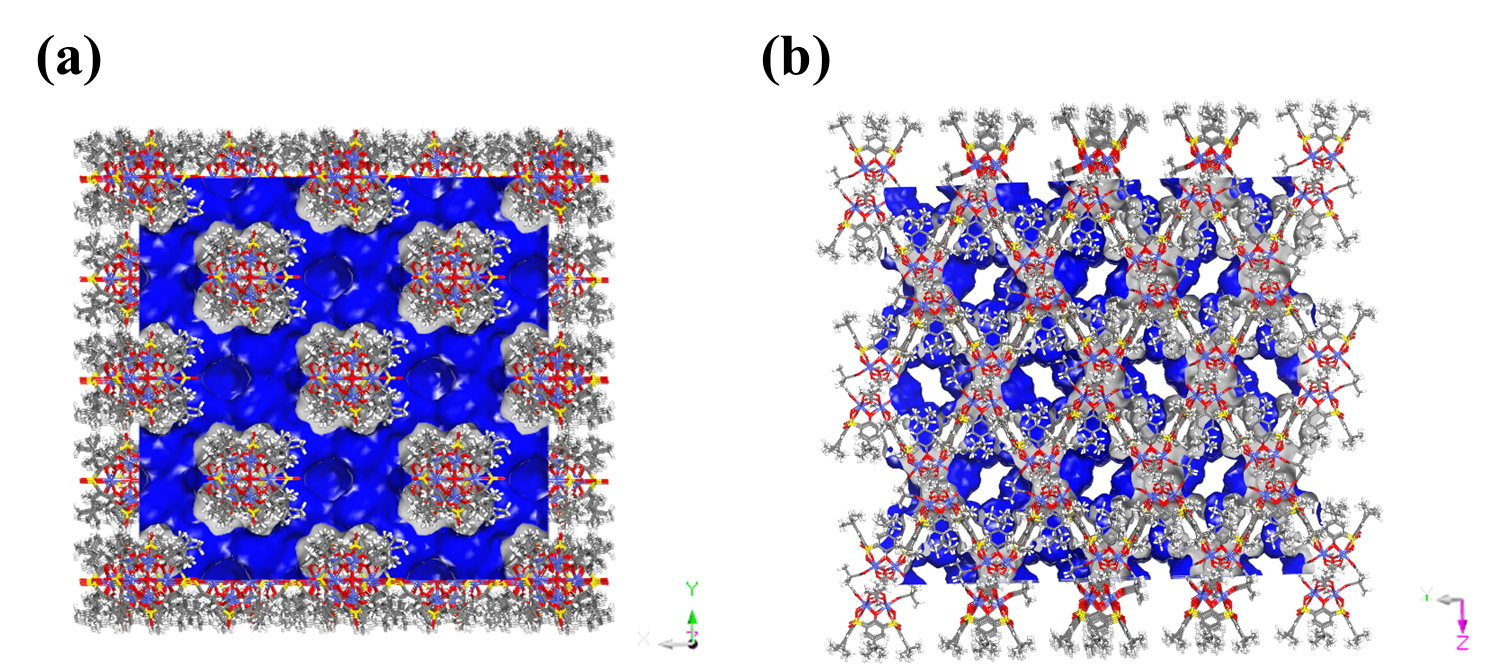


**Supplementary** Figure 19. Schematic diagram of pore distribution in directions for TUTJ-DMSA.


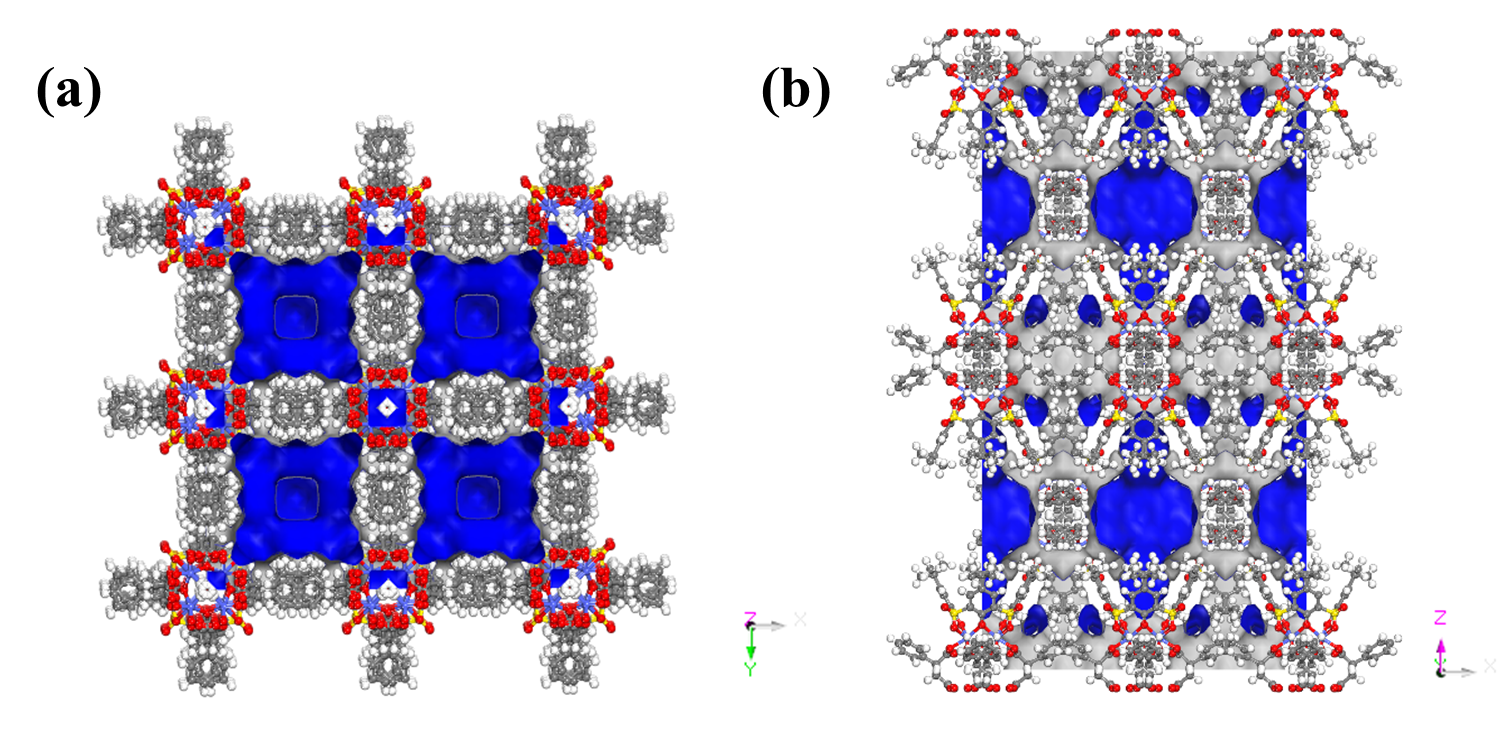


**Supplementary** Figure 20. Schematic diagram of pore distribution in directions for TUTJ-PhSA.


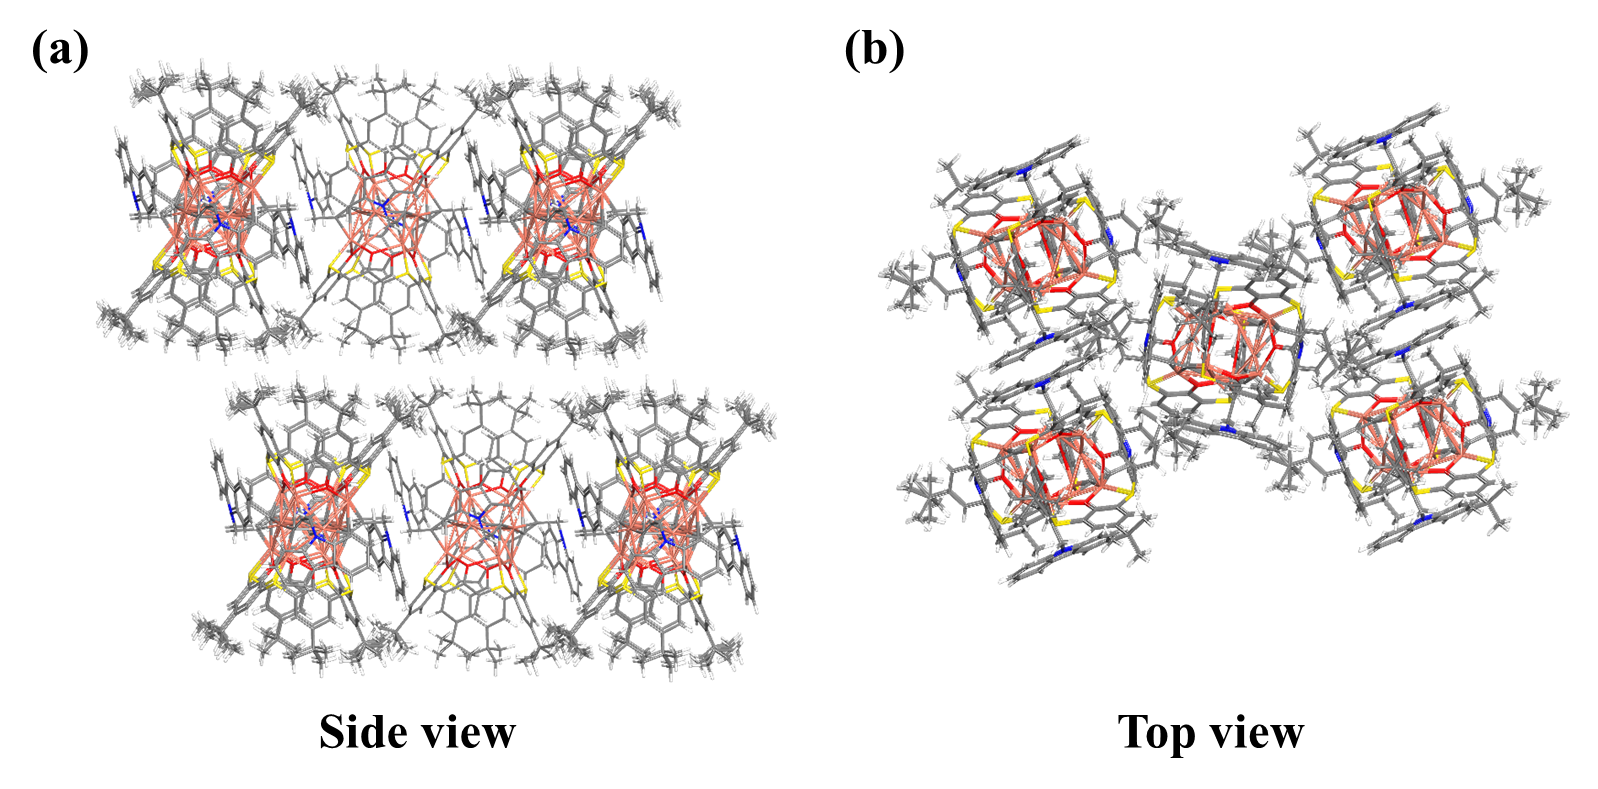


**Supplementary** Figure 21. Side (a) and top (b) views of the hierarchical packing arrangement of Cu12a-π.


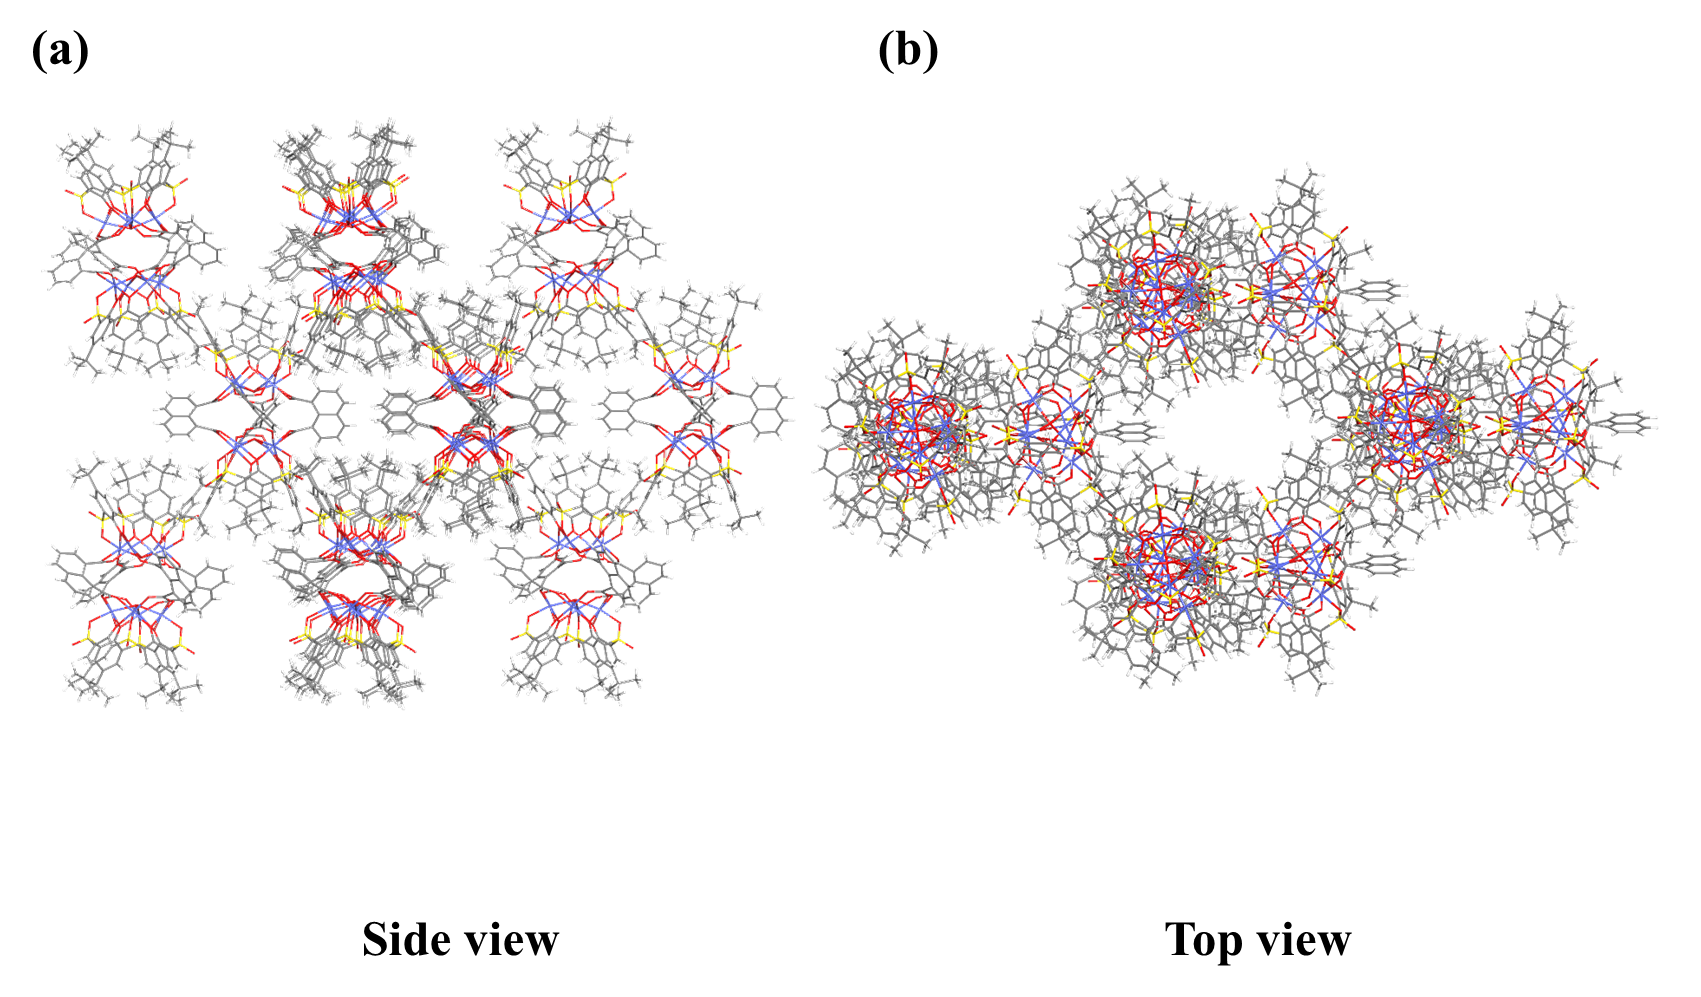


**Supplementary** Figure 22. Side (a) and top (b) views of the hierarchical packing arrangement of Co-NDC.


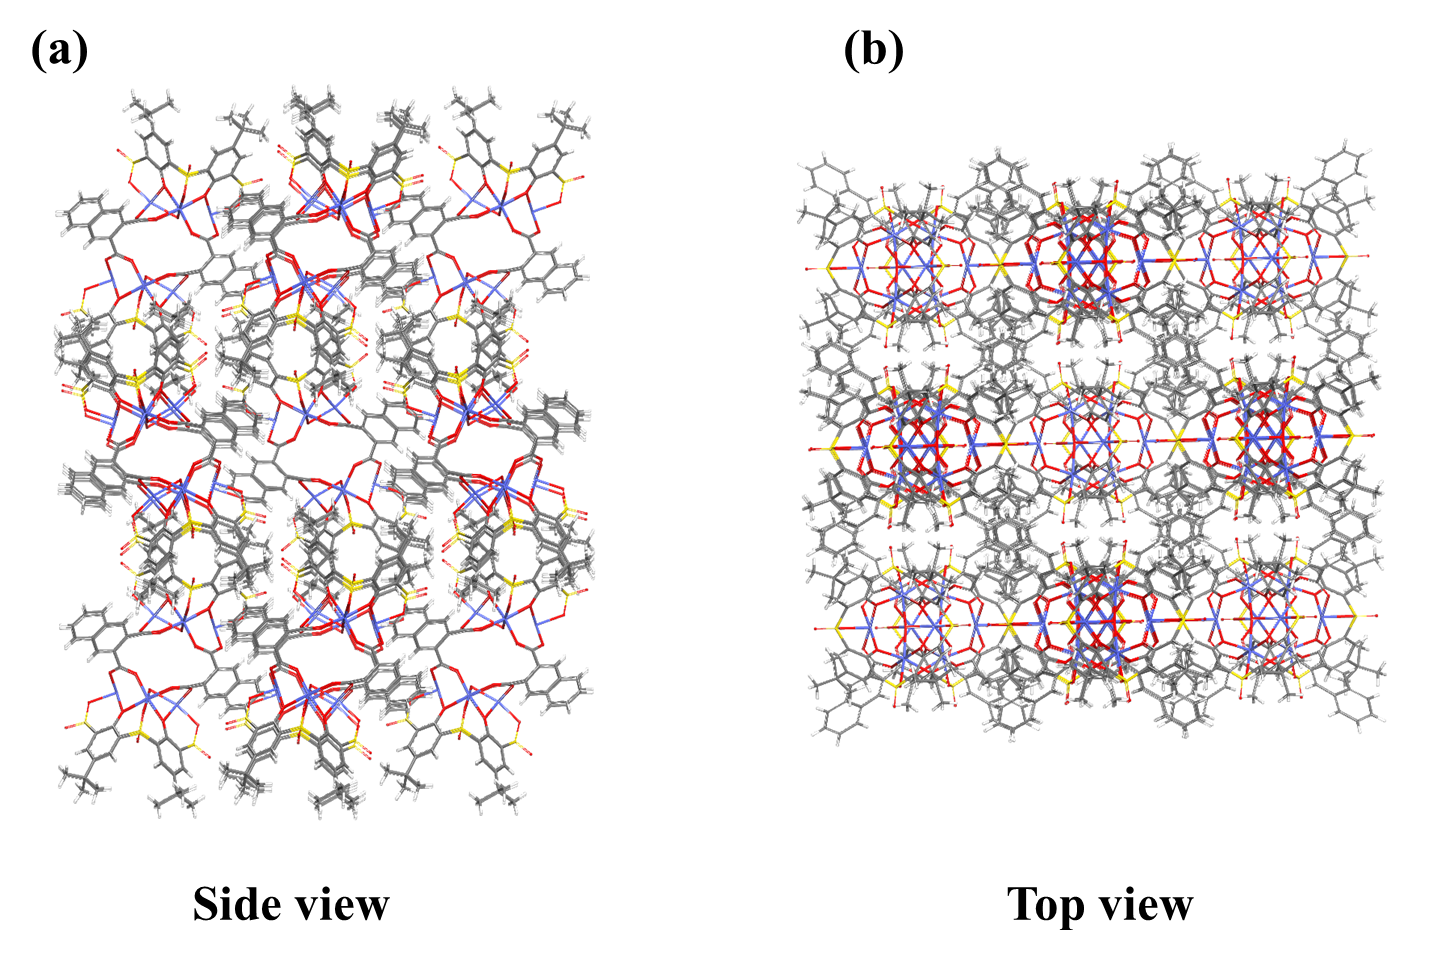


**Supplementary** Figure 23. Side (a) and top (b) views of the hierarchical packing arrangement of Co-2,3-NDC.


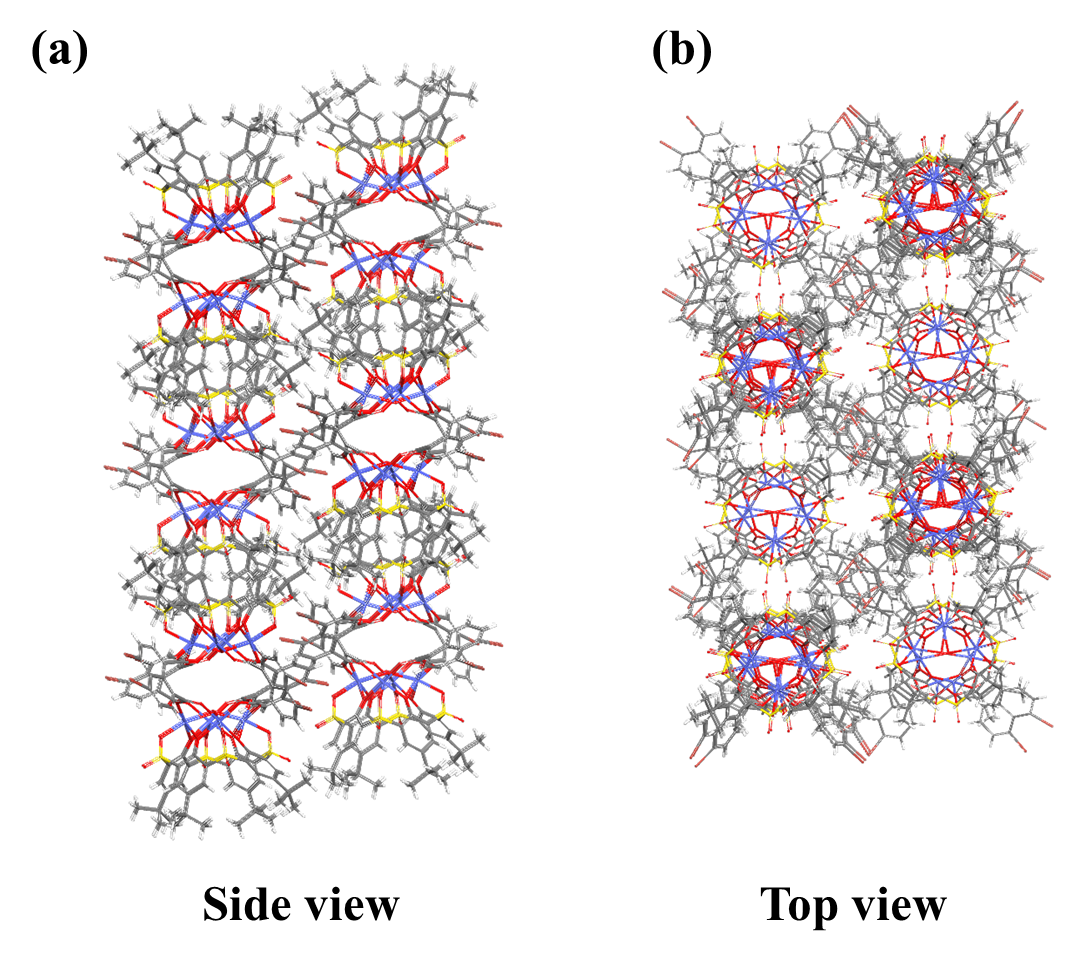


**Supplementary** Figure 24. Side (a) and top (b) views of the hierarchical packing arrangement of Co-NDC-Br.


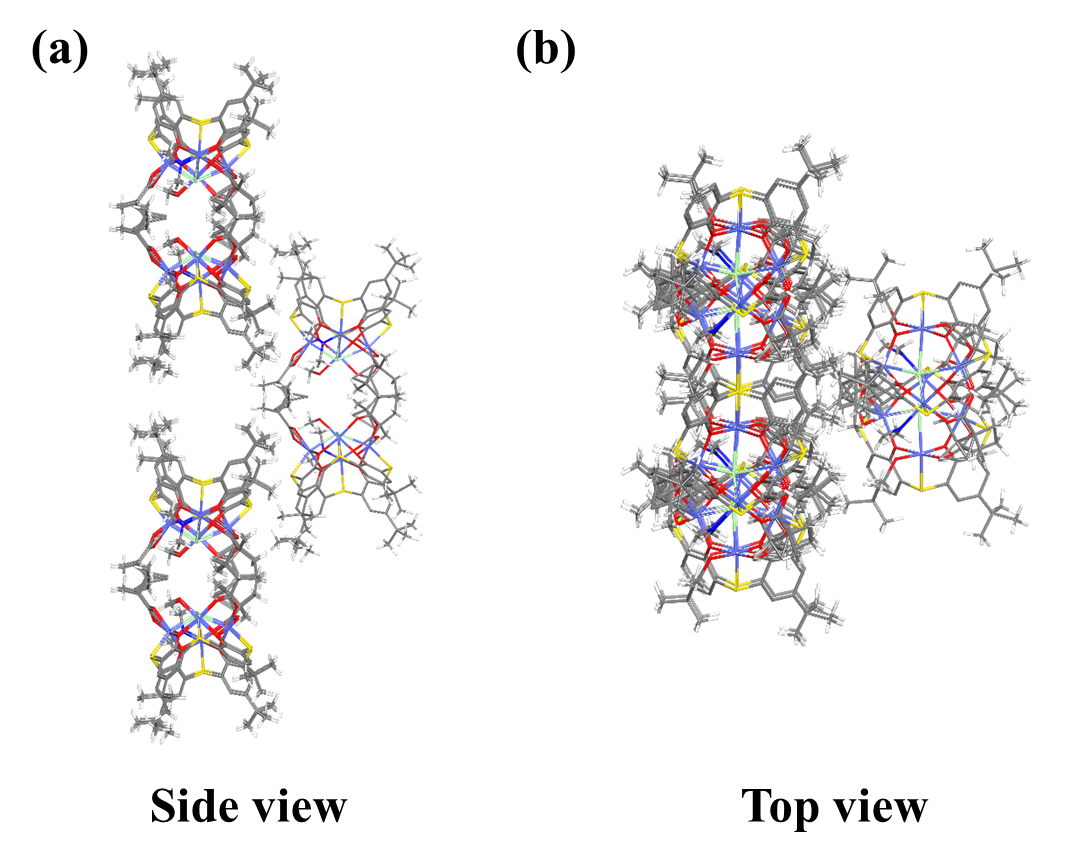


**Supplementary** Figure 25. Side (a) and top (b) views of the hierarchical packing arrangement of Co-CAM.


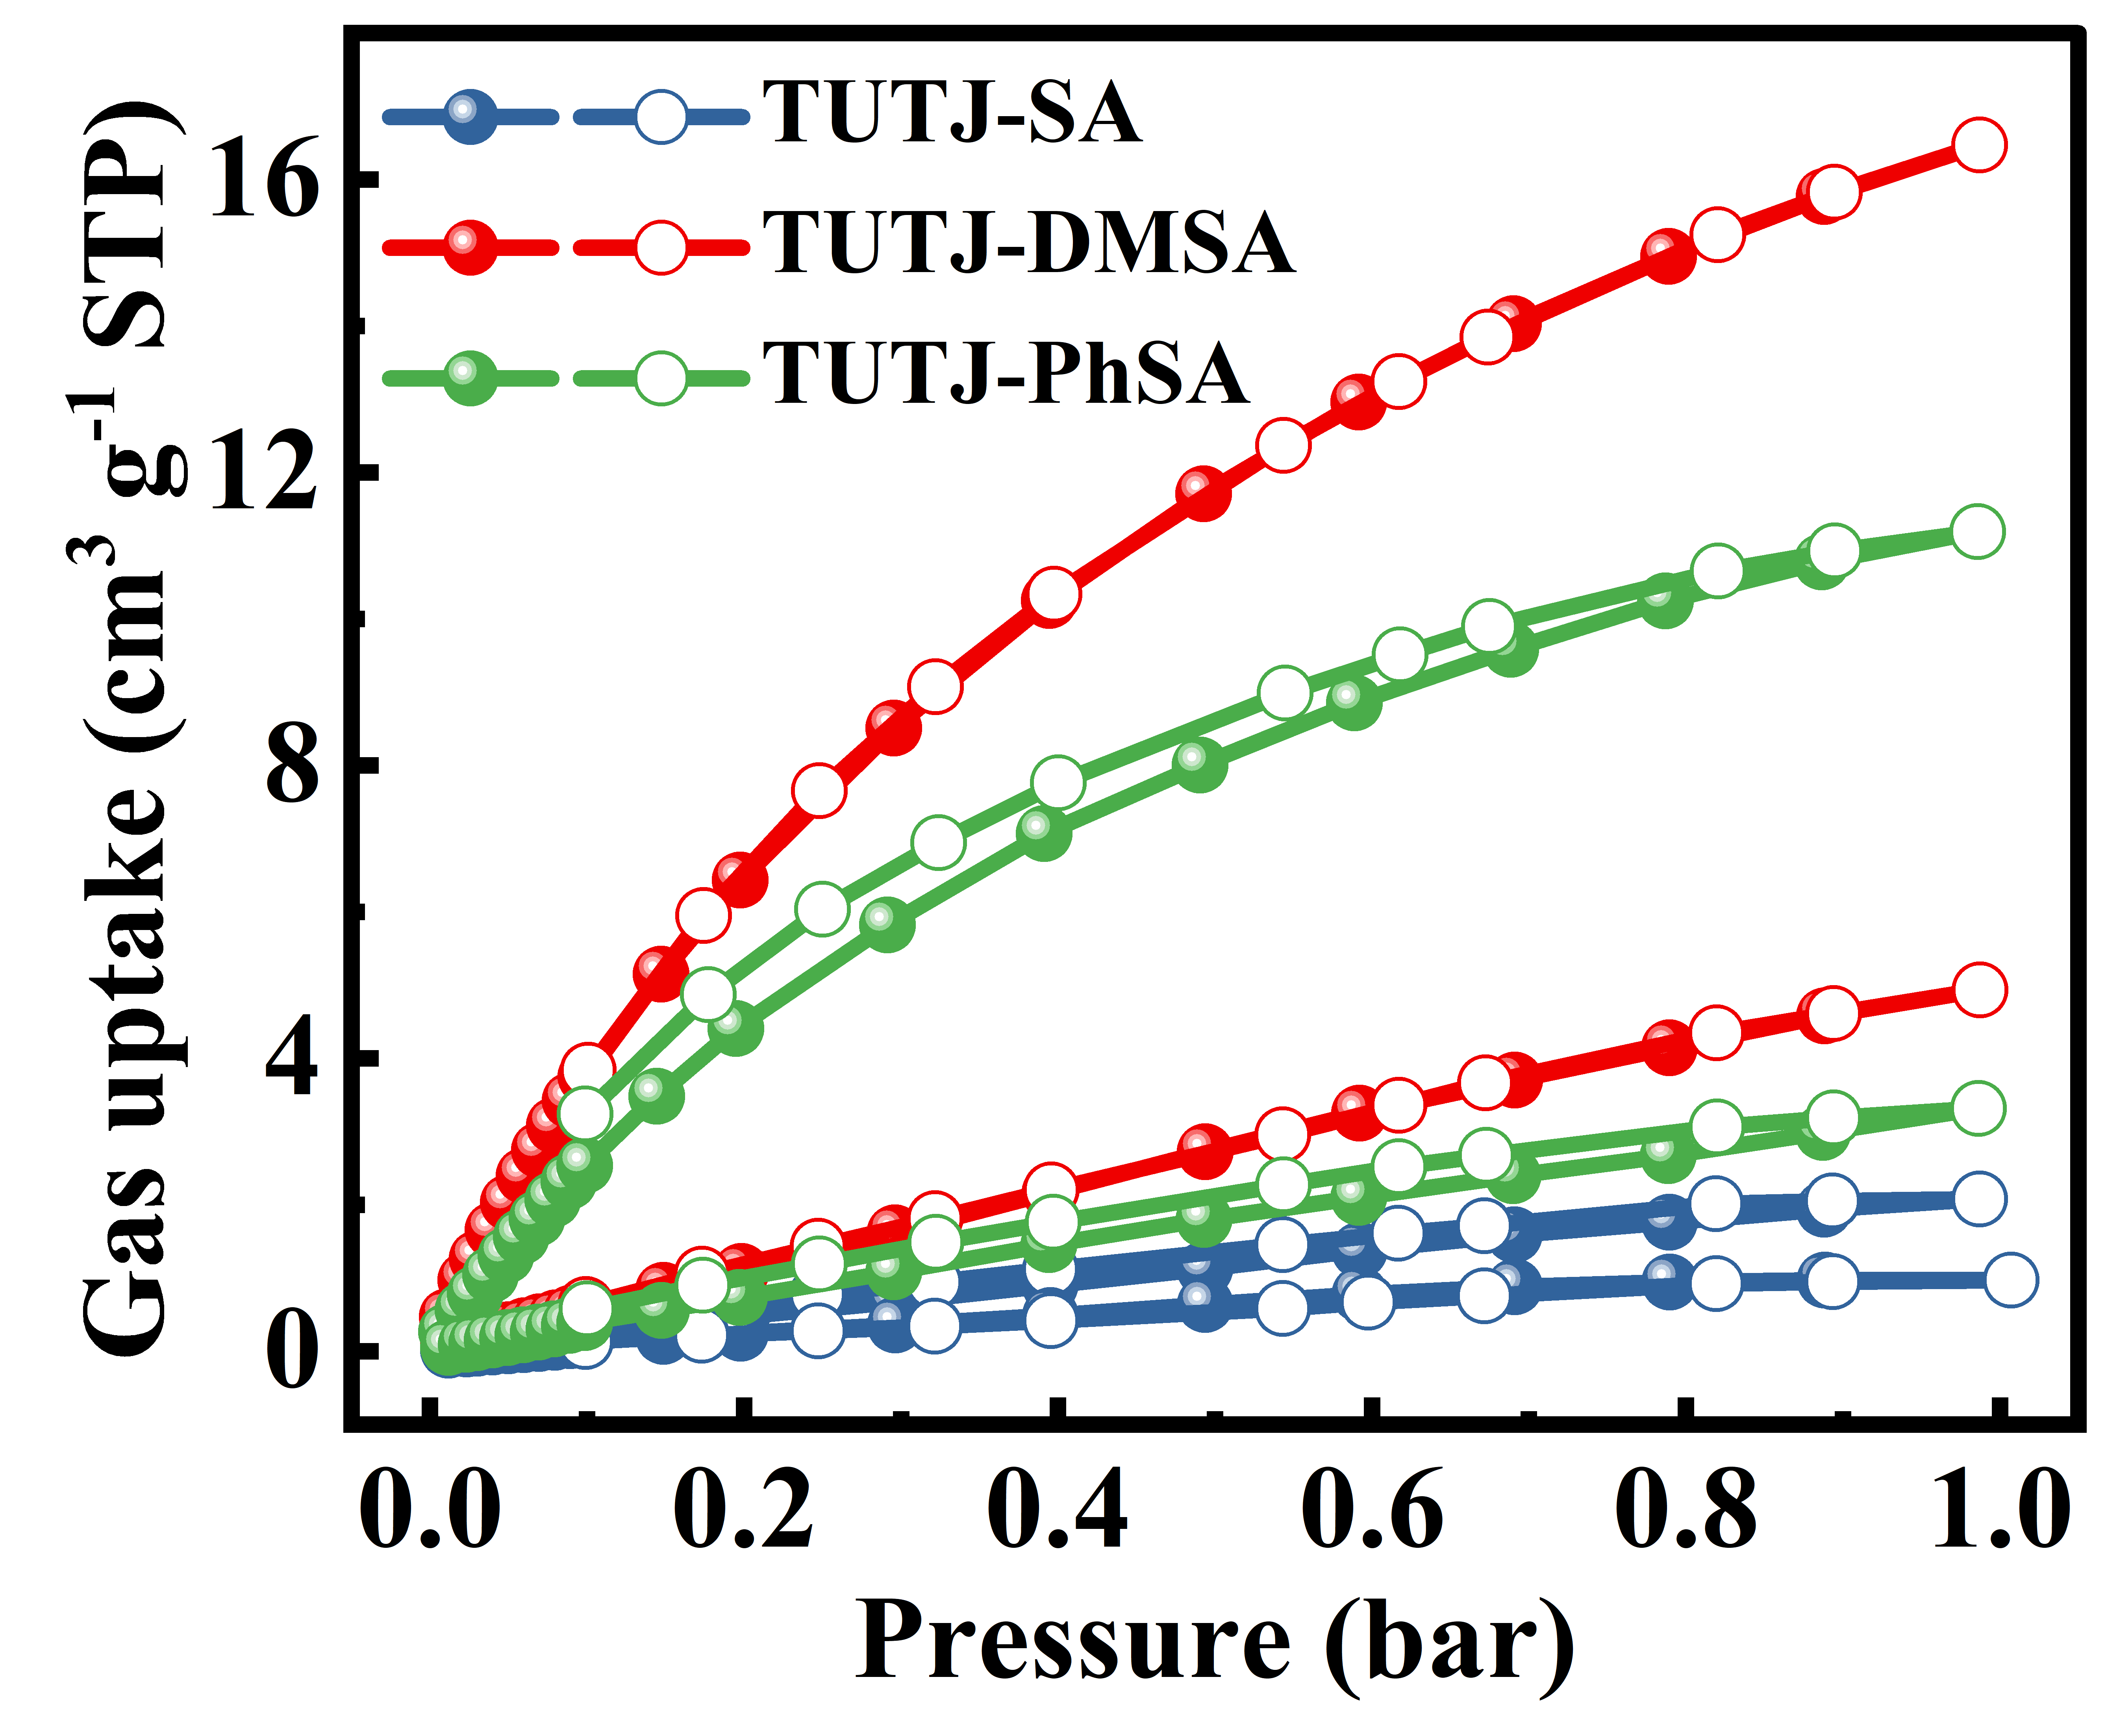


**Supplementary** Figure 26. Single-component CH4 and N2 adsorption isotherms of TUTJ-series MOFs at 298 K and 0–1 bar.


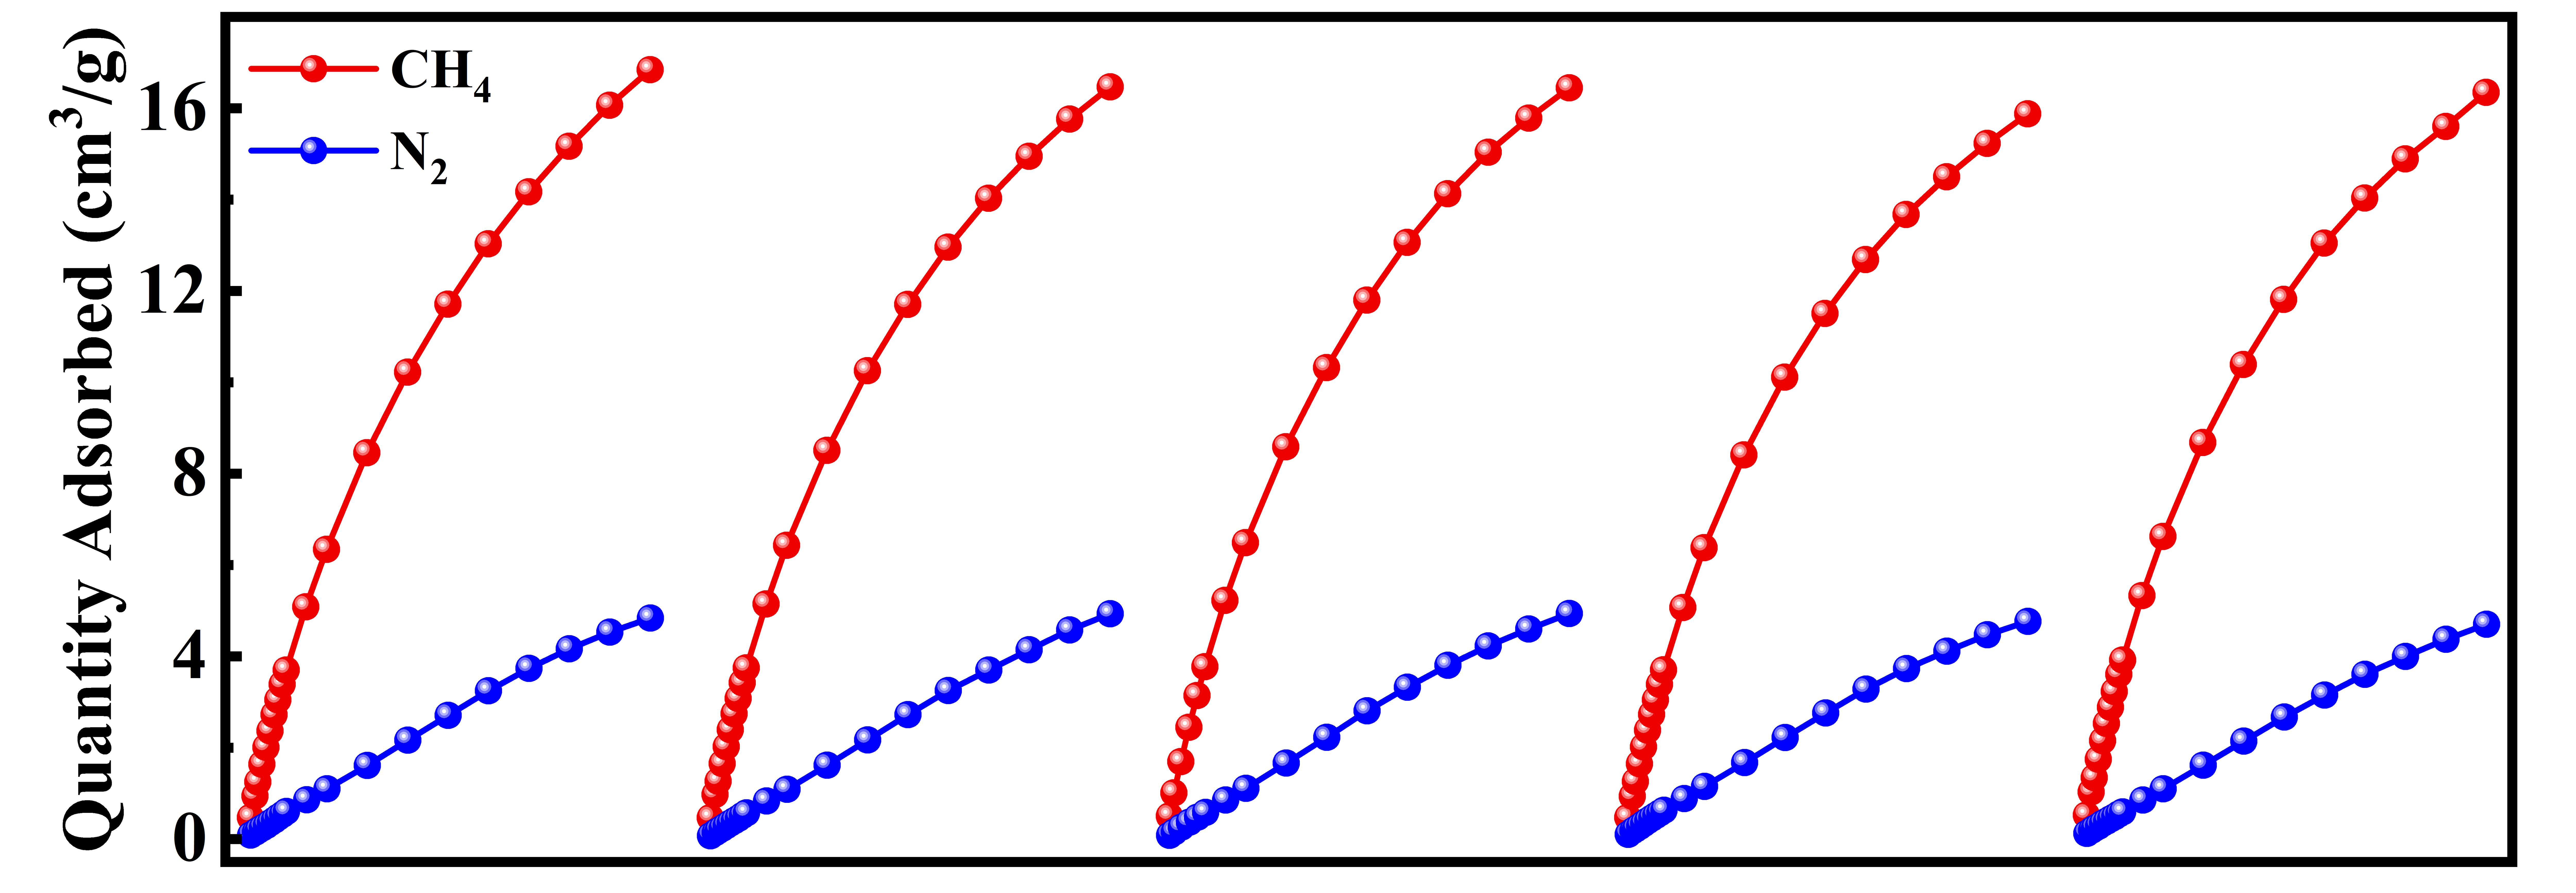


**Supplementary** Figure 27. Reusability test of TUTJ-DMSA for CH4/N2 separation: five consecutive cycles of CH4 (red) and N2 (blue) adsorption isotherms at 298 K and 0–1 bar.


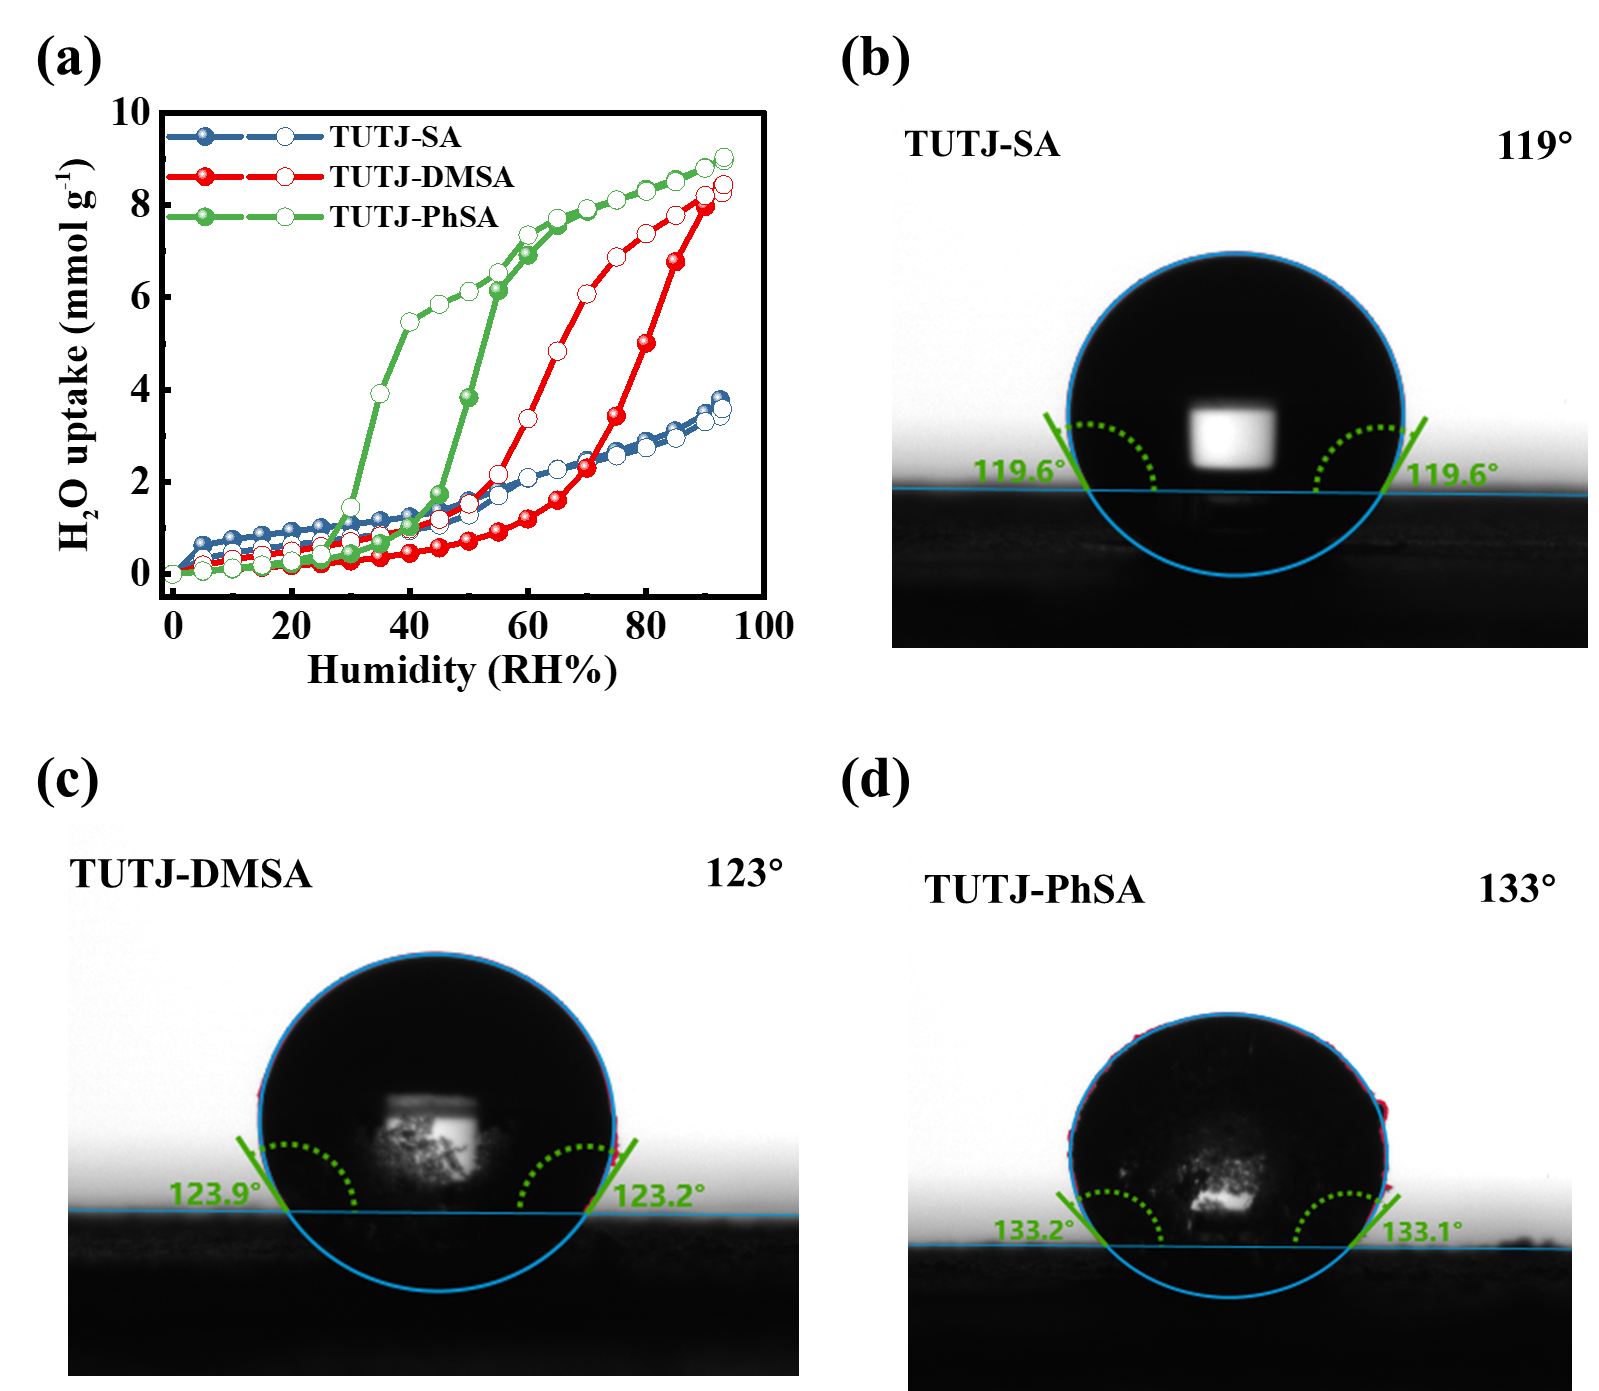


**Supplementary** Figure 28. Water vapor adsorption and surface wettability of TUTJ-series MOFs. (a) Water vapor adsorption isotherms of TUTJ-SA (blue), TUTJ-DMSA (red), and TUTJ-PhSA (green) at 298 K across 0–100% relative humidity (RH). (b–d) Water contact angle images of (b) TUTJ-SA, (c) TUTJ-DMSA, and (d) TUTJ-PhSA.


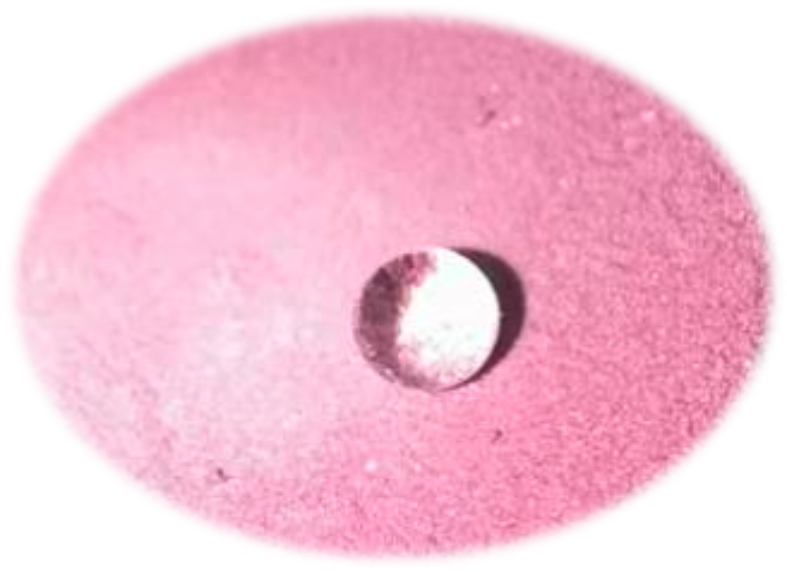


**Supplementary** Figure 29. Photograph of a water droplet on a compacted pellet of TUTJ-DMSA.


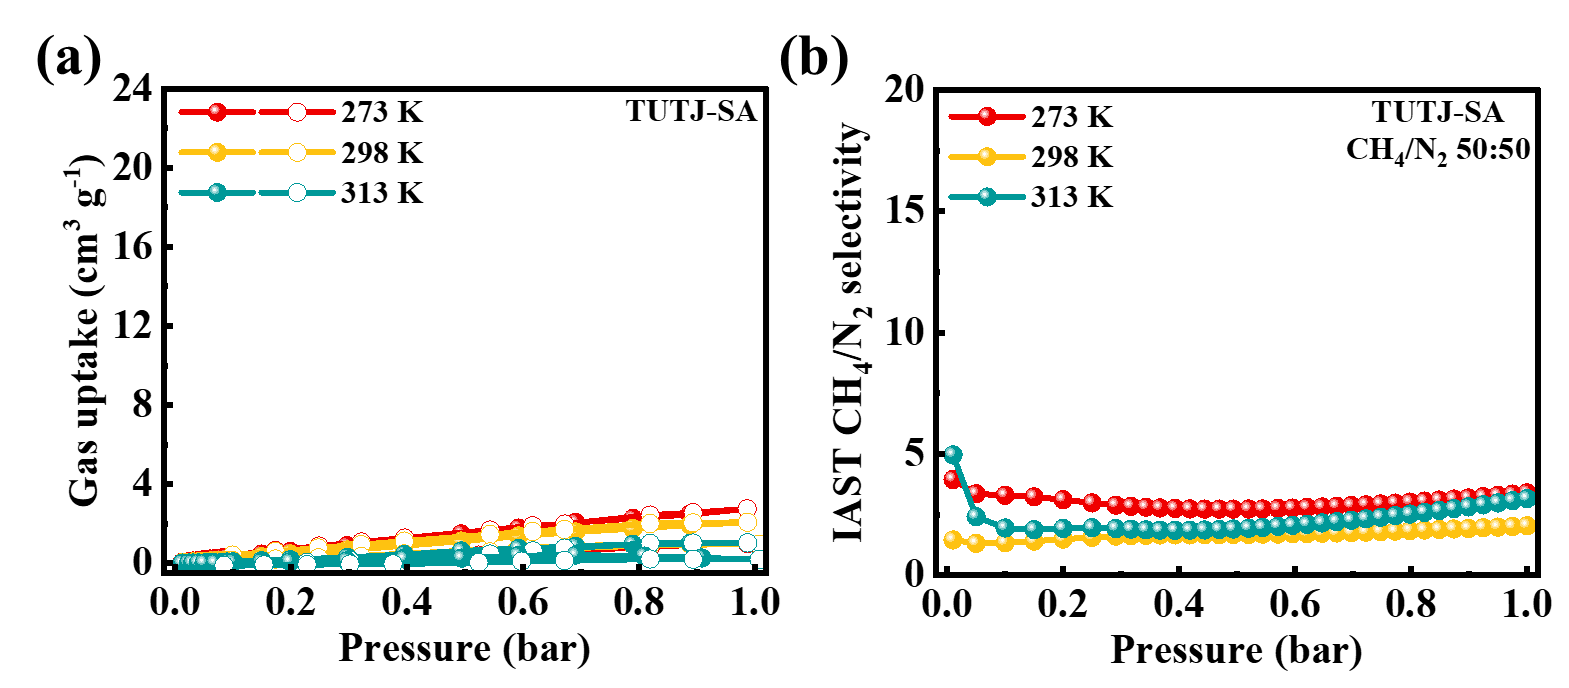


**Supplementary** Figure 30. (a) Single-component CH4 and N2 adsorption isotherms of TUTJ-SA at 273 K, 298 K, and 313 K, and (b) corresponding IAST-calculated CH4/N2 selectivity for an equimolar 50:50 mixture.


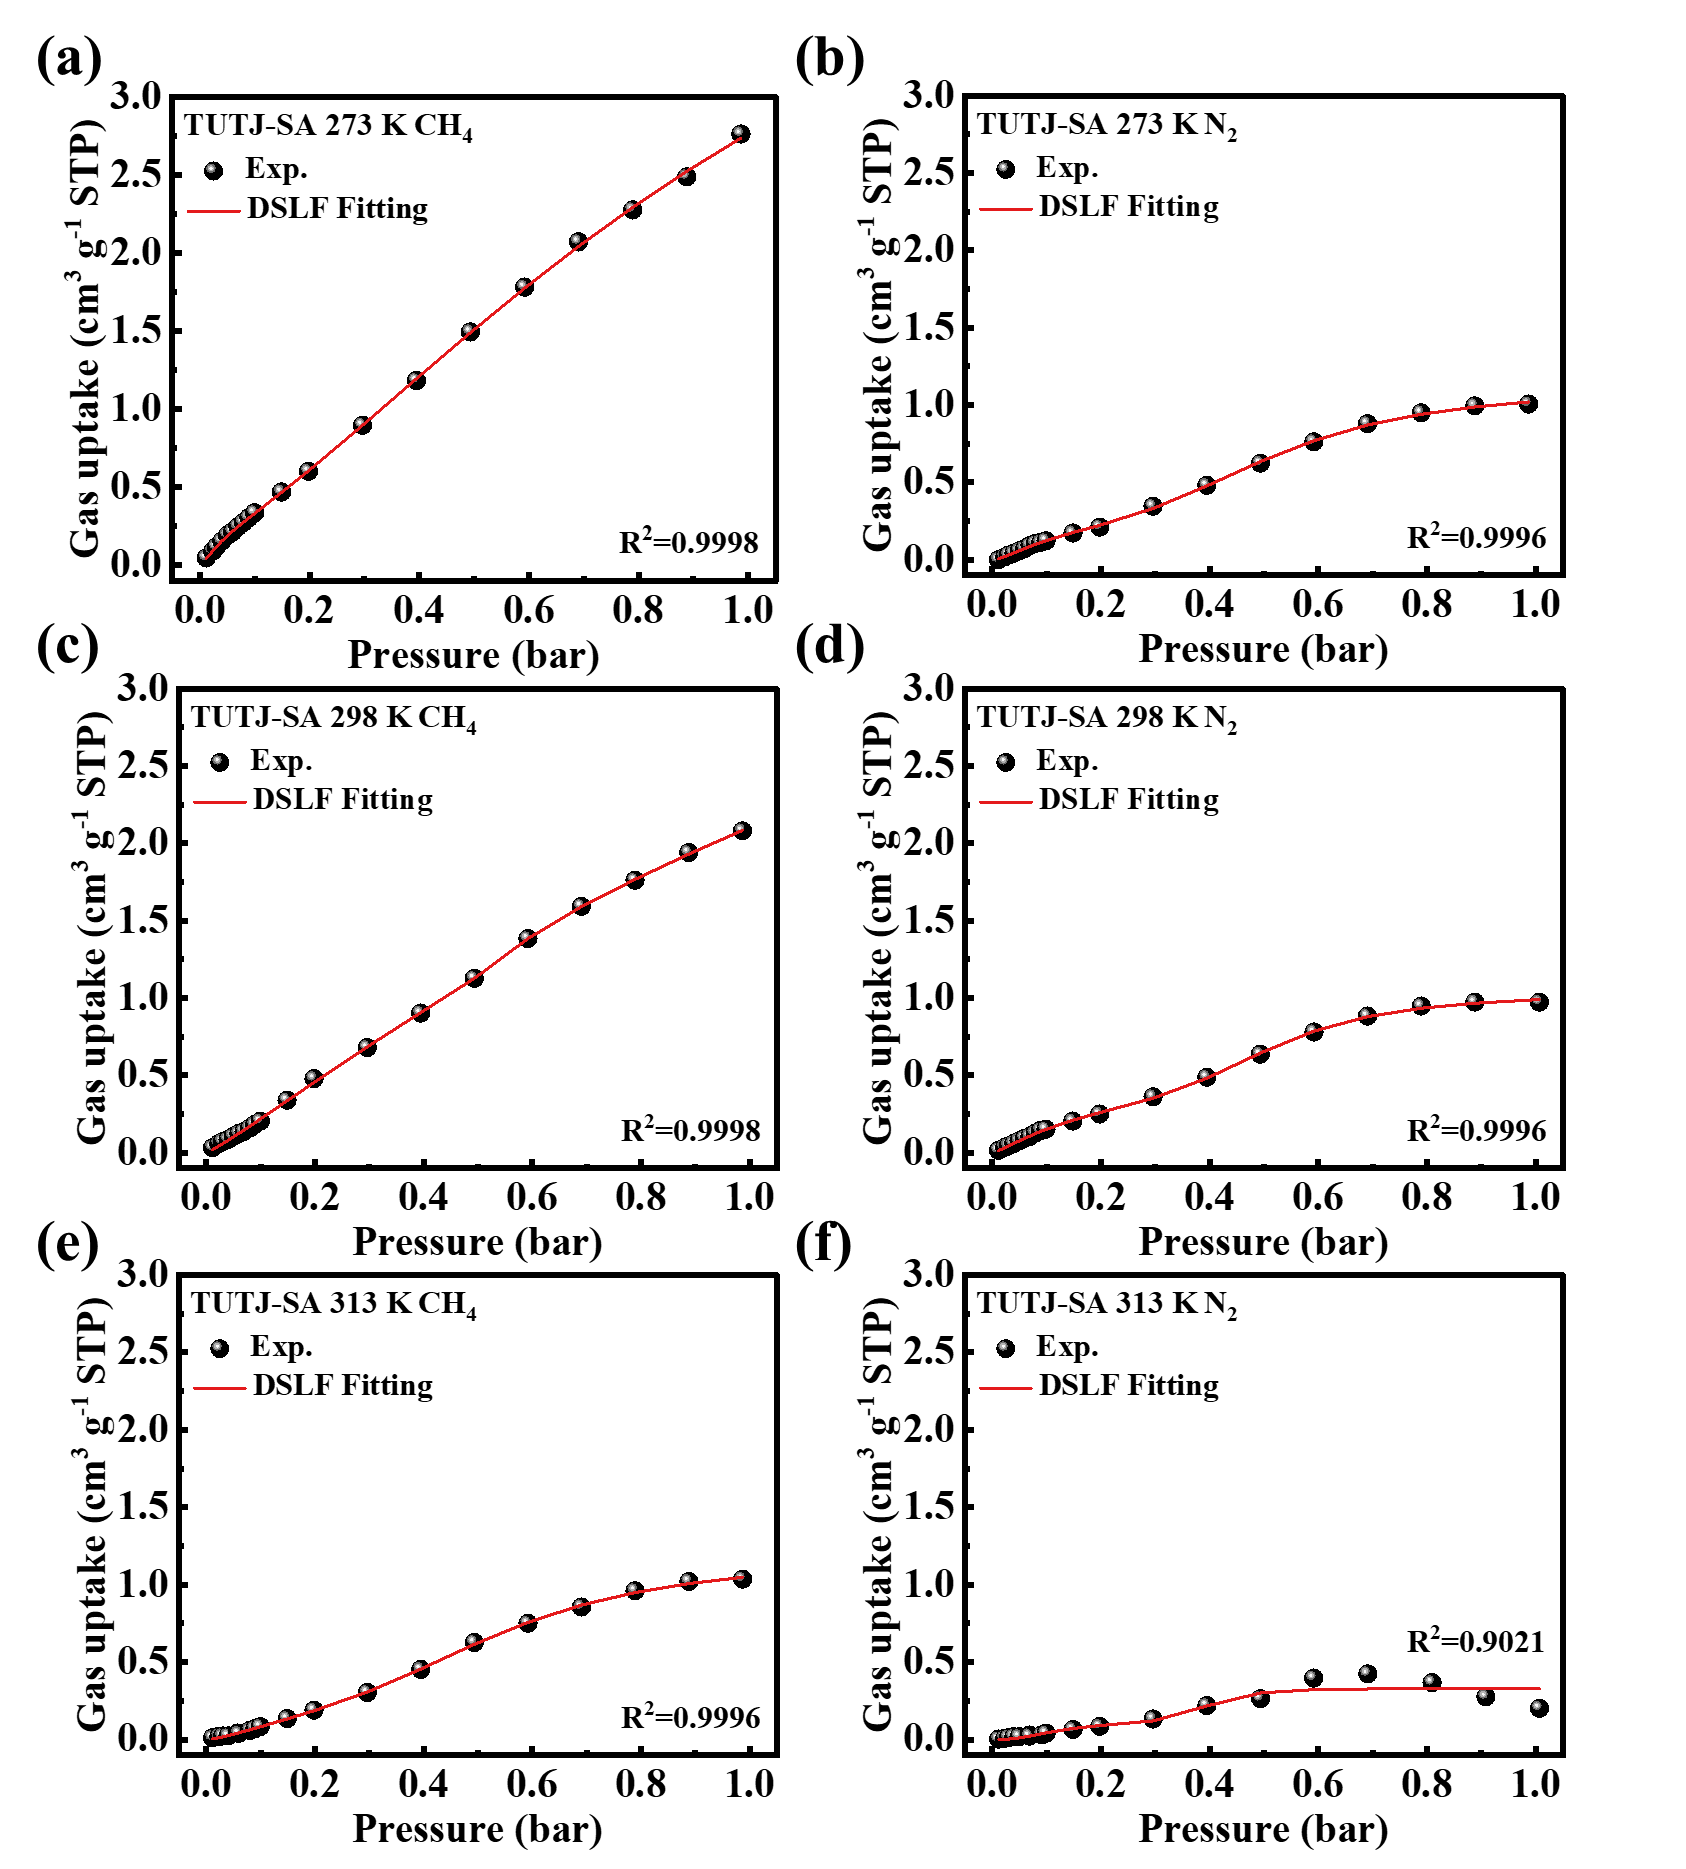


**Supplementary** Figure 31. CH4 and N2 adsorption isotherms at 273 K(a,b), 298 K(c,d), and 313 K(e,f) in TUTJ-SA with dual-site Langmuir-Freundlich model fits.


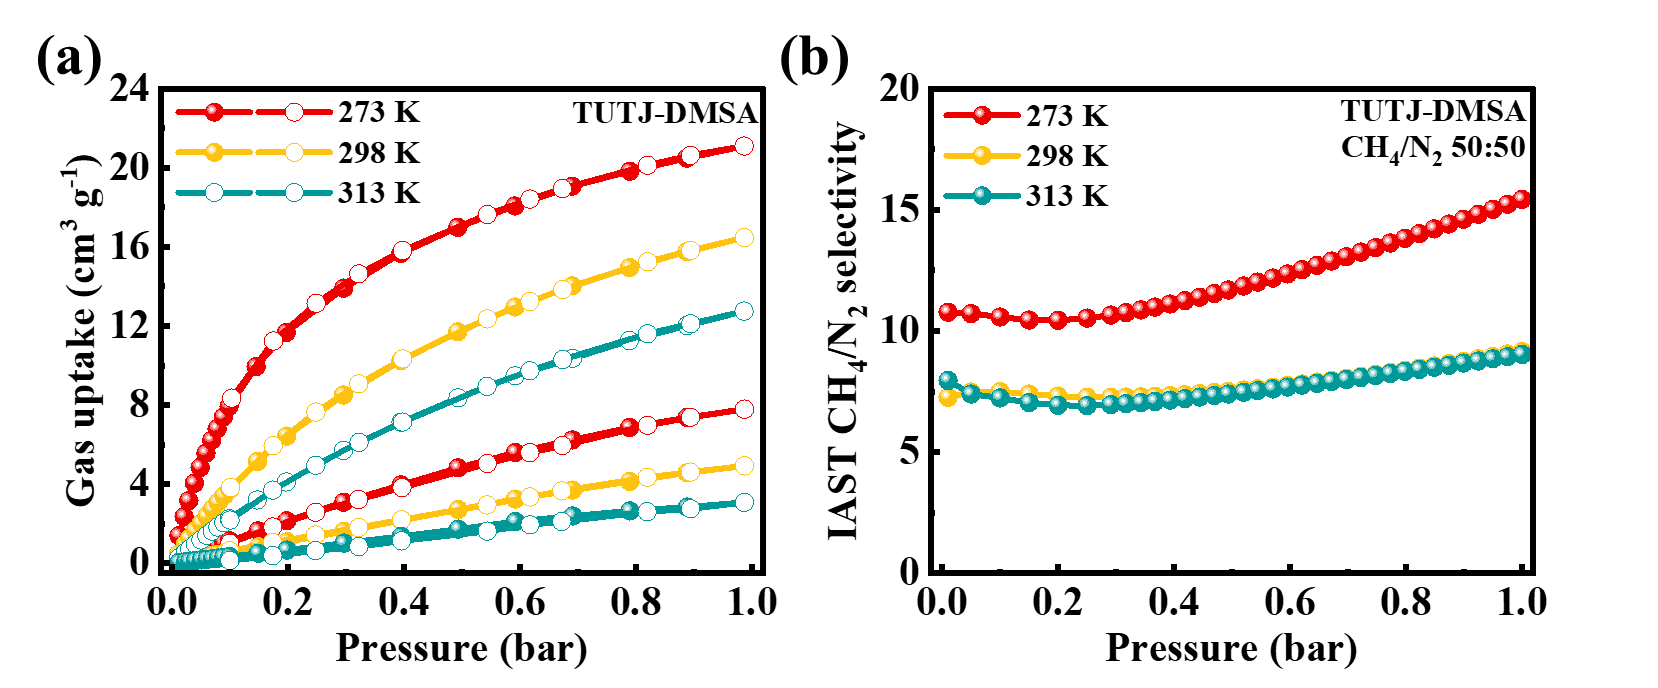


**Supplementary** Figure 32. (a) Single-component CH4 and N2 adsorption isotherms of TUTJ-DMSA at 273 K, 298 K, and 313 K, and (b) corresponding IAST-calculated CH4/N2 selectivity for an equimolar 50:50 mixture.


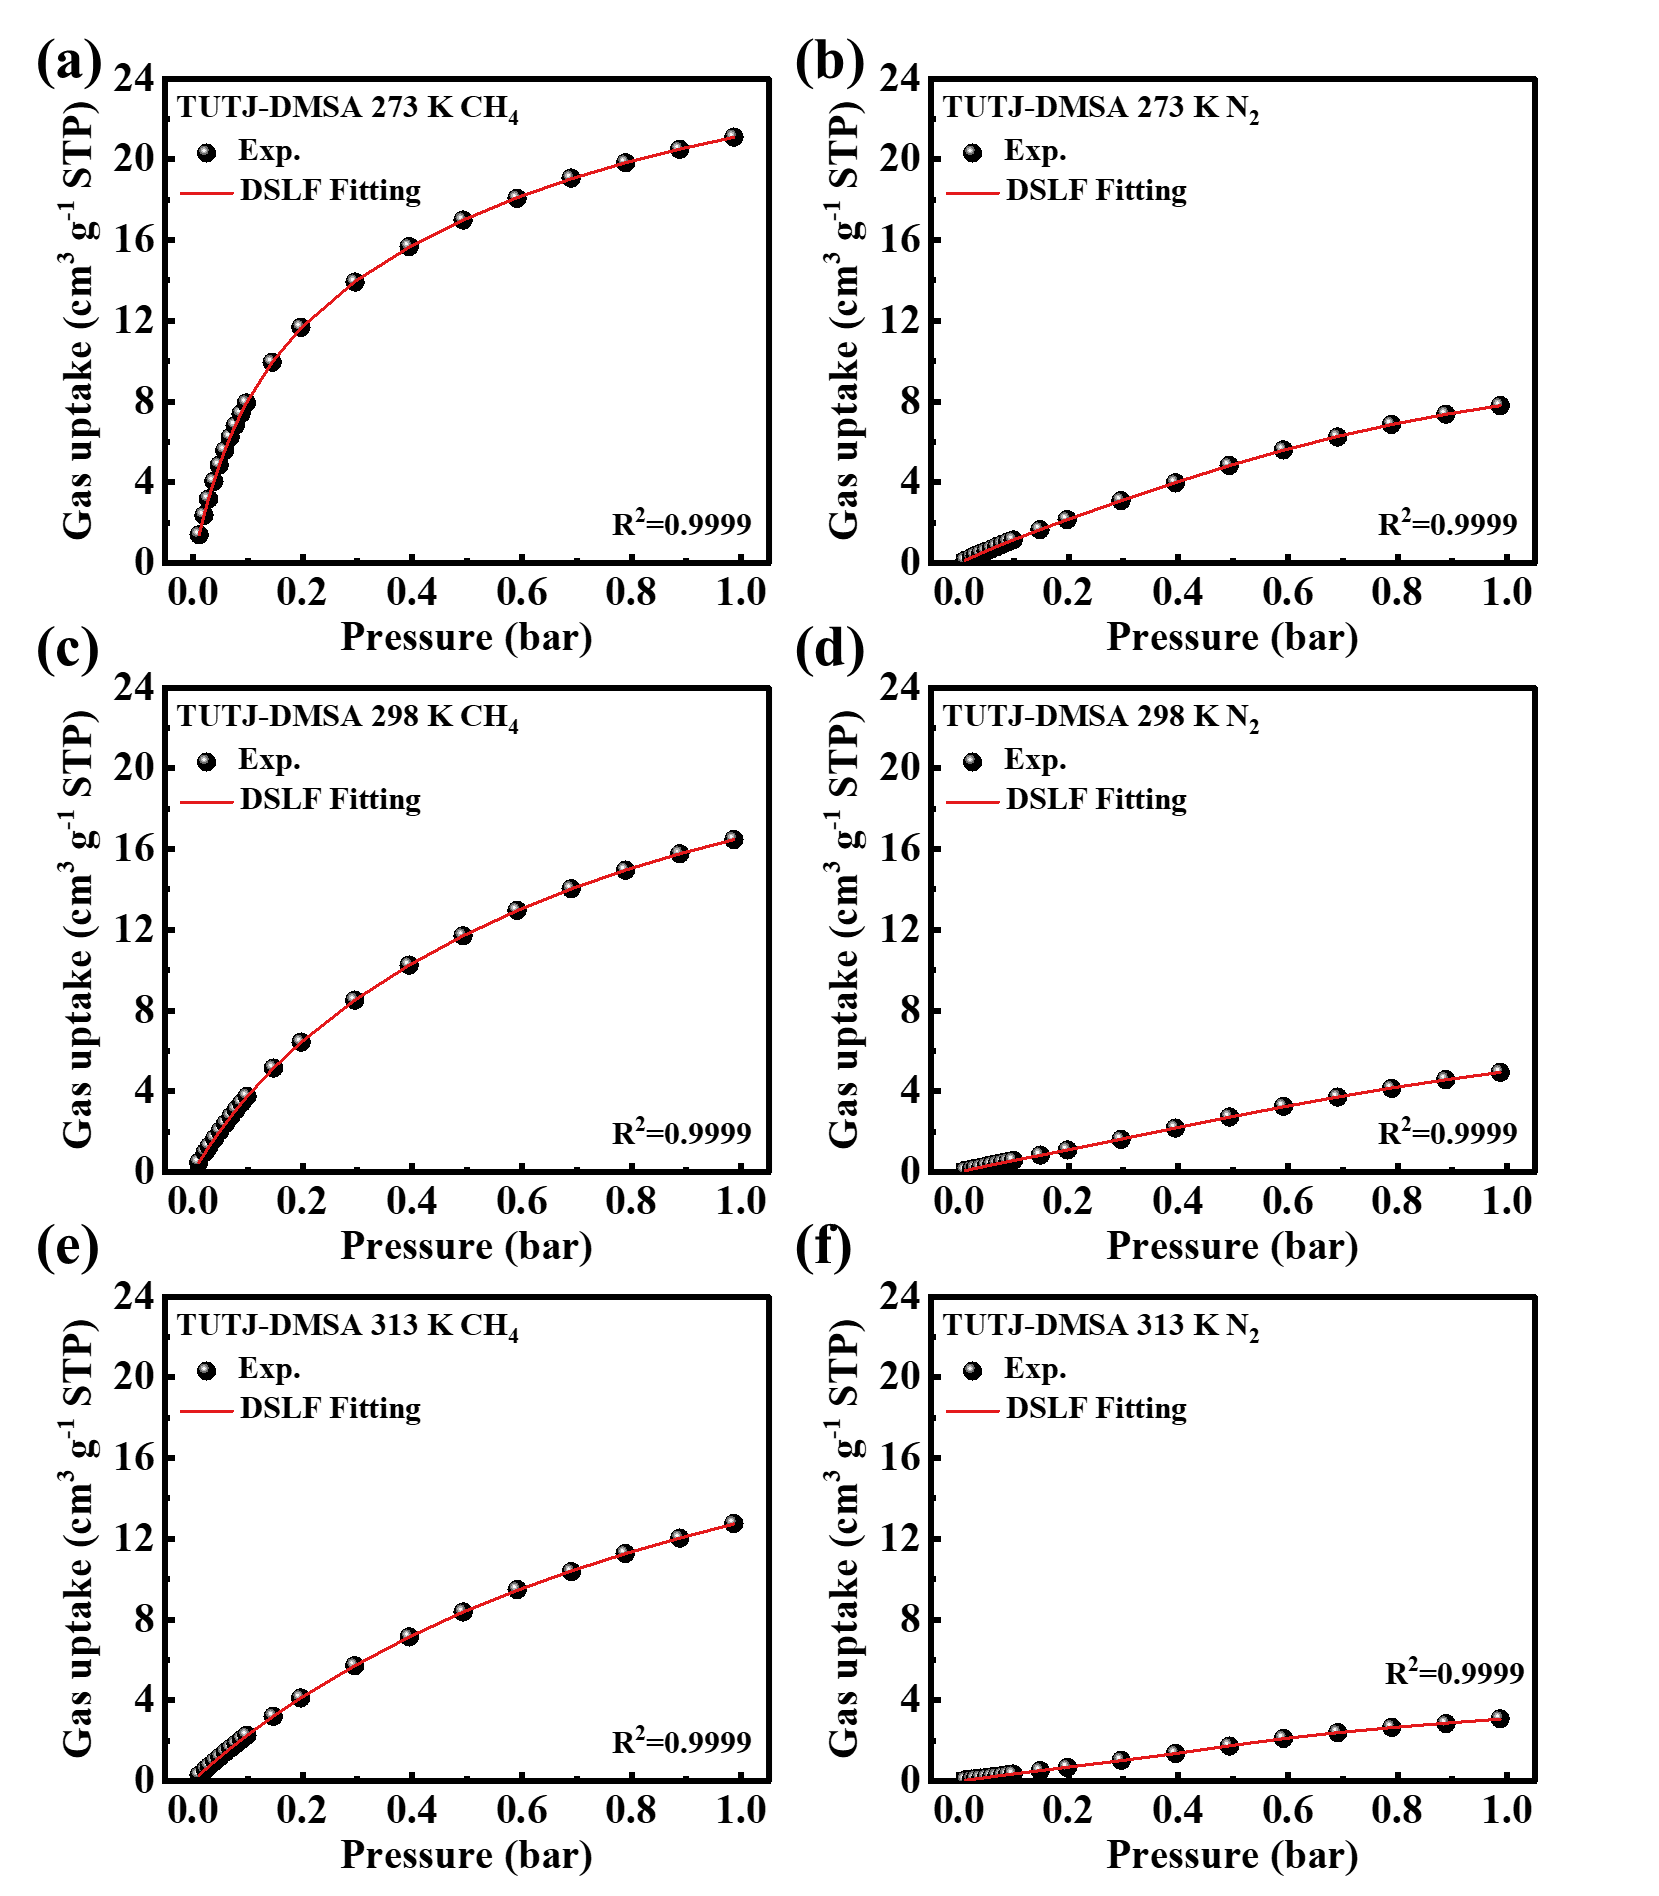


**Supplementary** Figure 33. CH4 and N2 adsorption isotherms at 273 K(a,b), 298 K(c,d), and 313 K(e,f) in TUTJ-DMSA with dual-site Langmuir-Freundlich model fits.


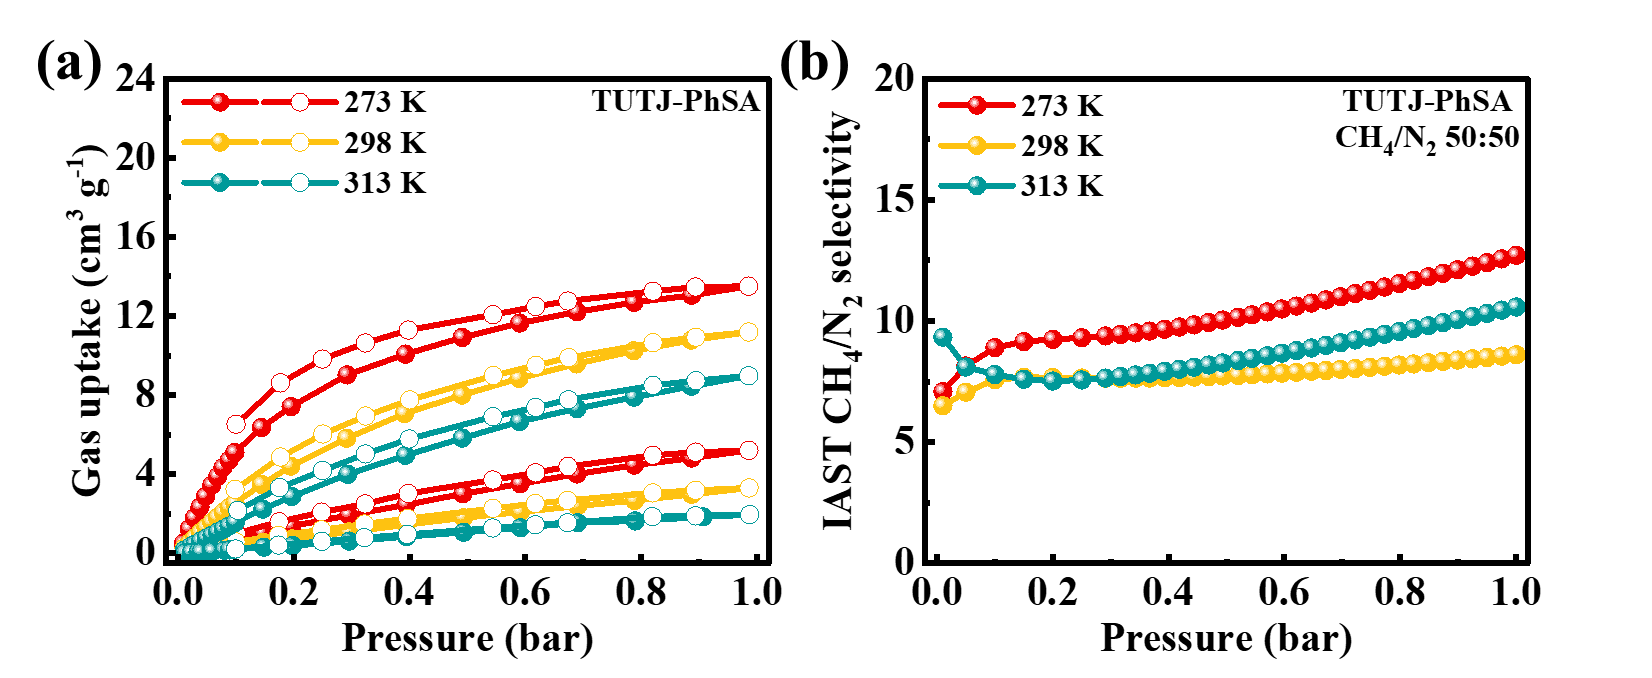


**Supplementary** Figure 34. (a) Single-component CH4 and N2 adsorption isotherms of TUTJ-PhSA at 273 K, 298 K, and 313 K, and (b) corresponding IAST-calculated CH4/N2 selectivity for an equimolar 50:50 mixture.


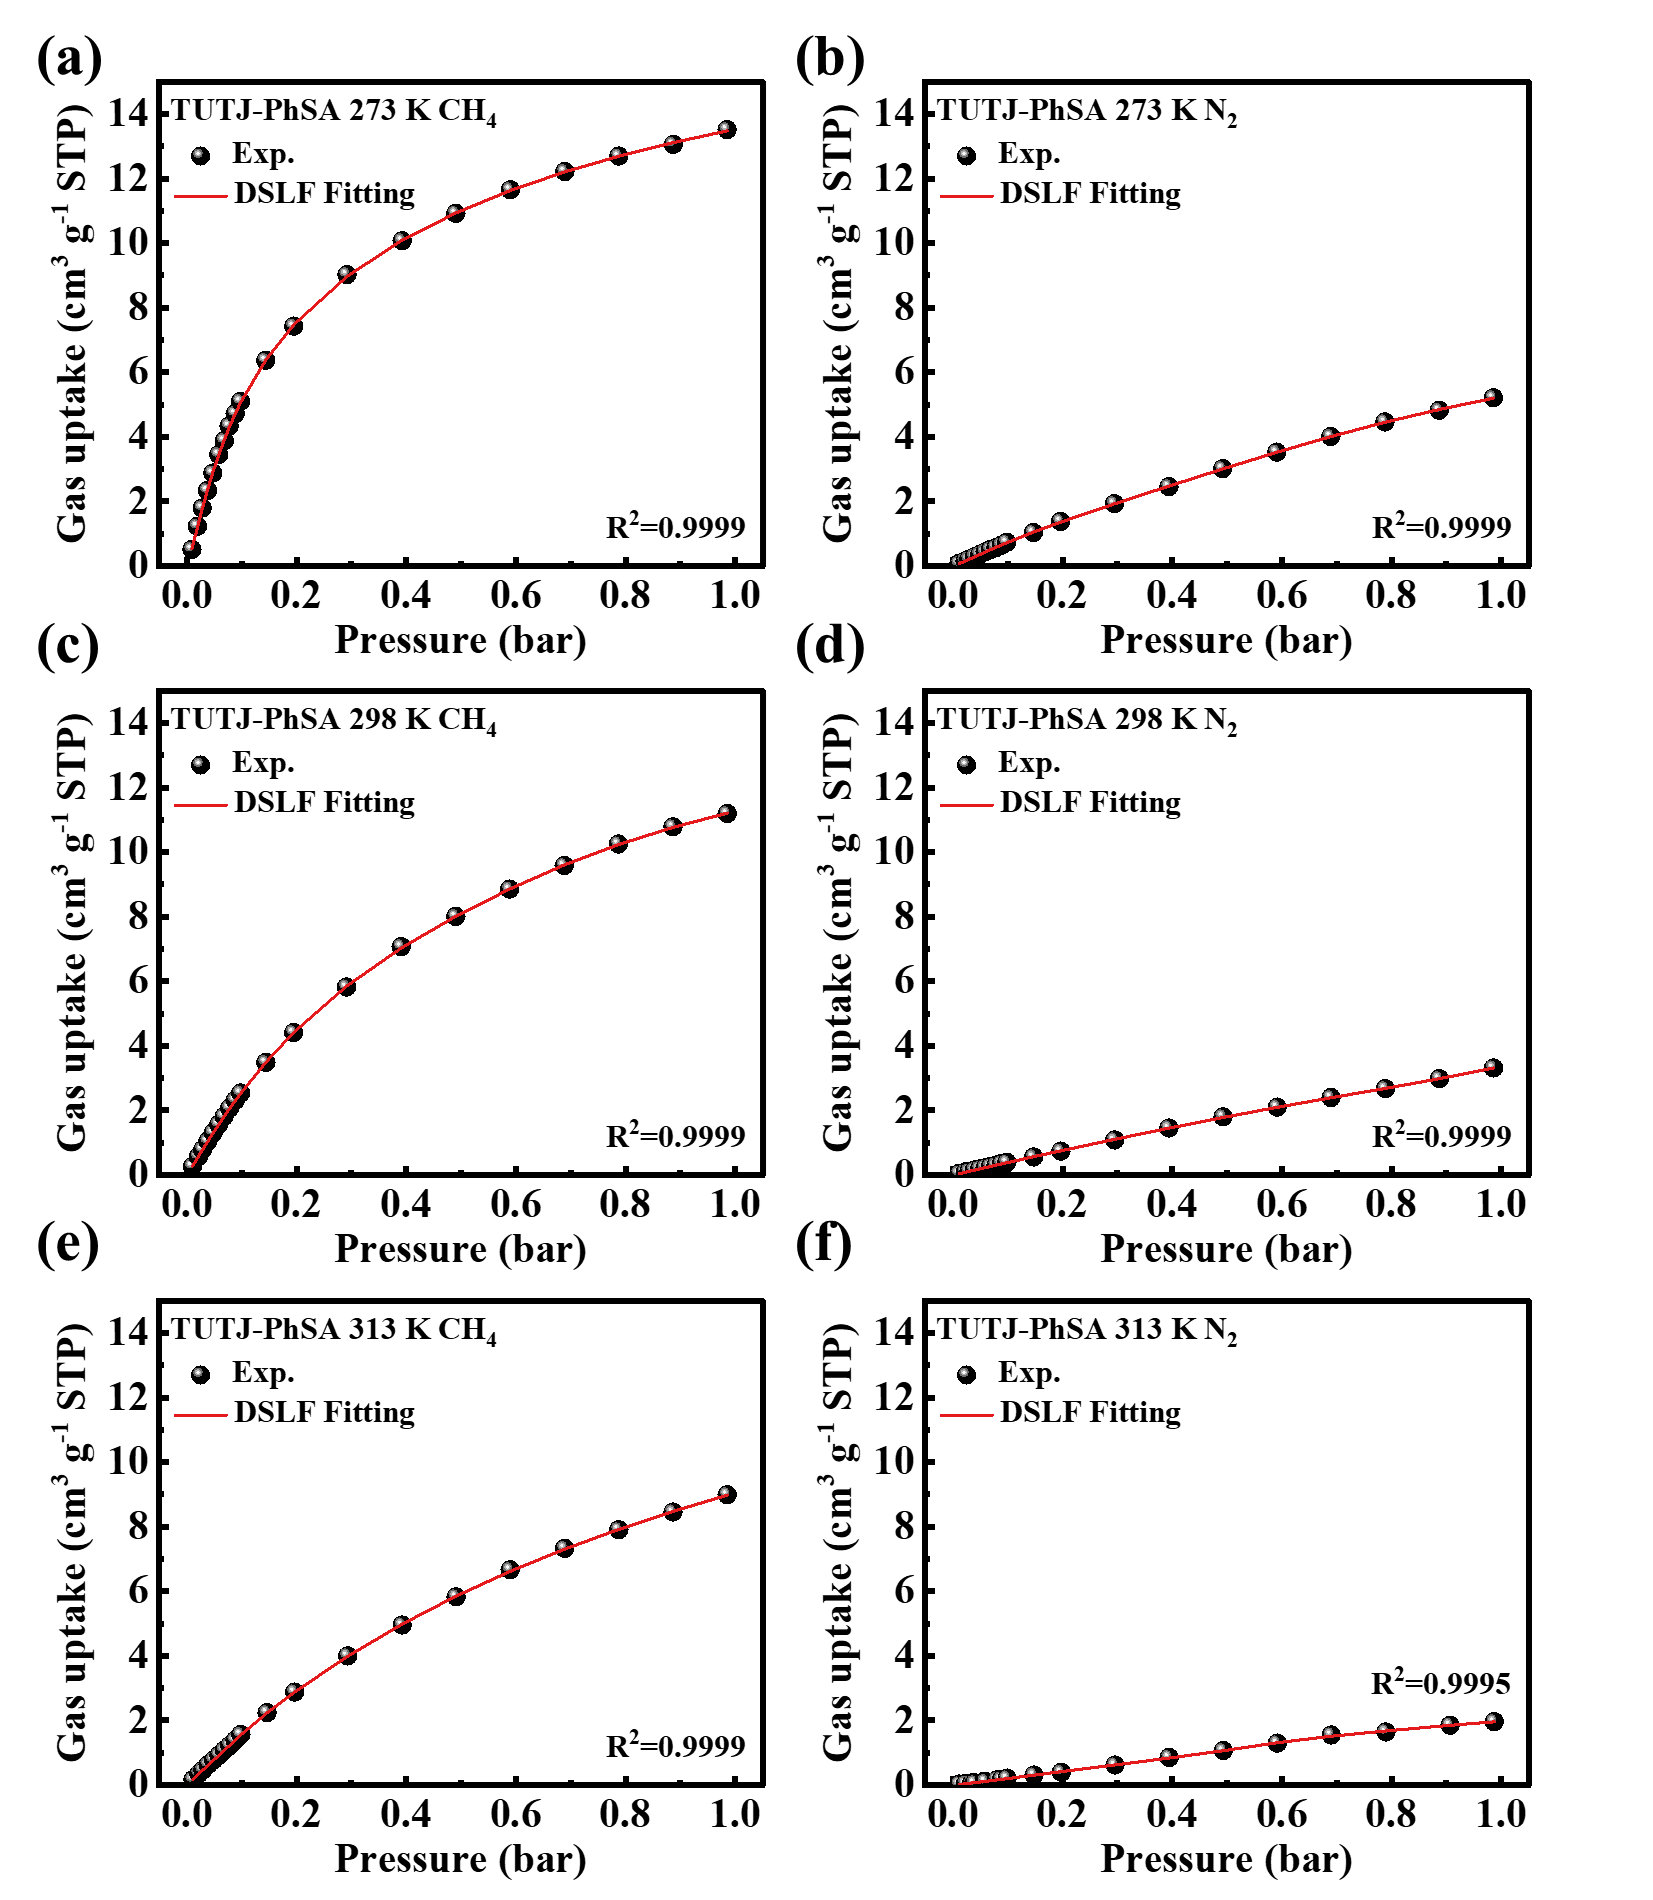


**Supplementary** Figure 35. CH4 and N2 adsorption isotherms at 273 K(a,b), 298 K(c,d), and 313 K(e,f) in TUTJ-PhSA with dual-site Langmuir-Freundlich model fits.


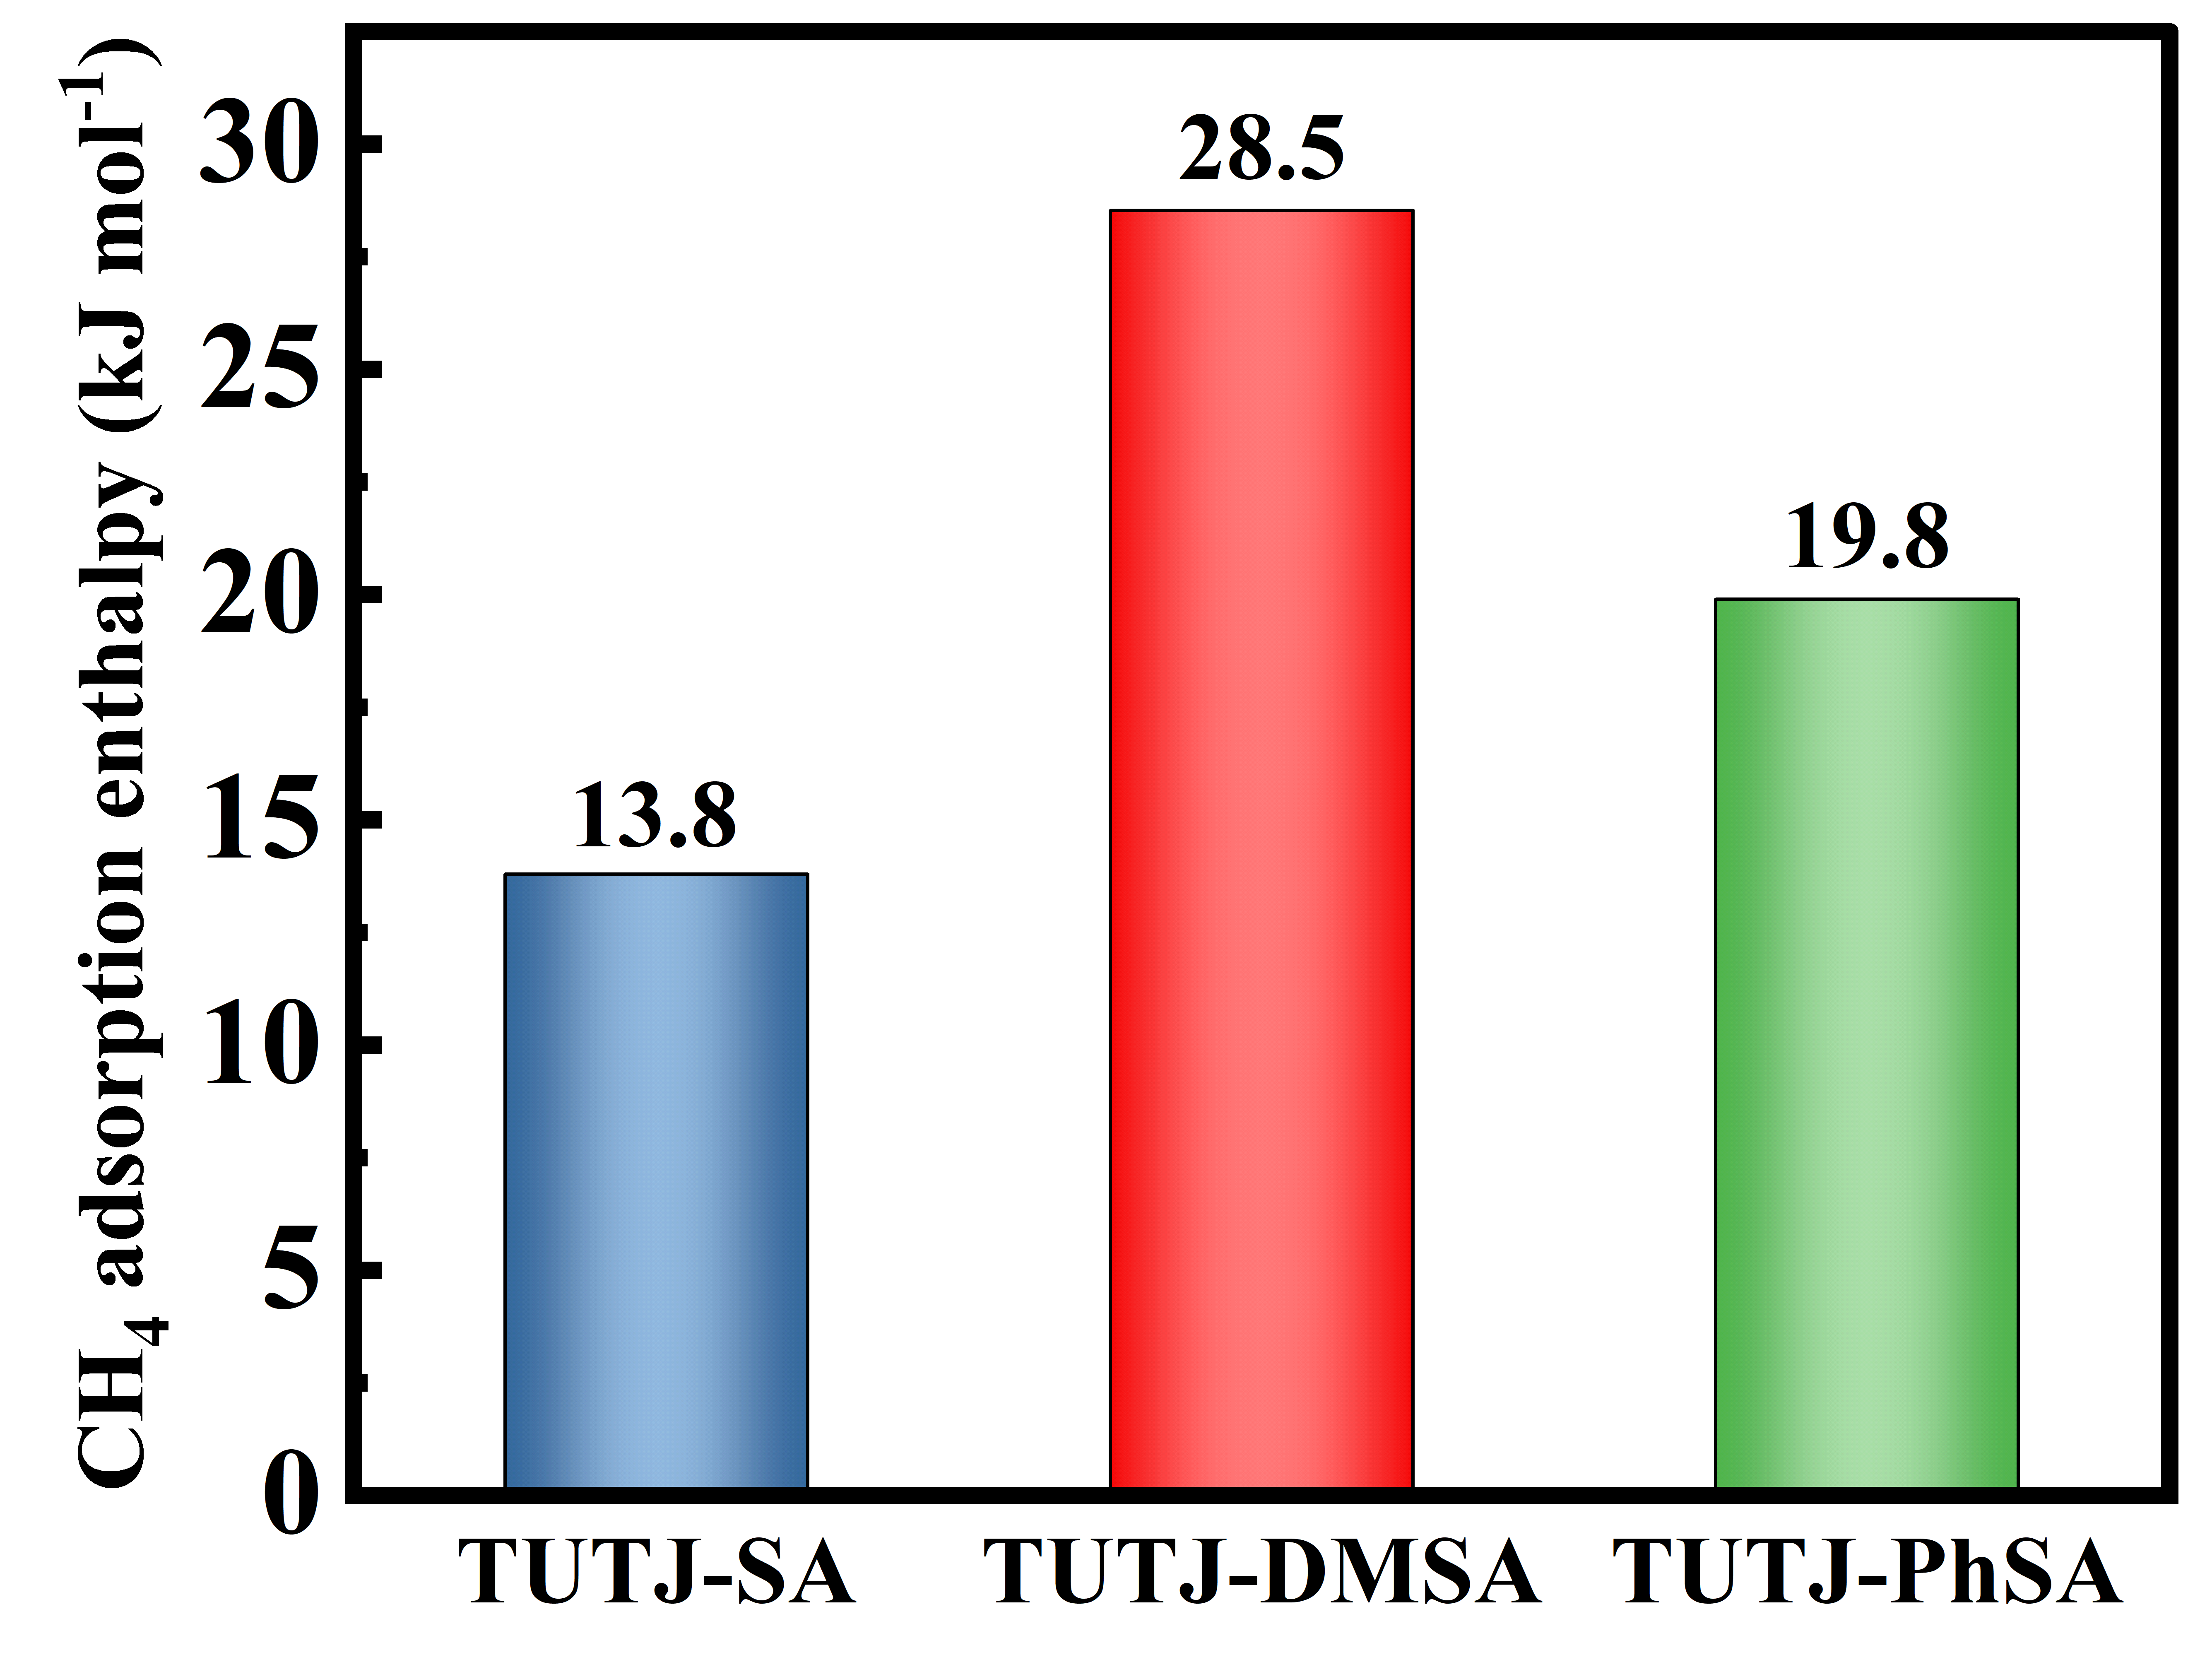


**Supplementary** Figure 36. The *Q*st values of methane for TUTJ-SA, TUTJ-DMSA, TUTJ-PhSA.


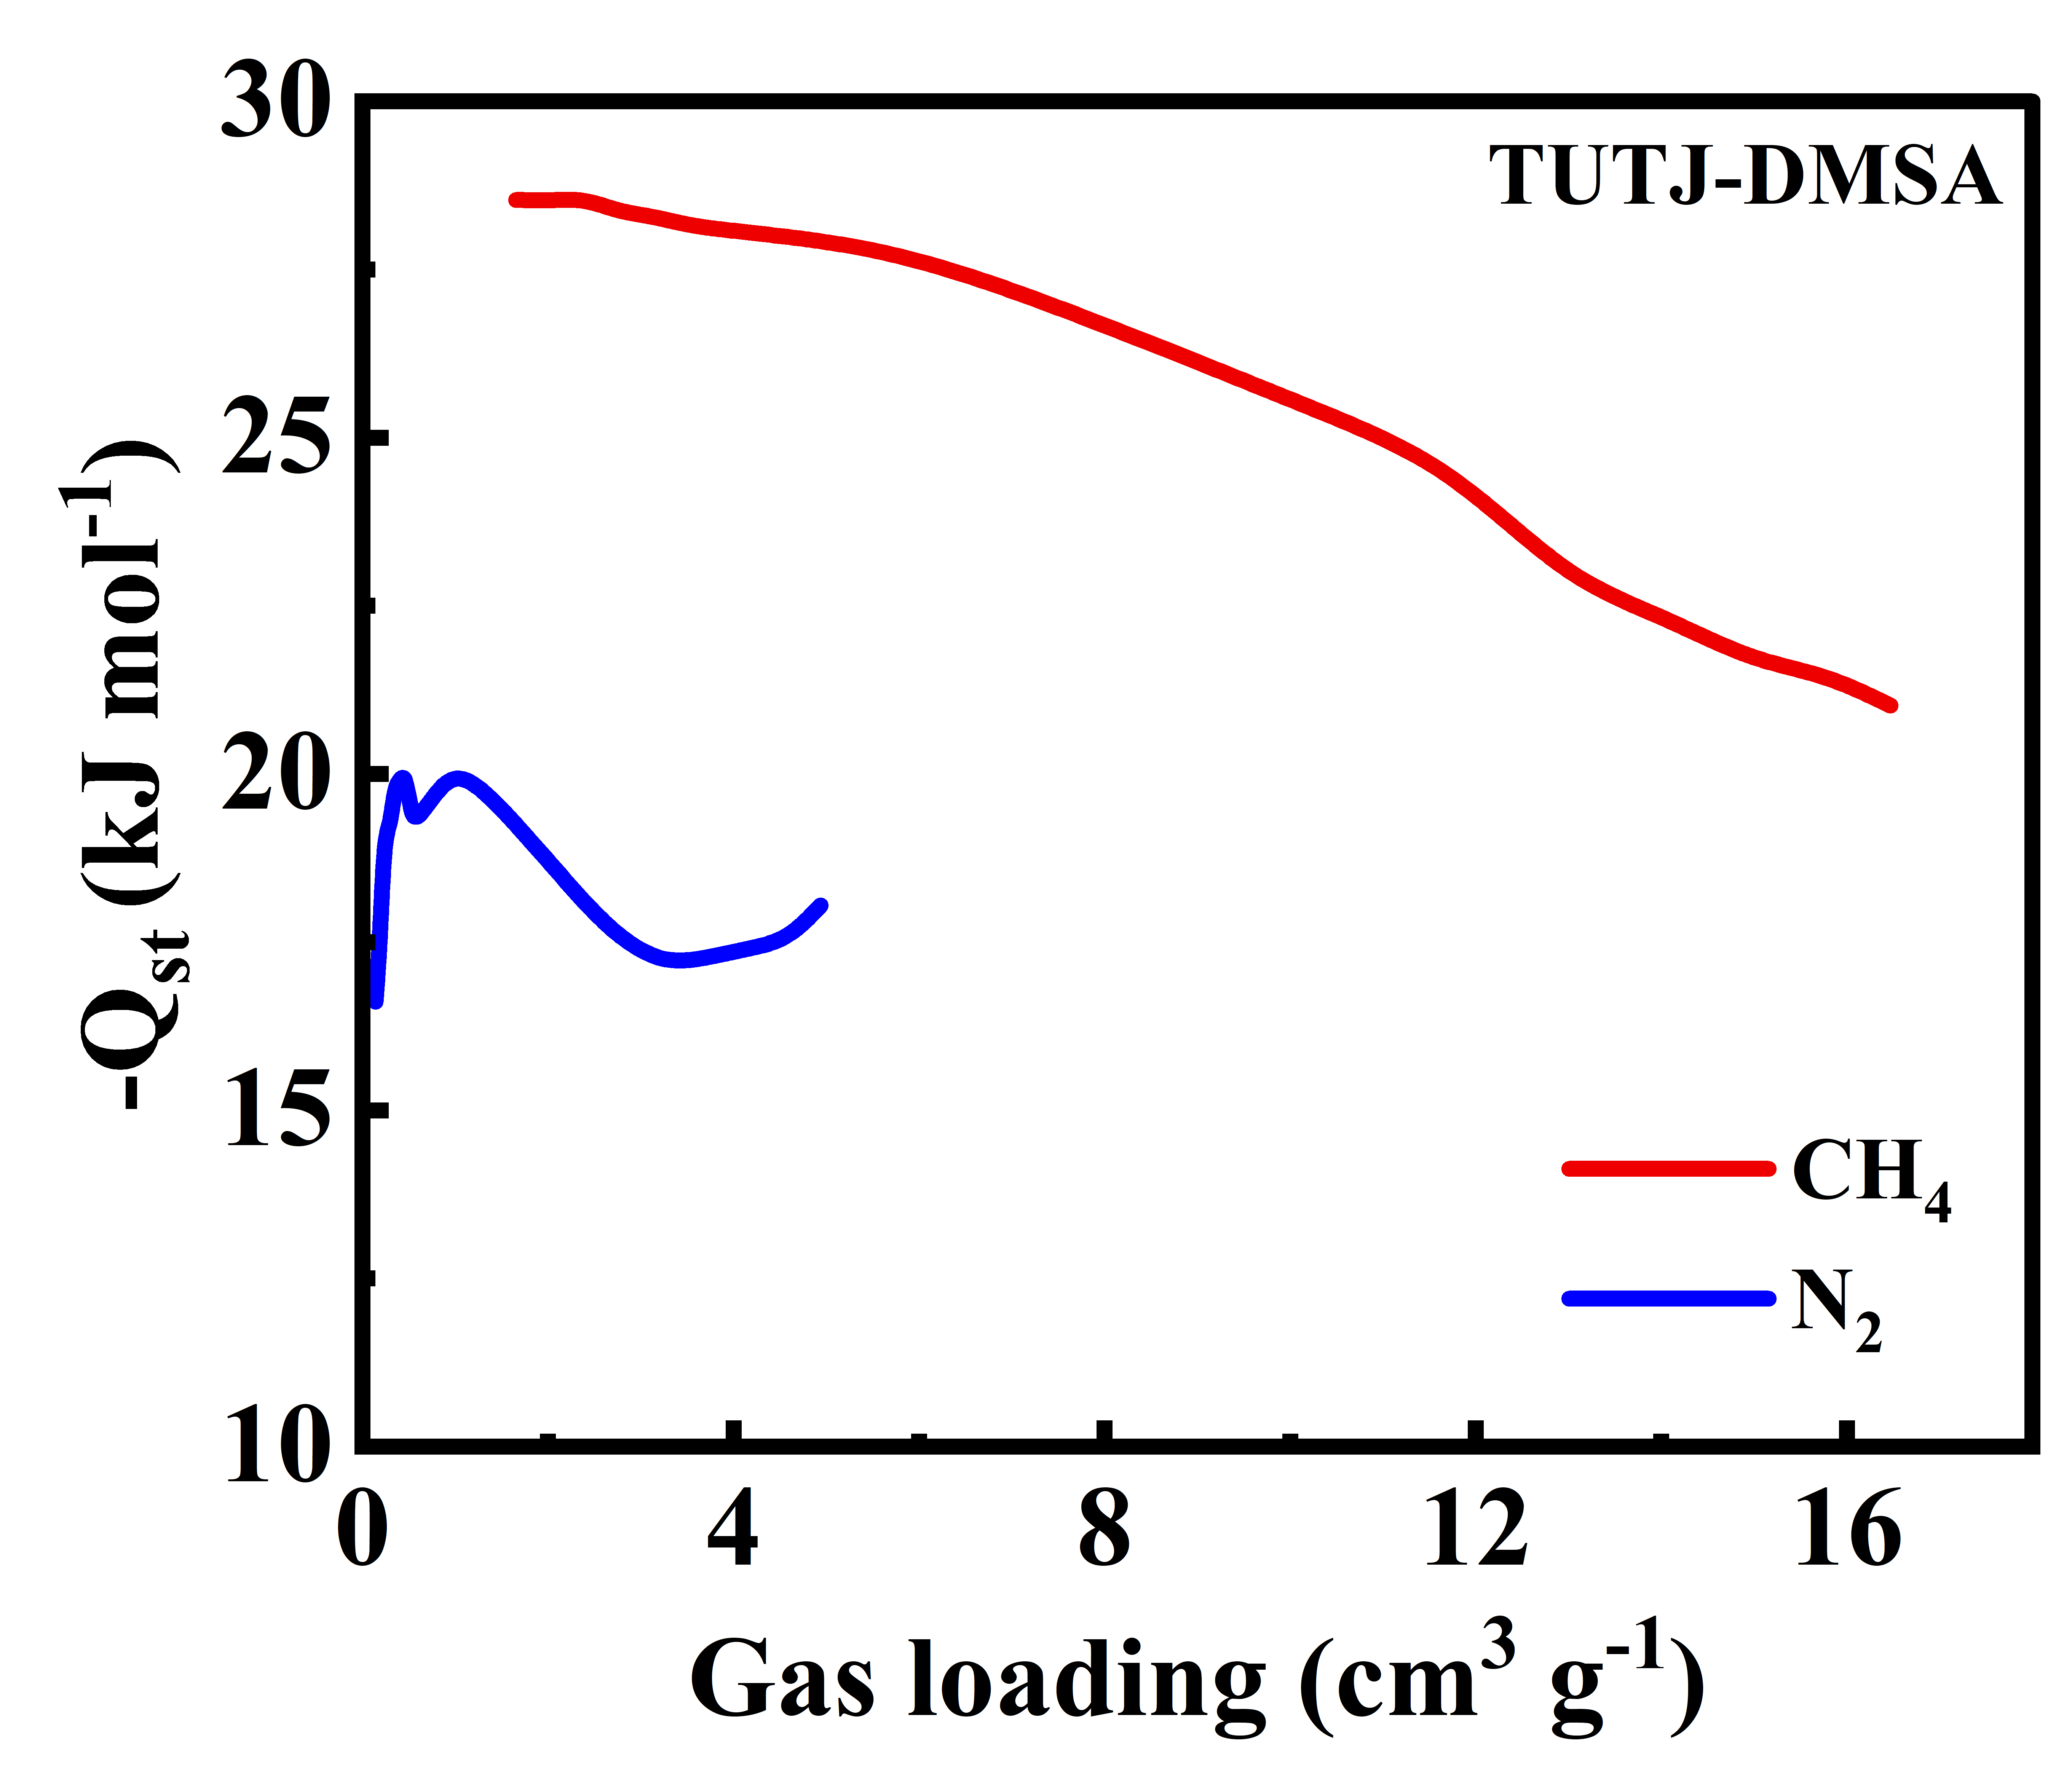


**Supplementary** Figure 37. The *Q*st values of CH4 and N2 for TUTJ-DMSA.


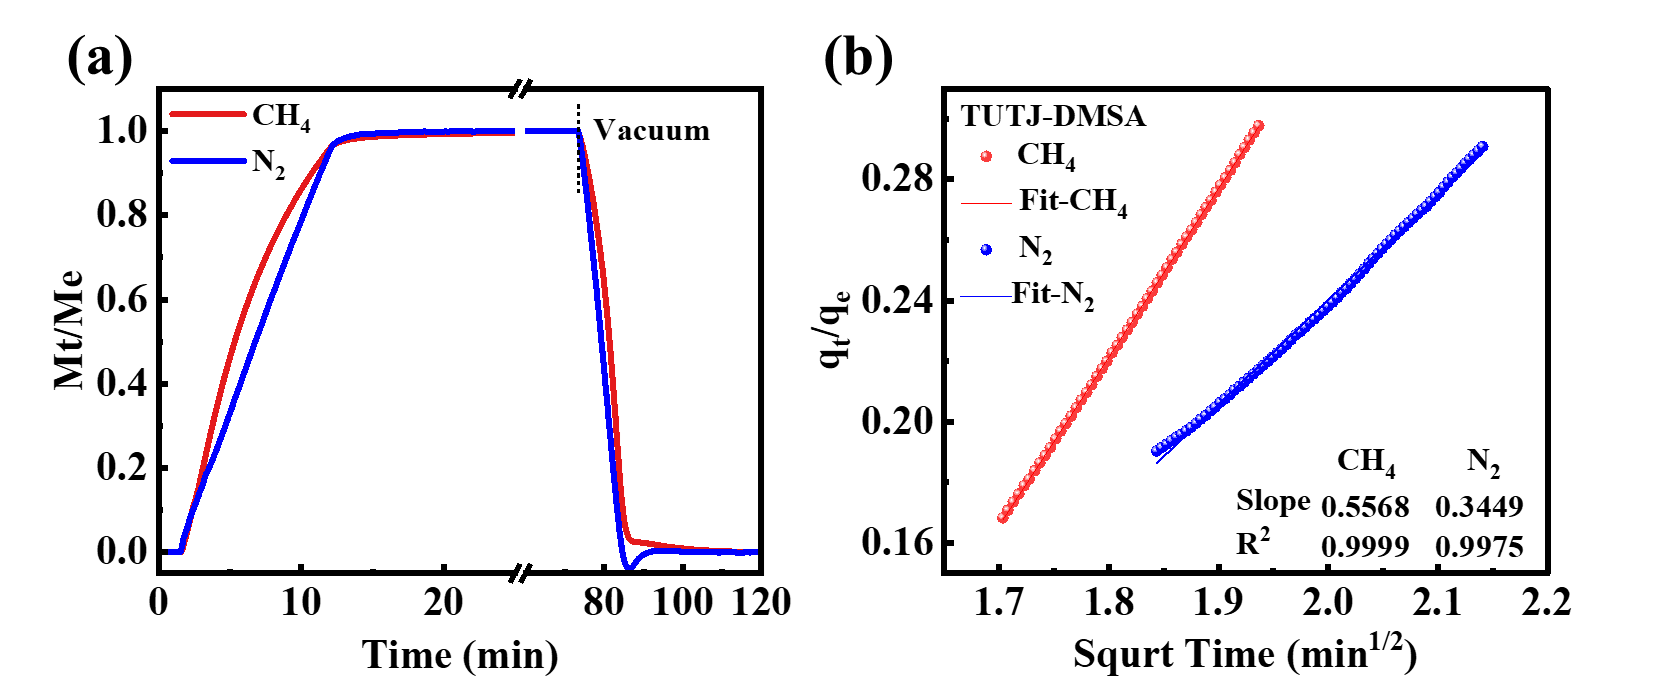


**Supplementary** Figure 38. (a) Kinetic adsorption/desorption profiles of CH4 and N2 for TUTJ-DMSA; (b) Diffusional time constant calculation details for TUTJ-DMSA at 298 K.


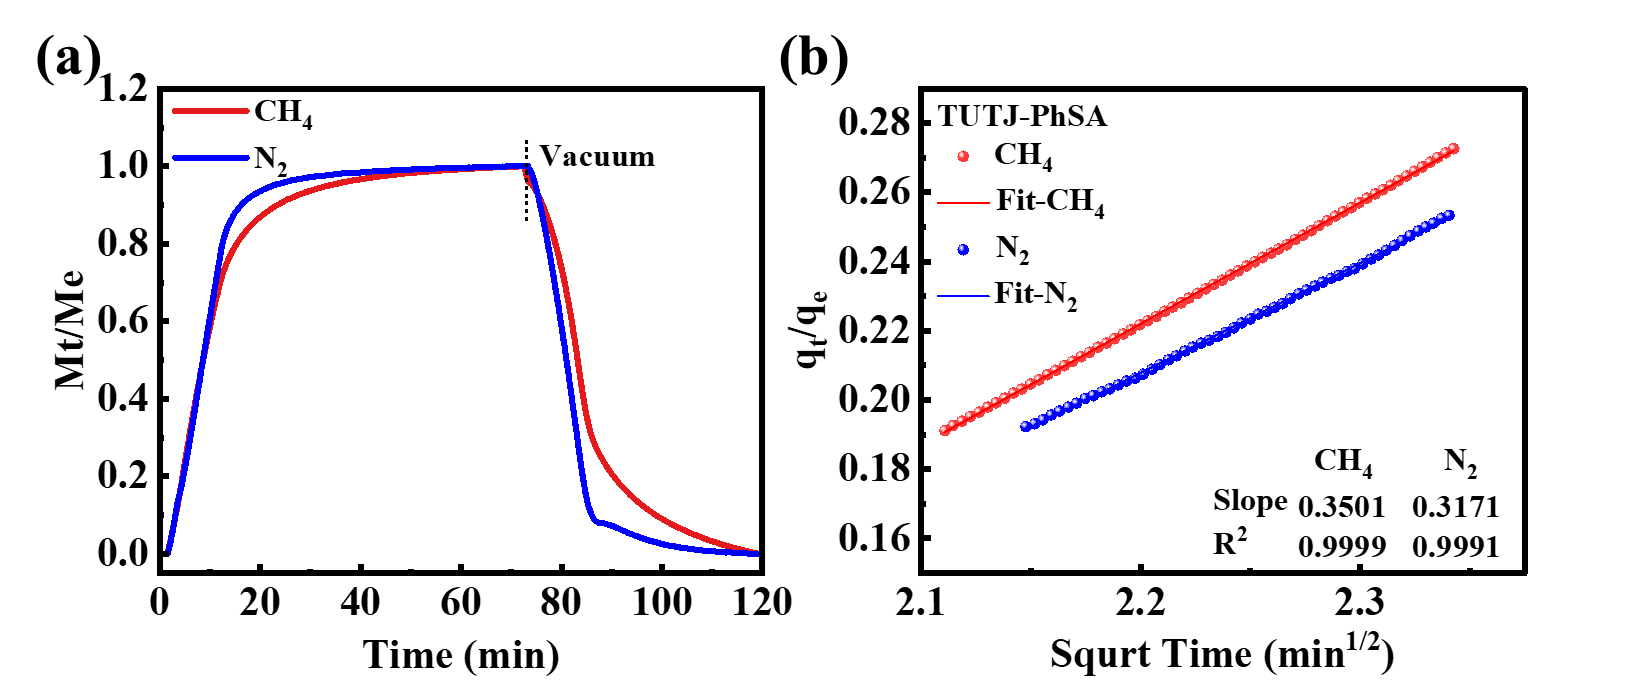


**Supplementary** Figure 39. (a) Kinetic adsorption/desorption profiles of CH4 and N2 for TUTJ-PhSA; (b) Diffusional time constant calculation details for TUTJ-PhSA at 298 K.


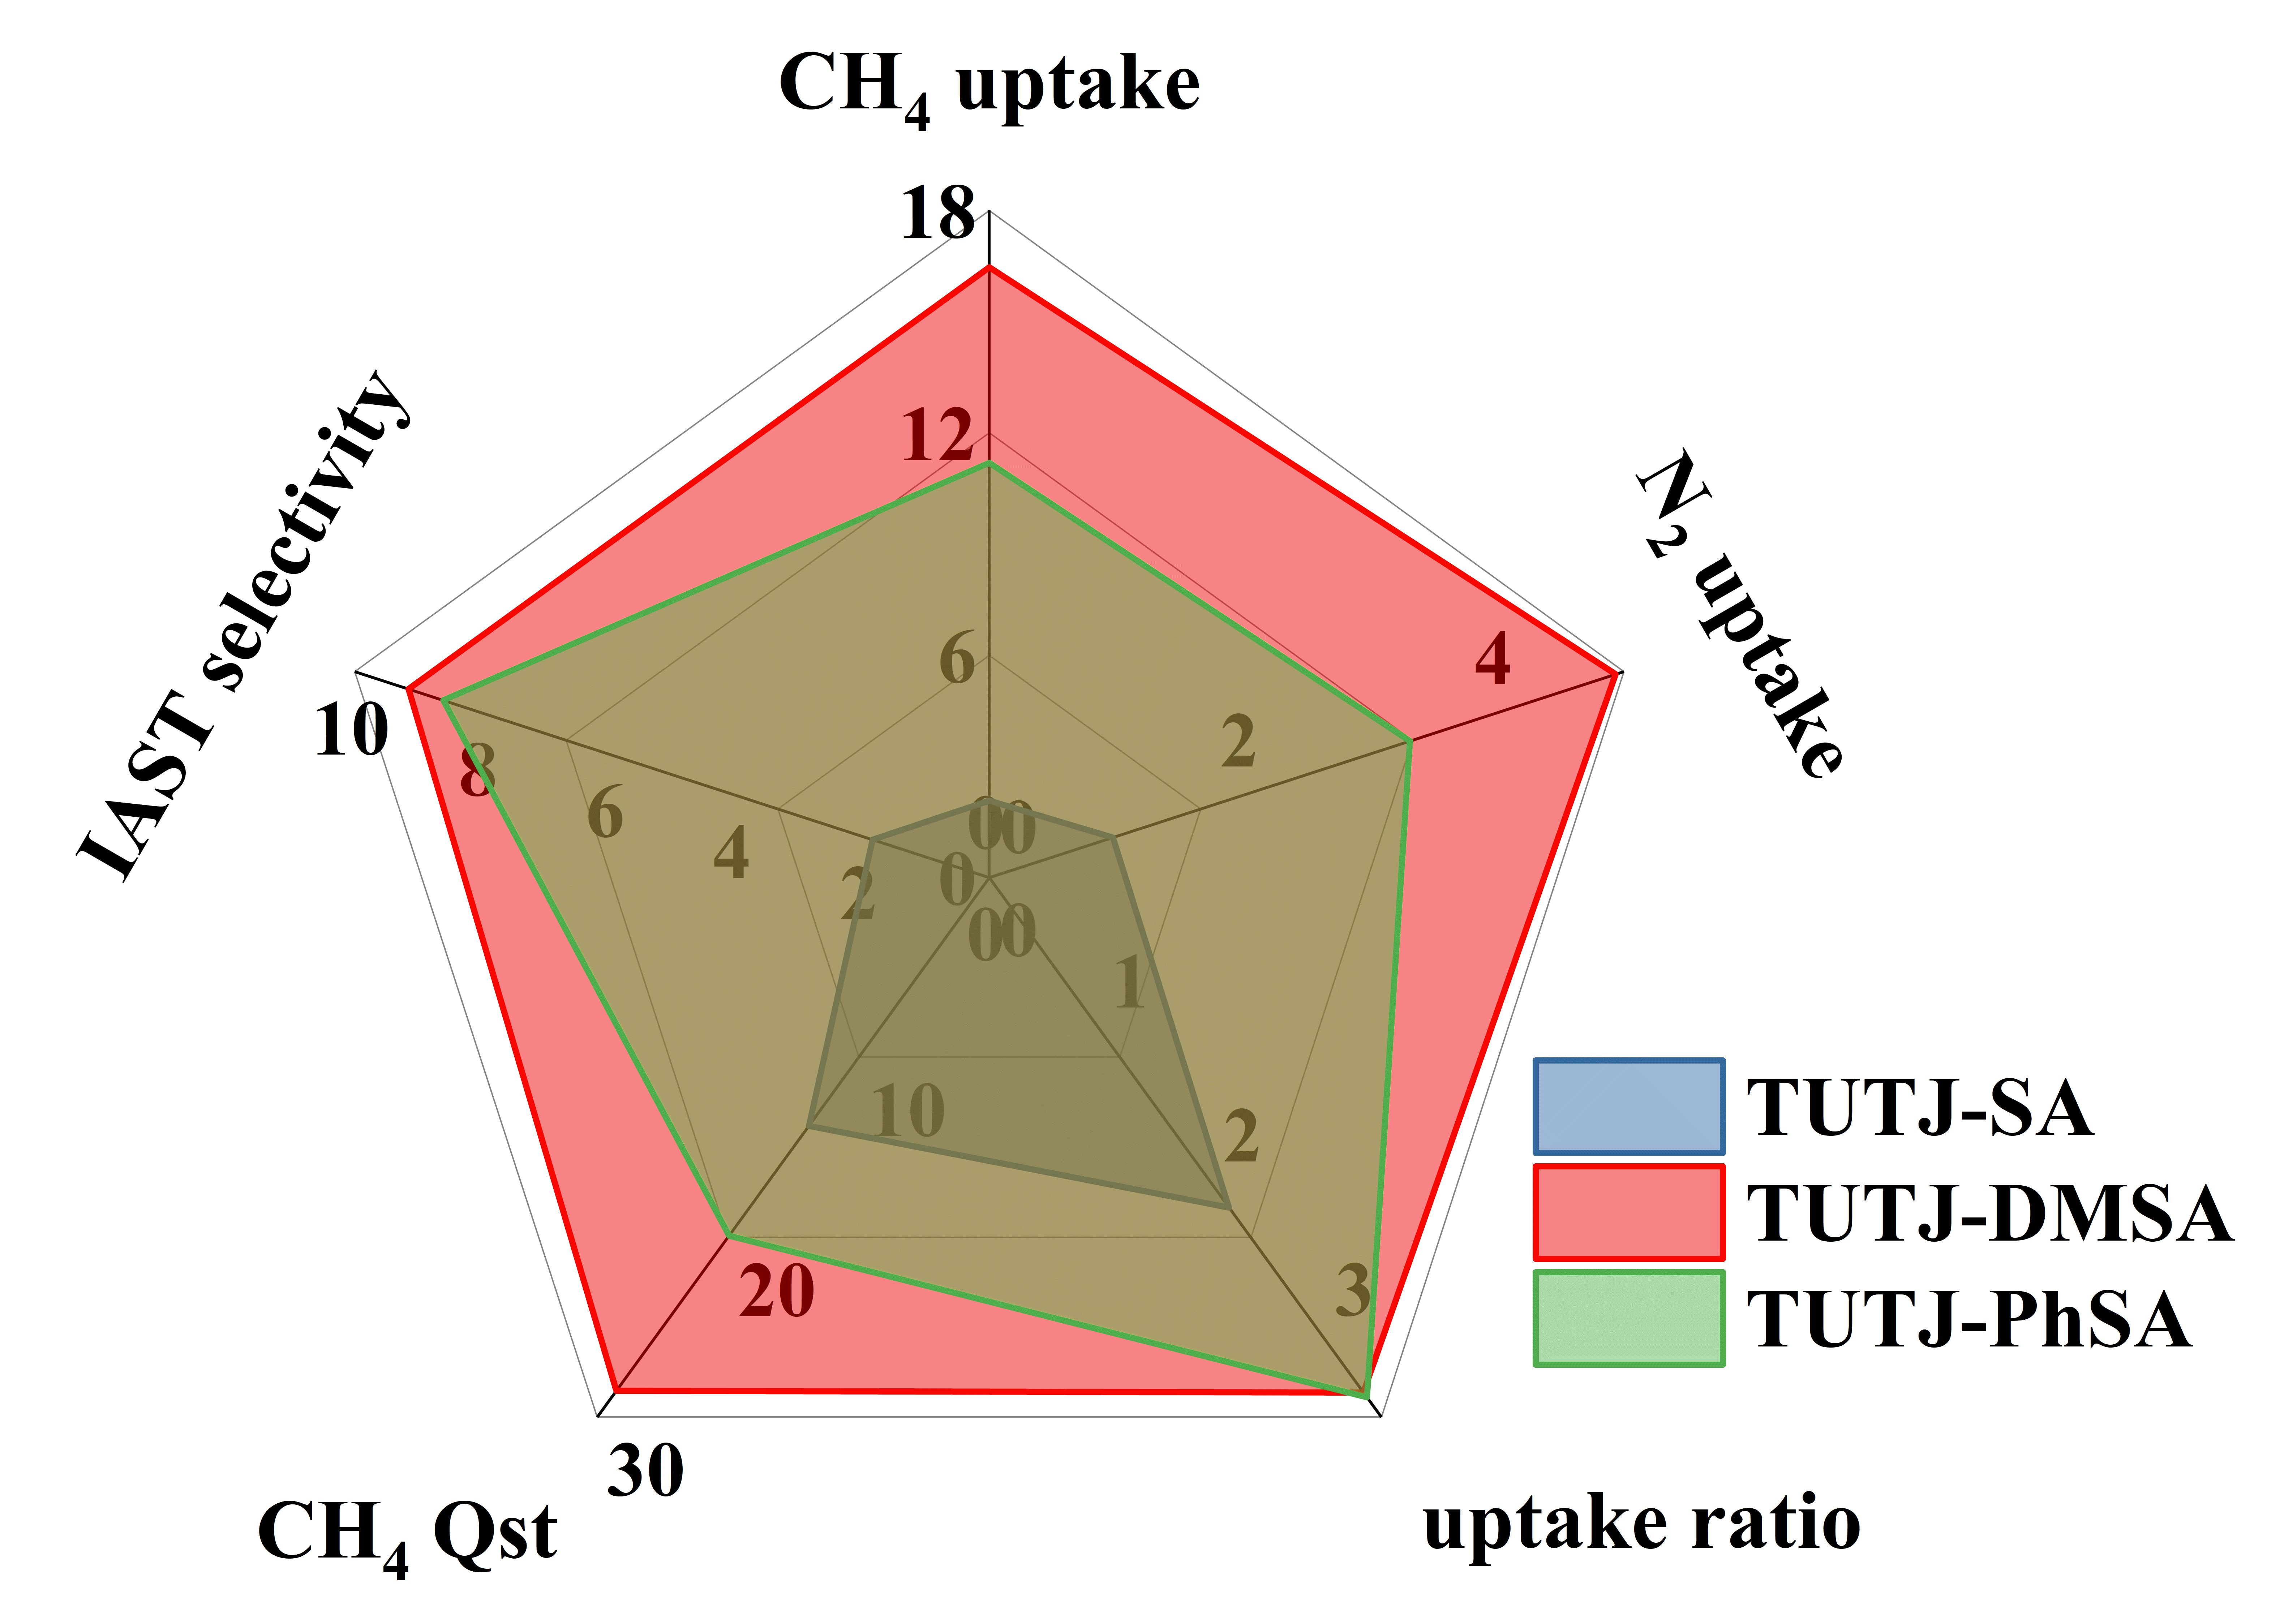


**Supplementary** Figure 40. Comprehensive performance radar chart comparing CH4/N2 separation metrics of TUTJ-SA (blue), TUTJ-DMSA (red), and TUTJ-PhSA (green).


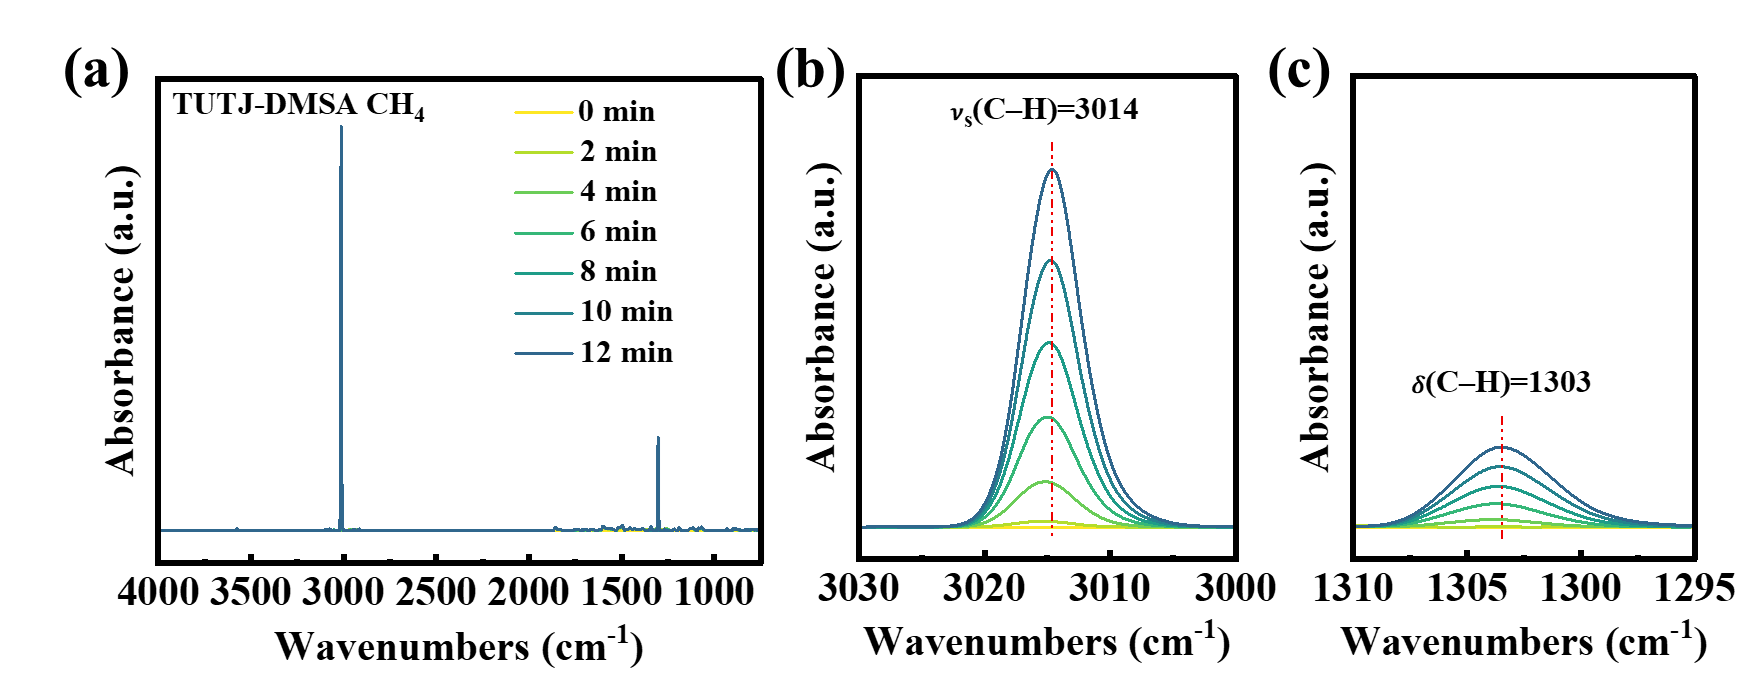


**Supplementary** Figure 41. (a) In-situ FTIR spectra collected during CH4 adsorption, with zoomed views of the symmetric C–H stretching (b) and bending (c) vibrational modes of adsorbed CH4.


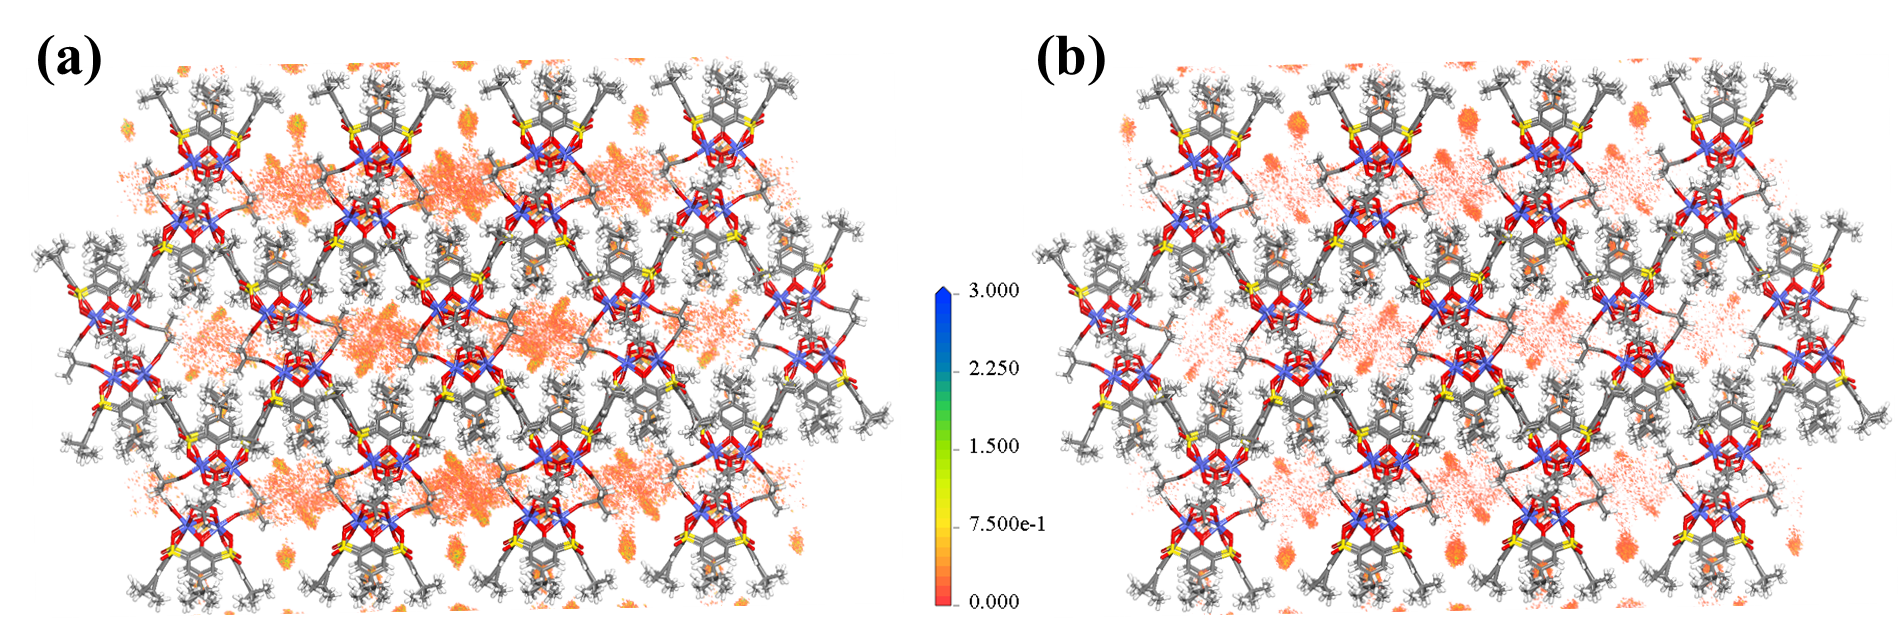


**Supplementary** Figure 42. GCMC-derived probability density distributions for adsorbed CH4 (a) and N2 (b) molecules in TUTJ-DMSA.


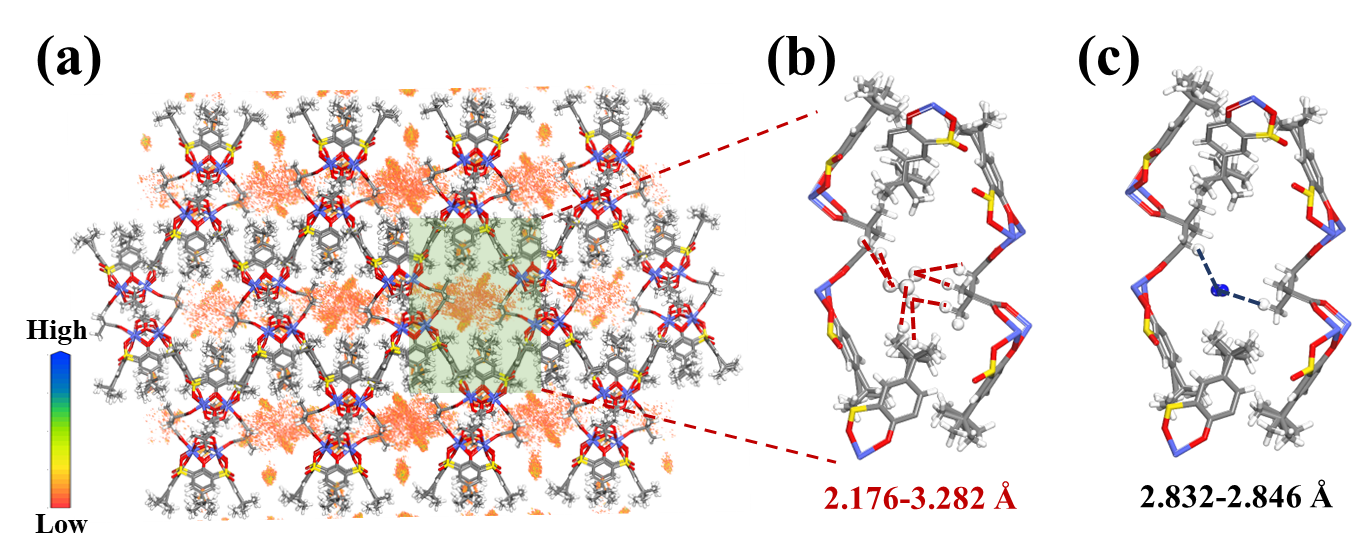


**Supplementary** Figure 43. (a) GCMC charge density distribution map; DFT-optimized binding configuration of CH4 (b) and N2 (c).


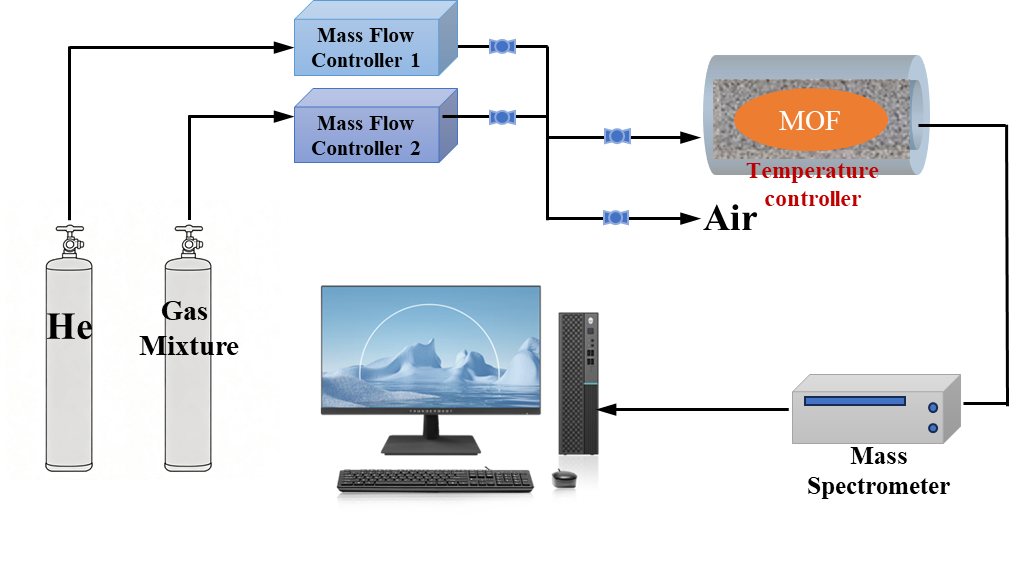


**Supplementary Figure 44.** Schematic illustration of the setup for breakthrough experiments.


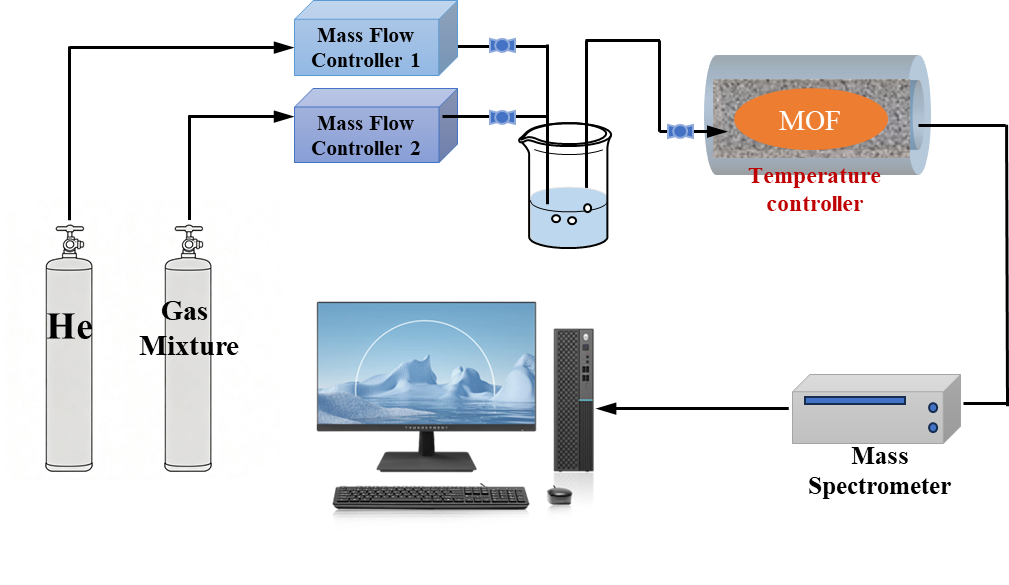


**Supplementary Figure 45.** Schematic illustration of the apparatus for the breakthrough experiments under humid conditions.


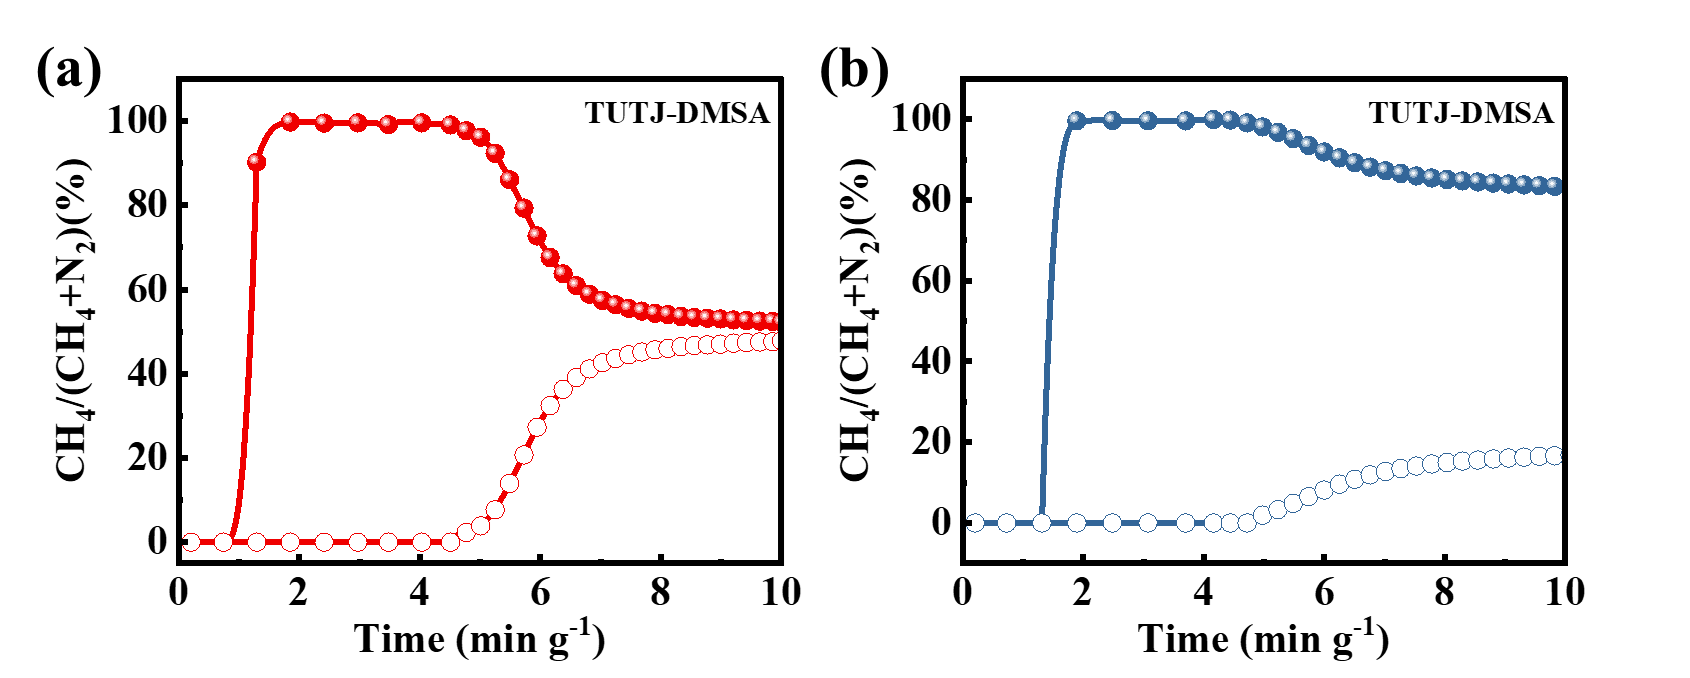


**Supplementary** Figure 46. Breakthrough curves of TUTJ-3Ni for 50:50 (a) and 20:80 (b) CH4/N2 mixtures.


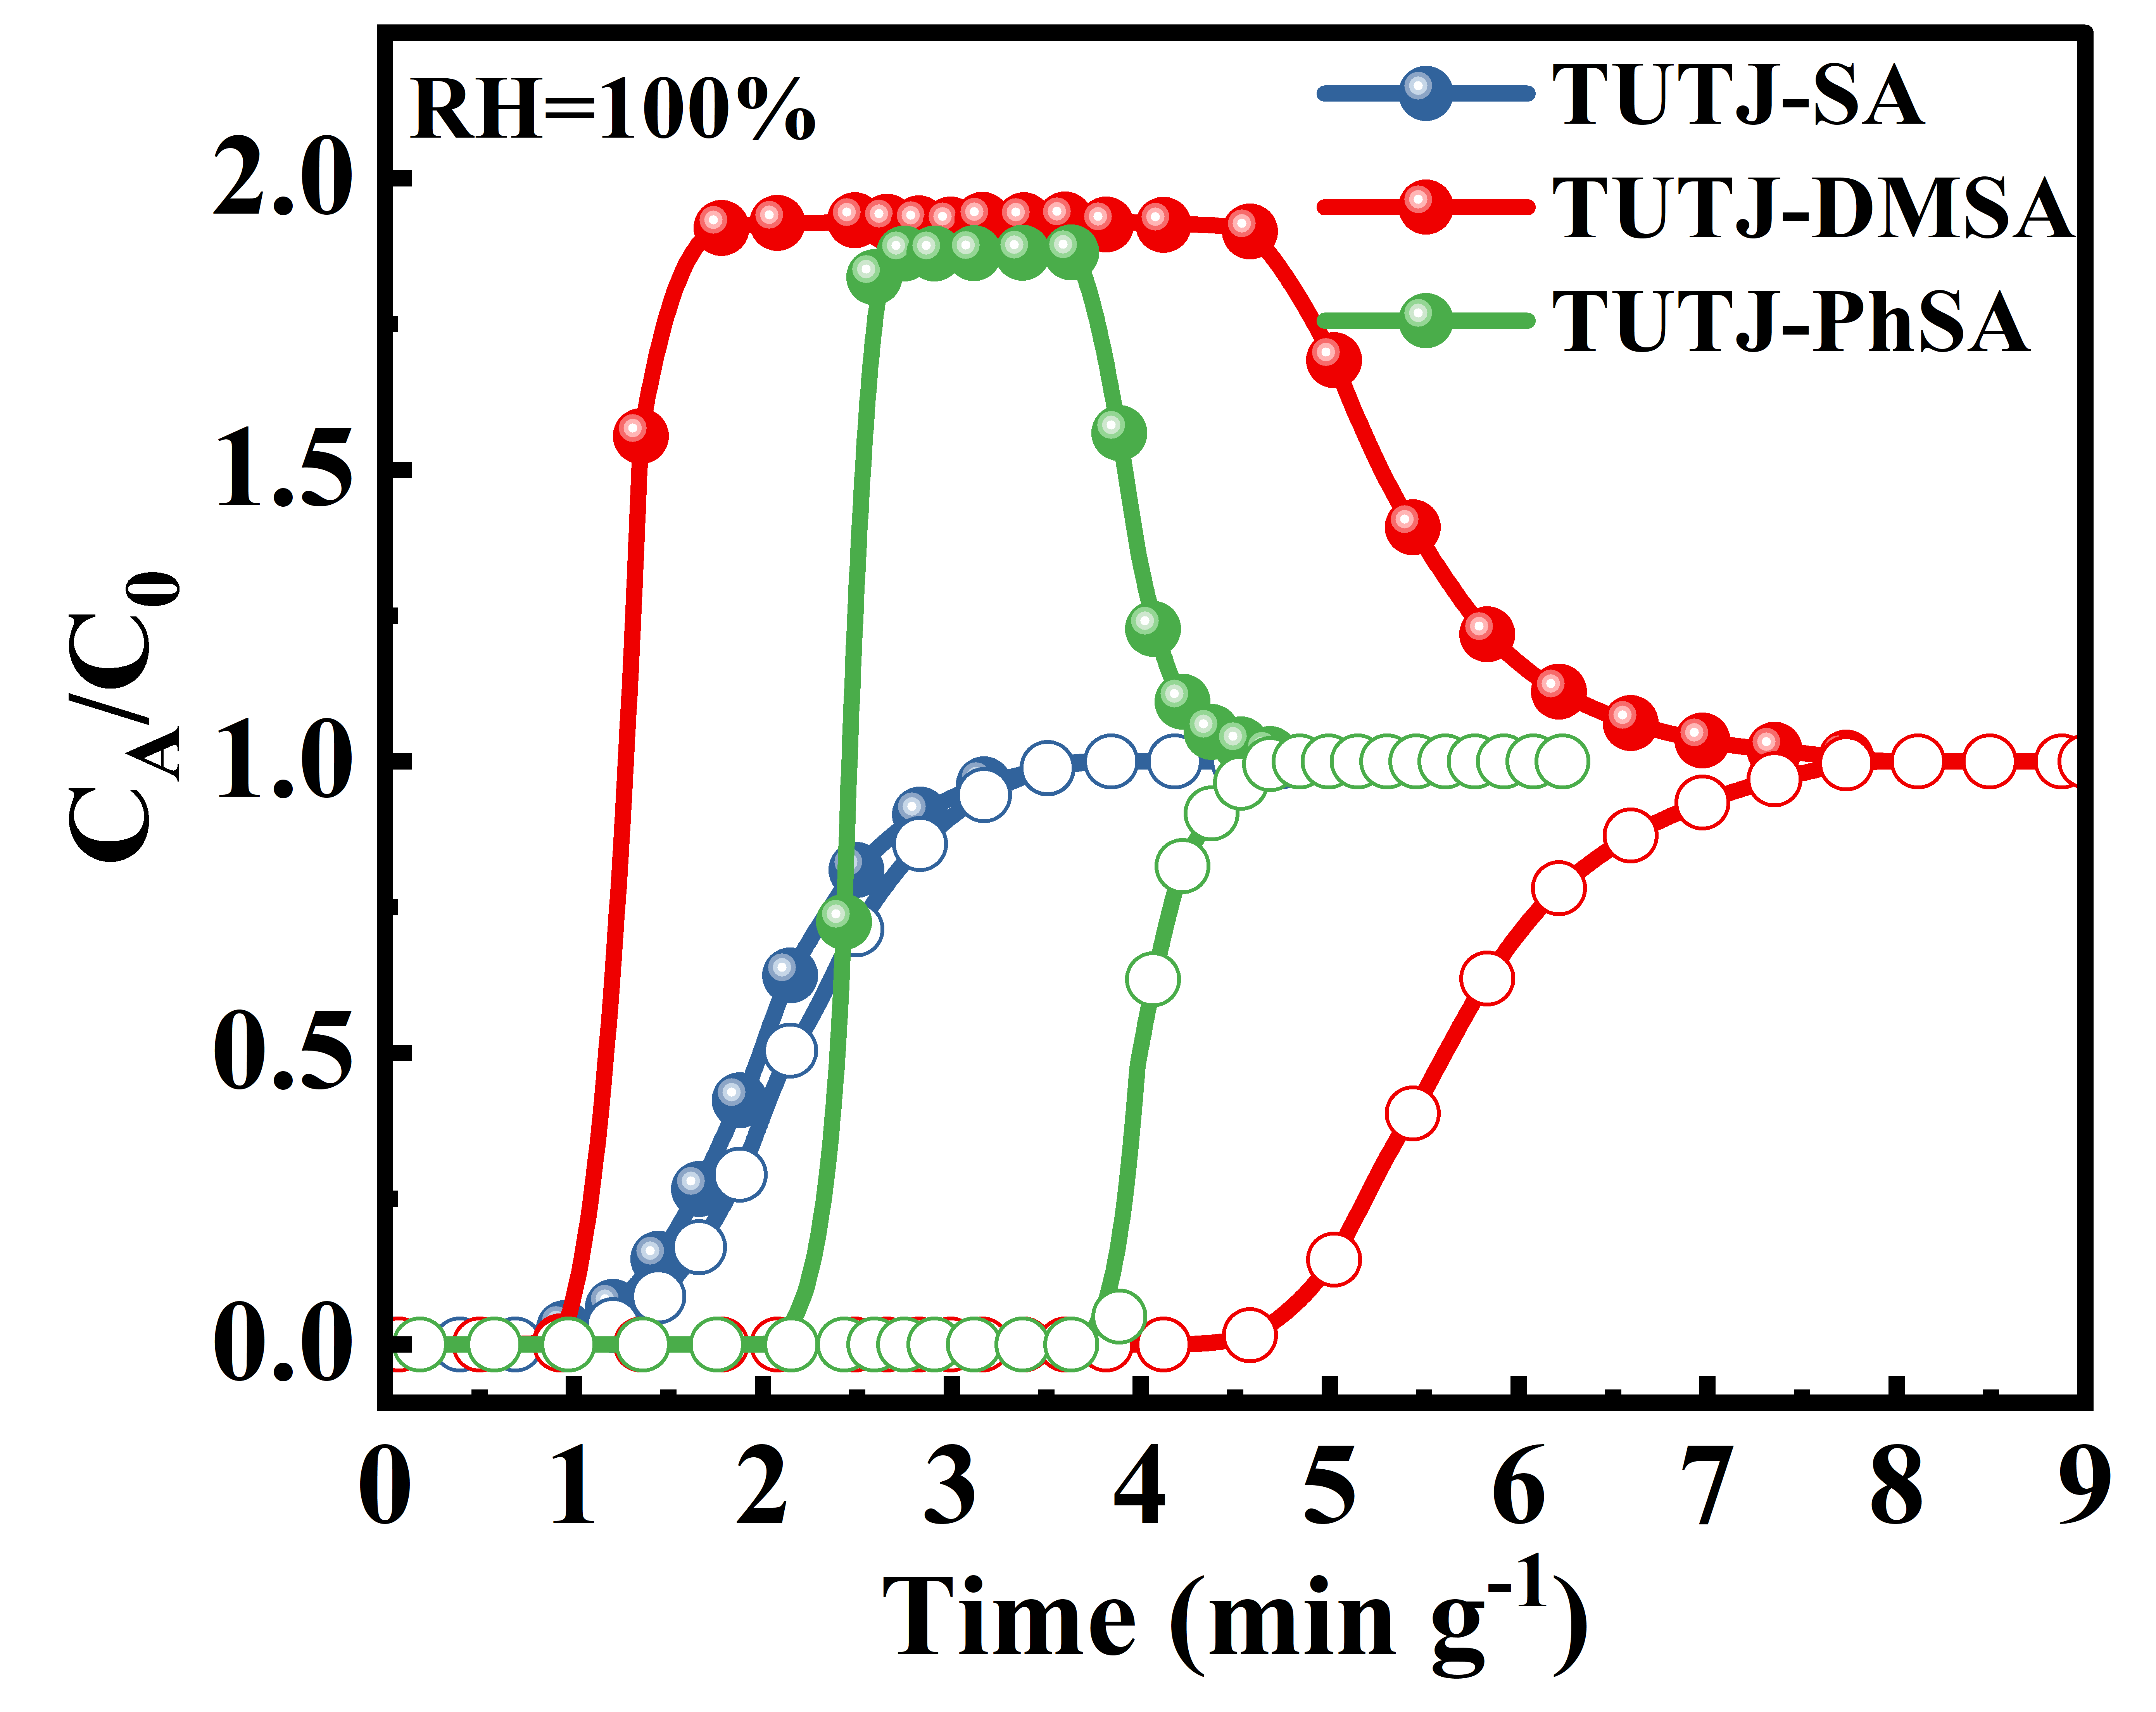


**Supplementary** Figure 47. Breakthrough curves of TUTJ-SA (blue), TUTJ-DMSA (red), and TUTJ-PhSA (green) at 100% RH and 298 K.


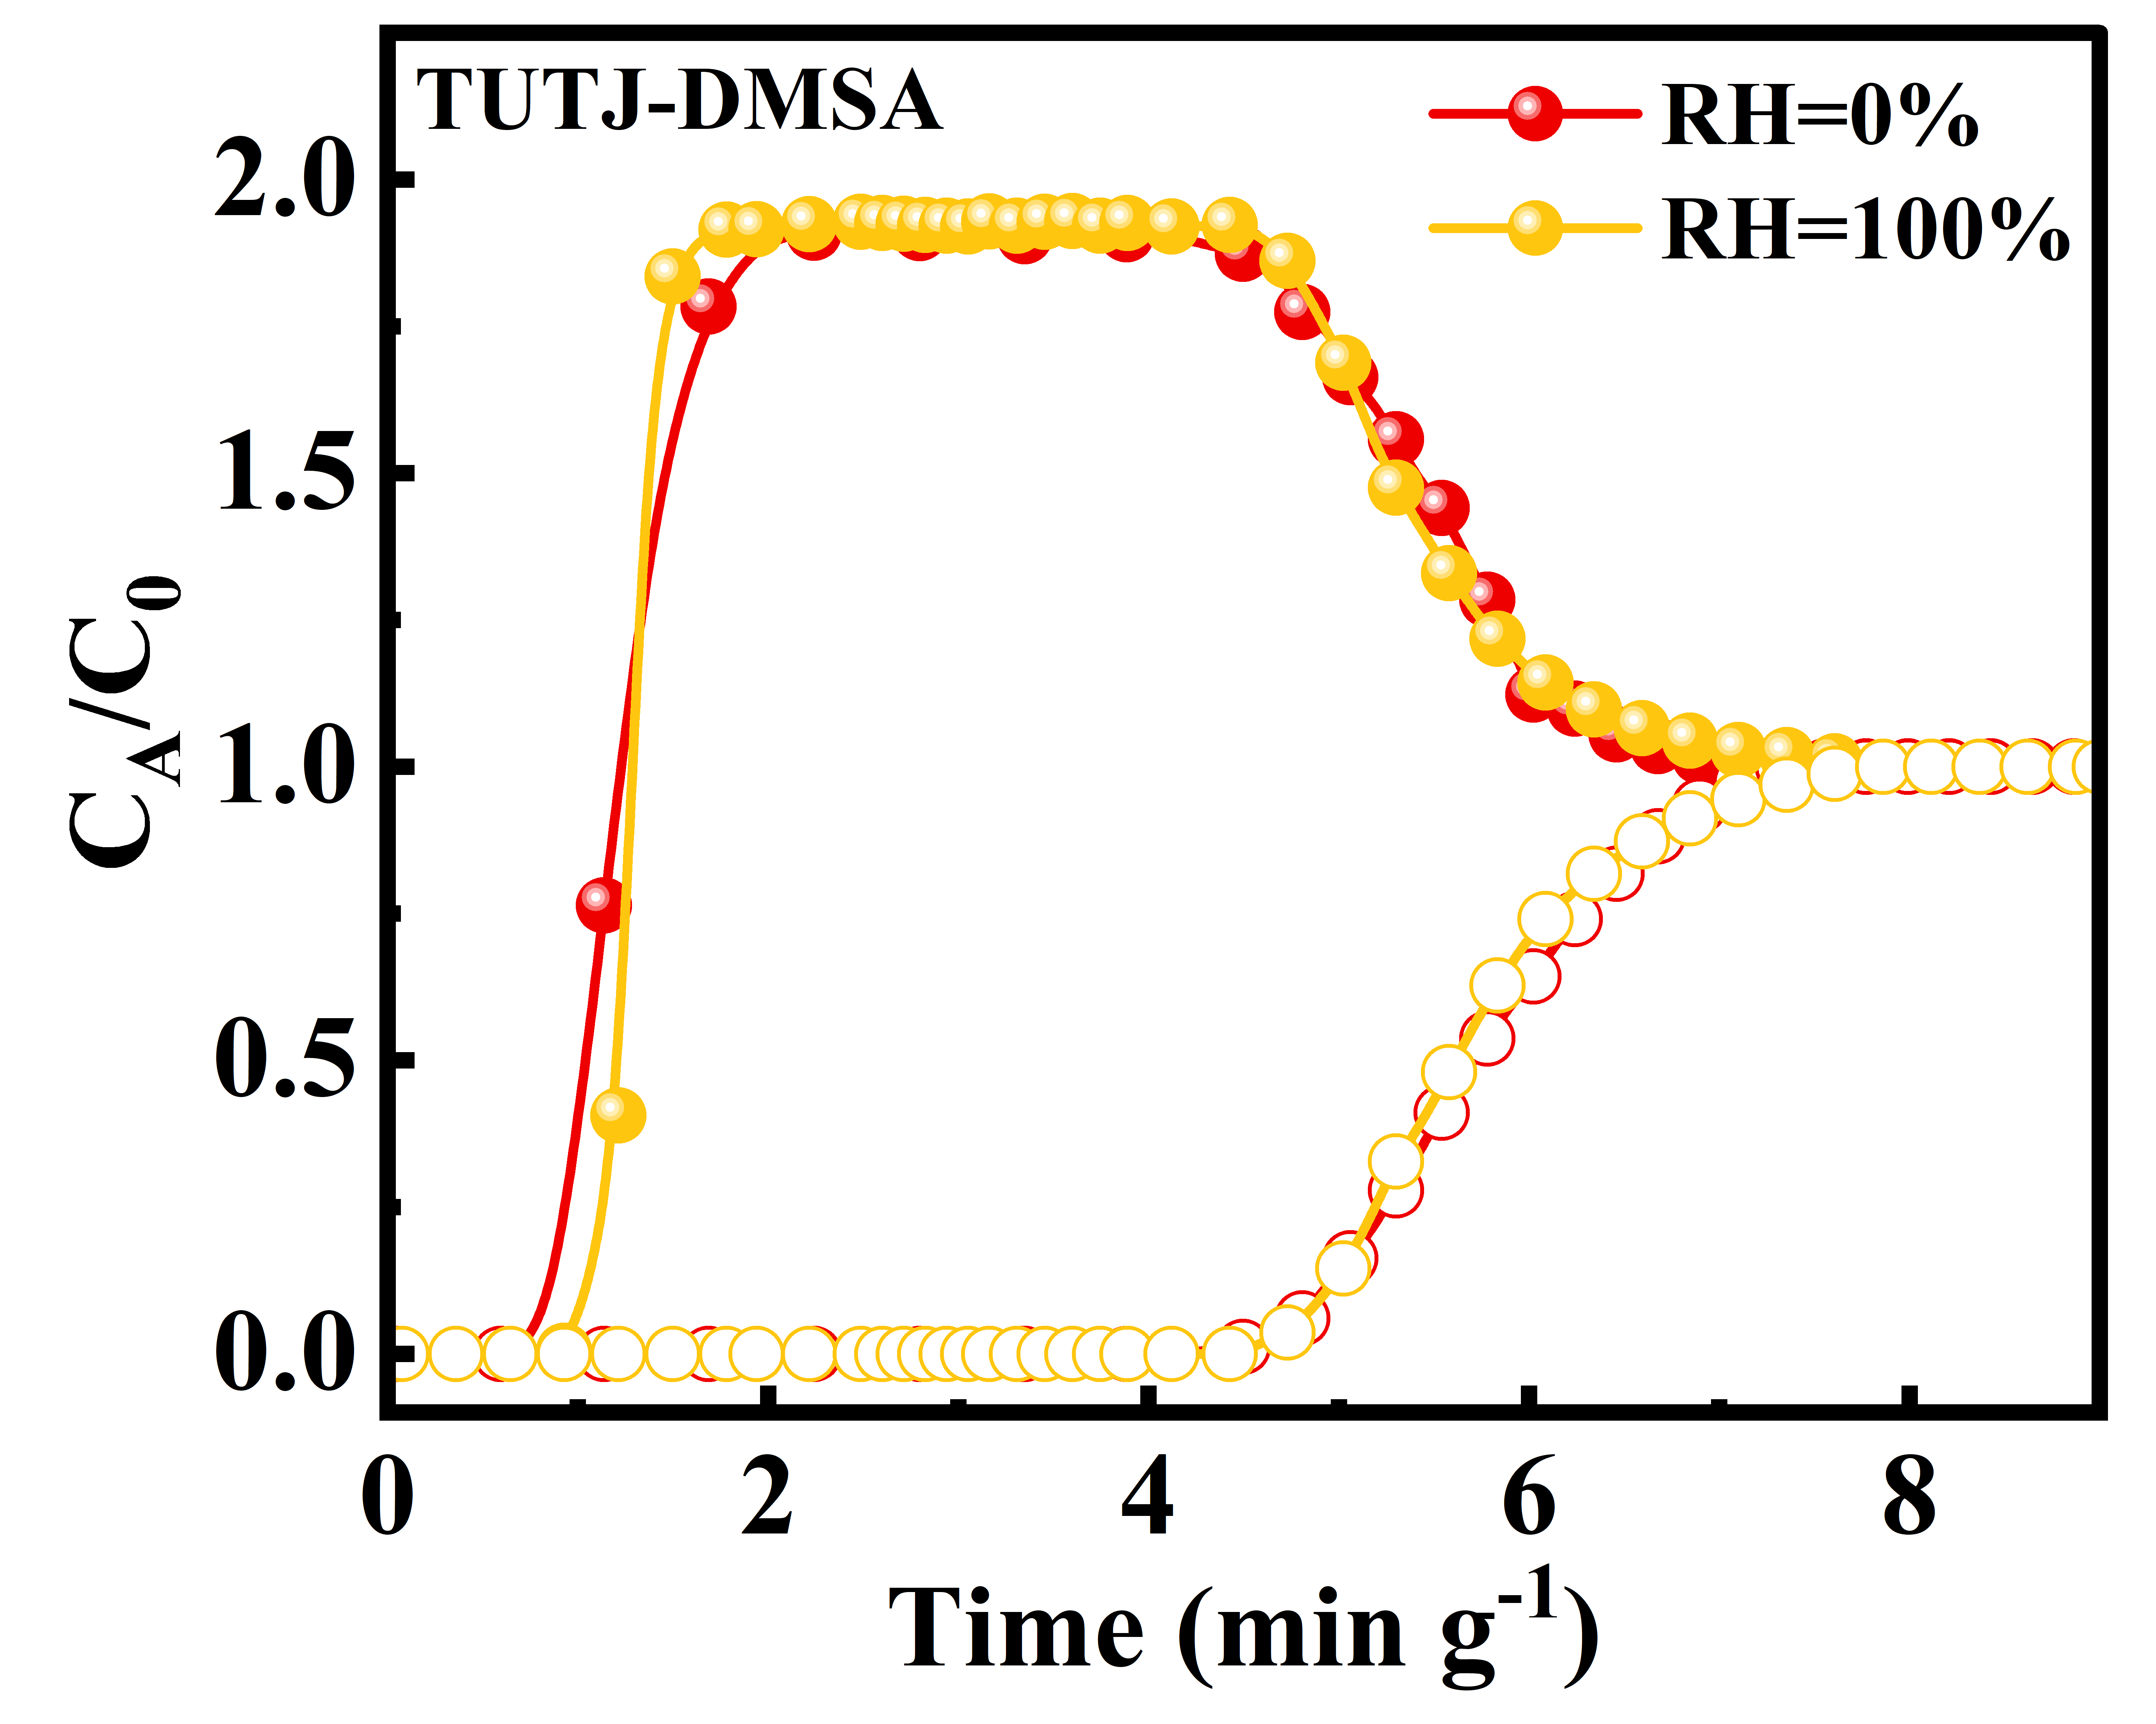


**Supplementary** Figure 48. Breakthrough curves of TUTJ-DMSA at 0% (red) and 100% (yellow) RH at 298 K.


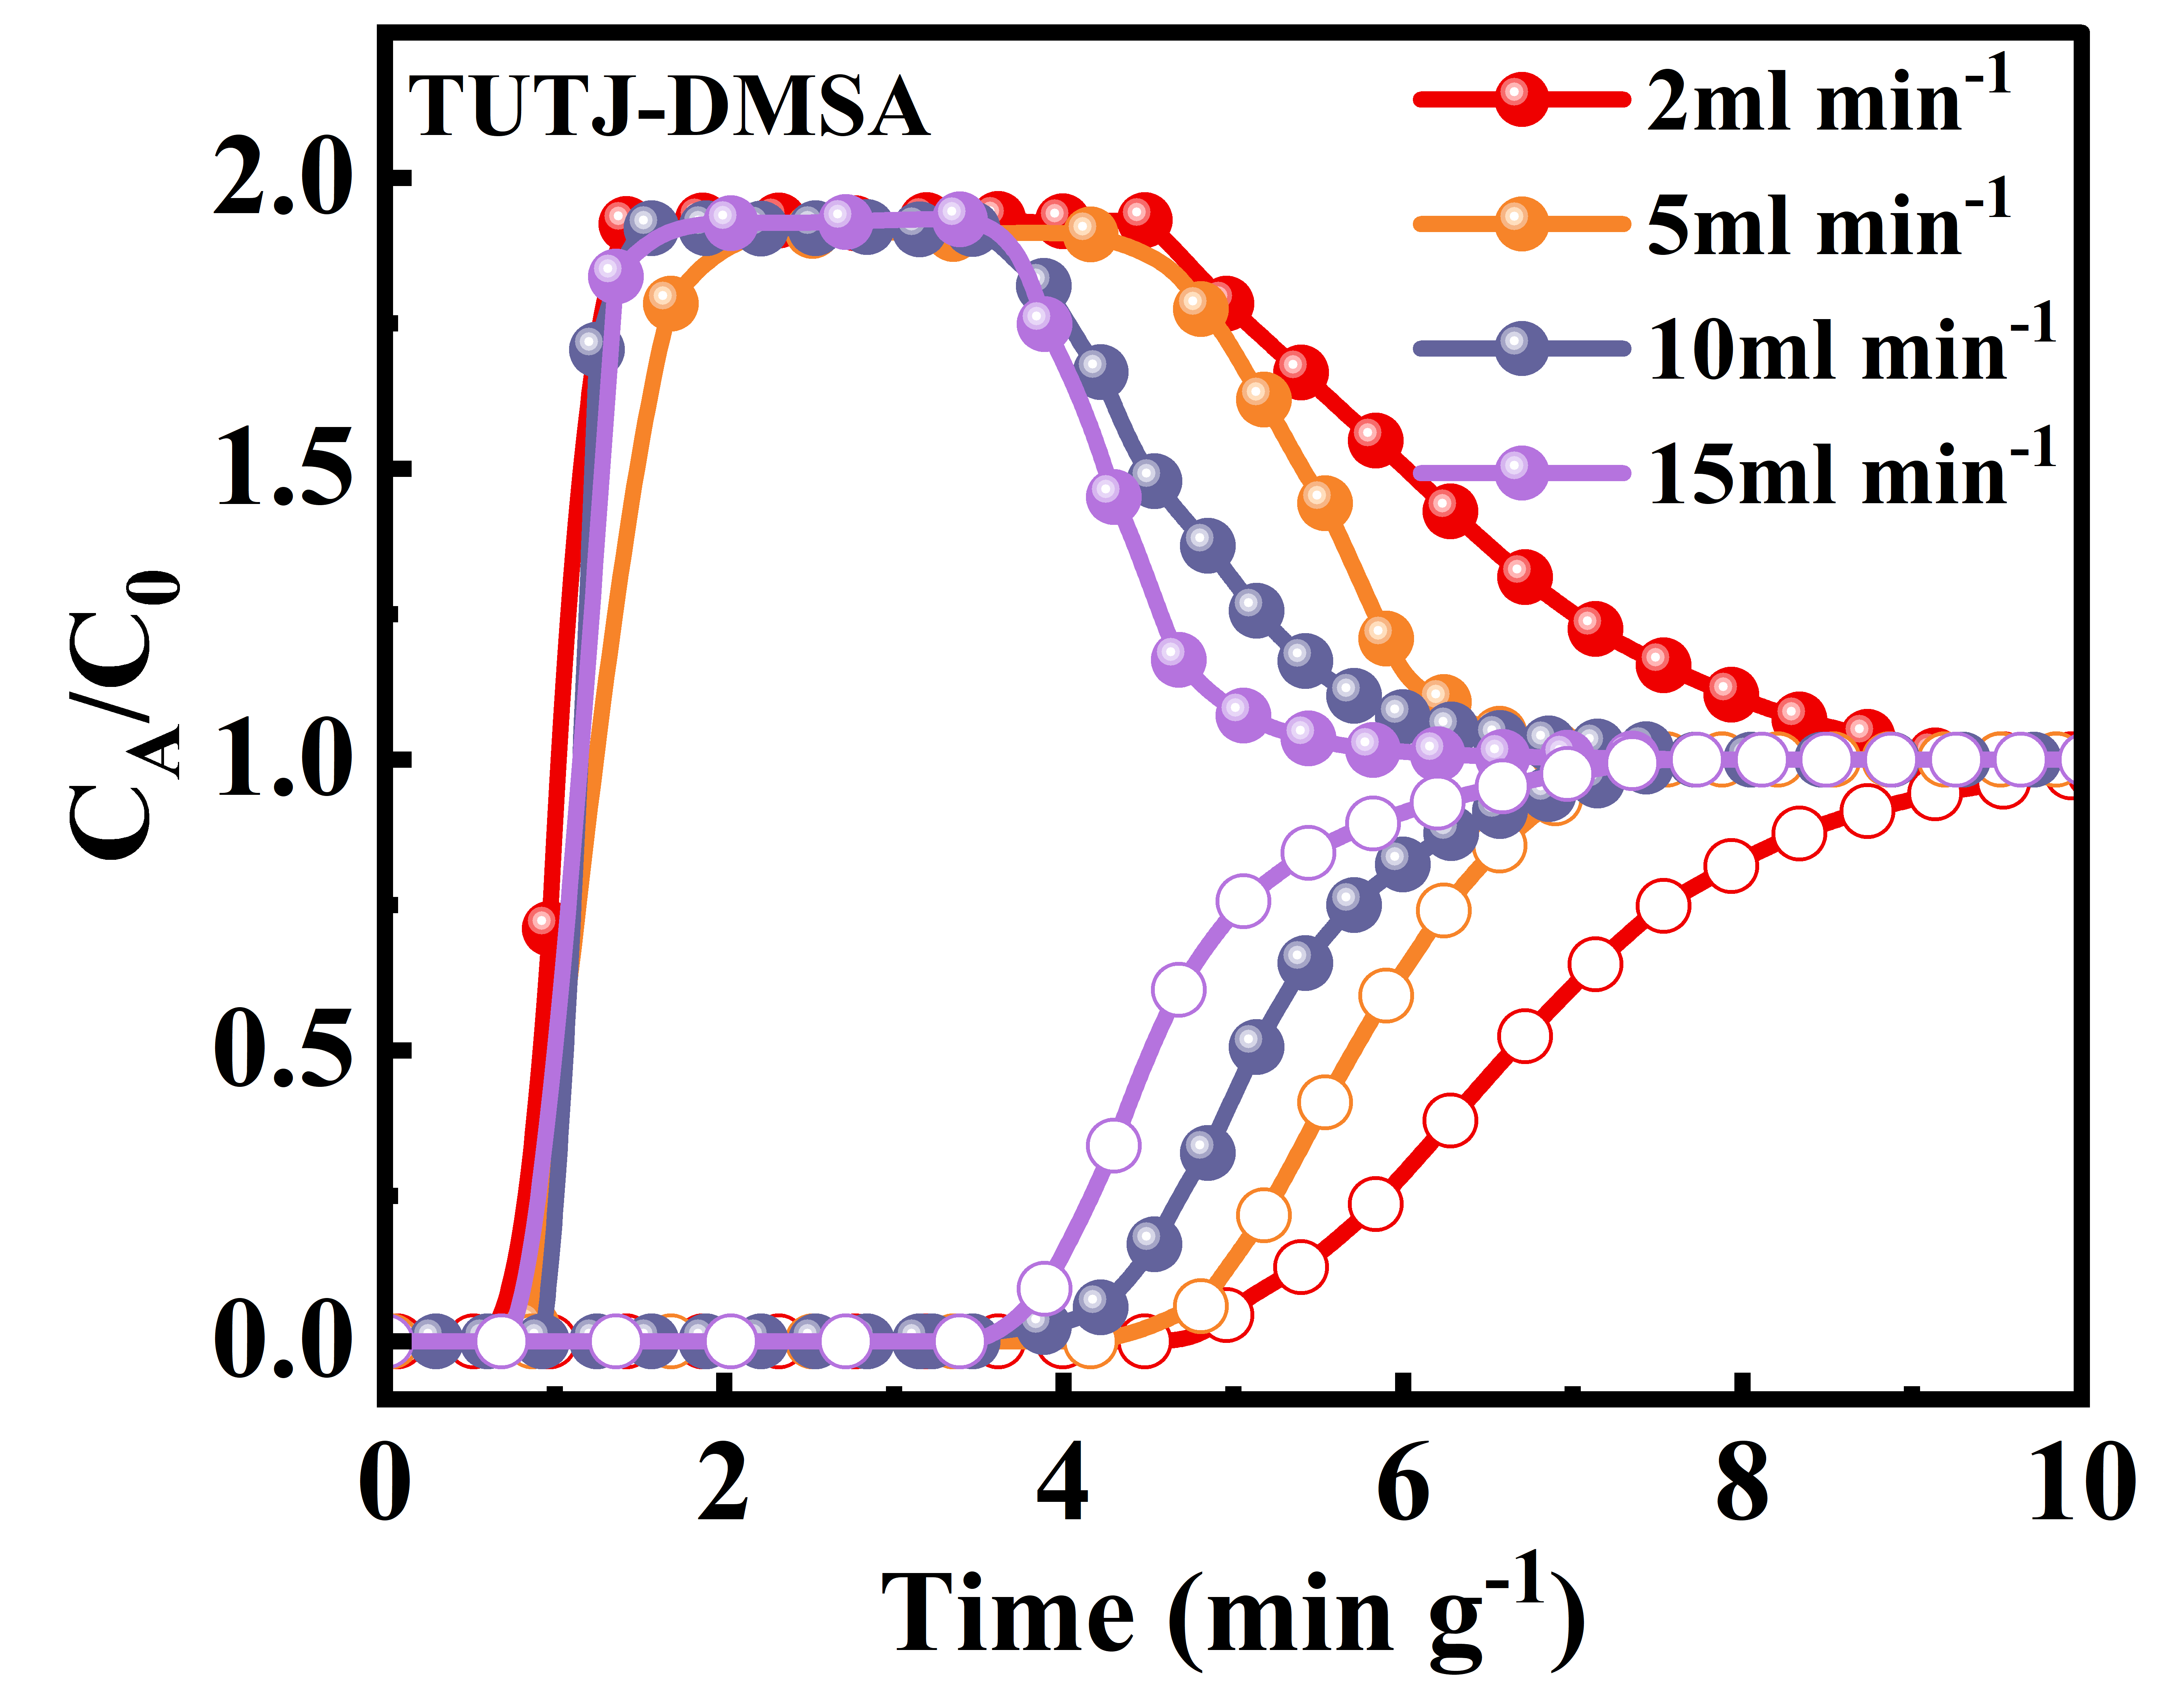


**Supplementary** Figure 49. Breakthrough curves of TUTJ-DMSA at 298 K under different flow rates.


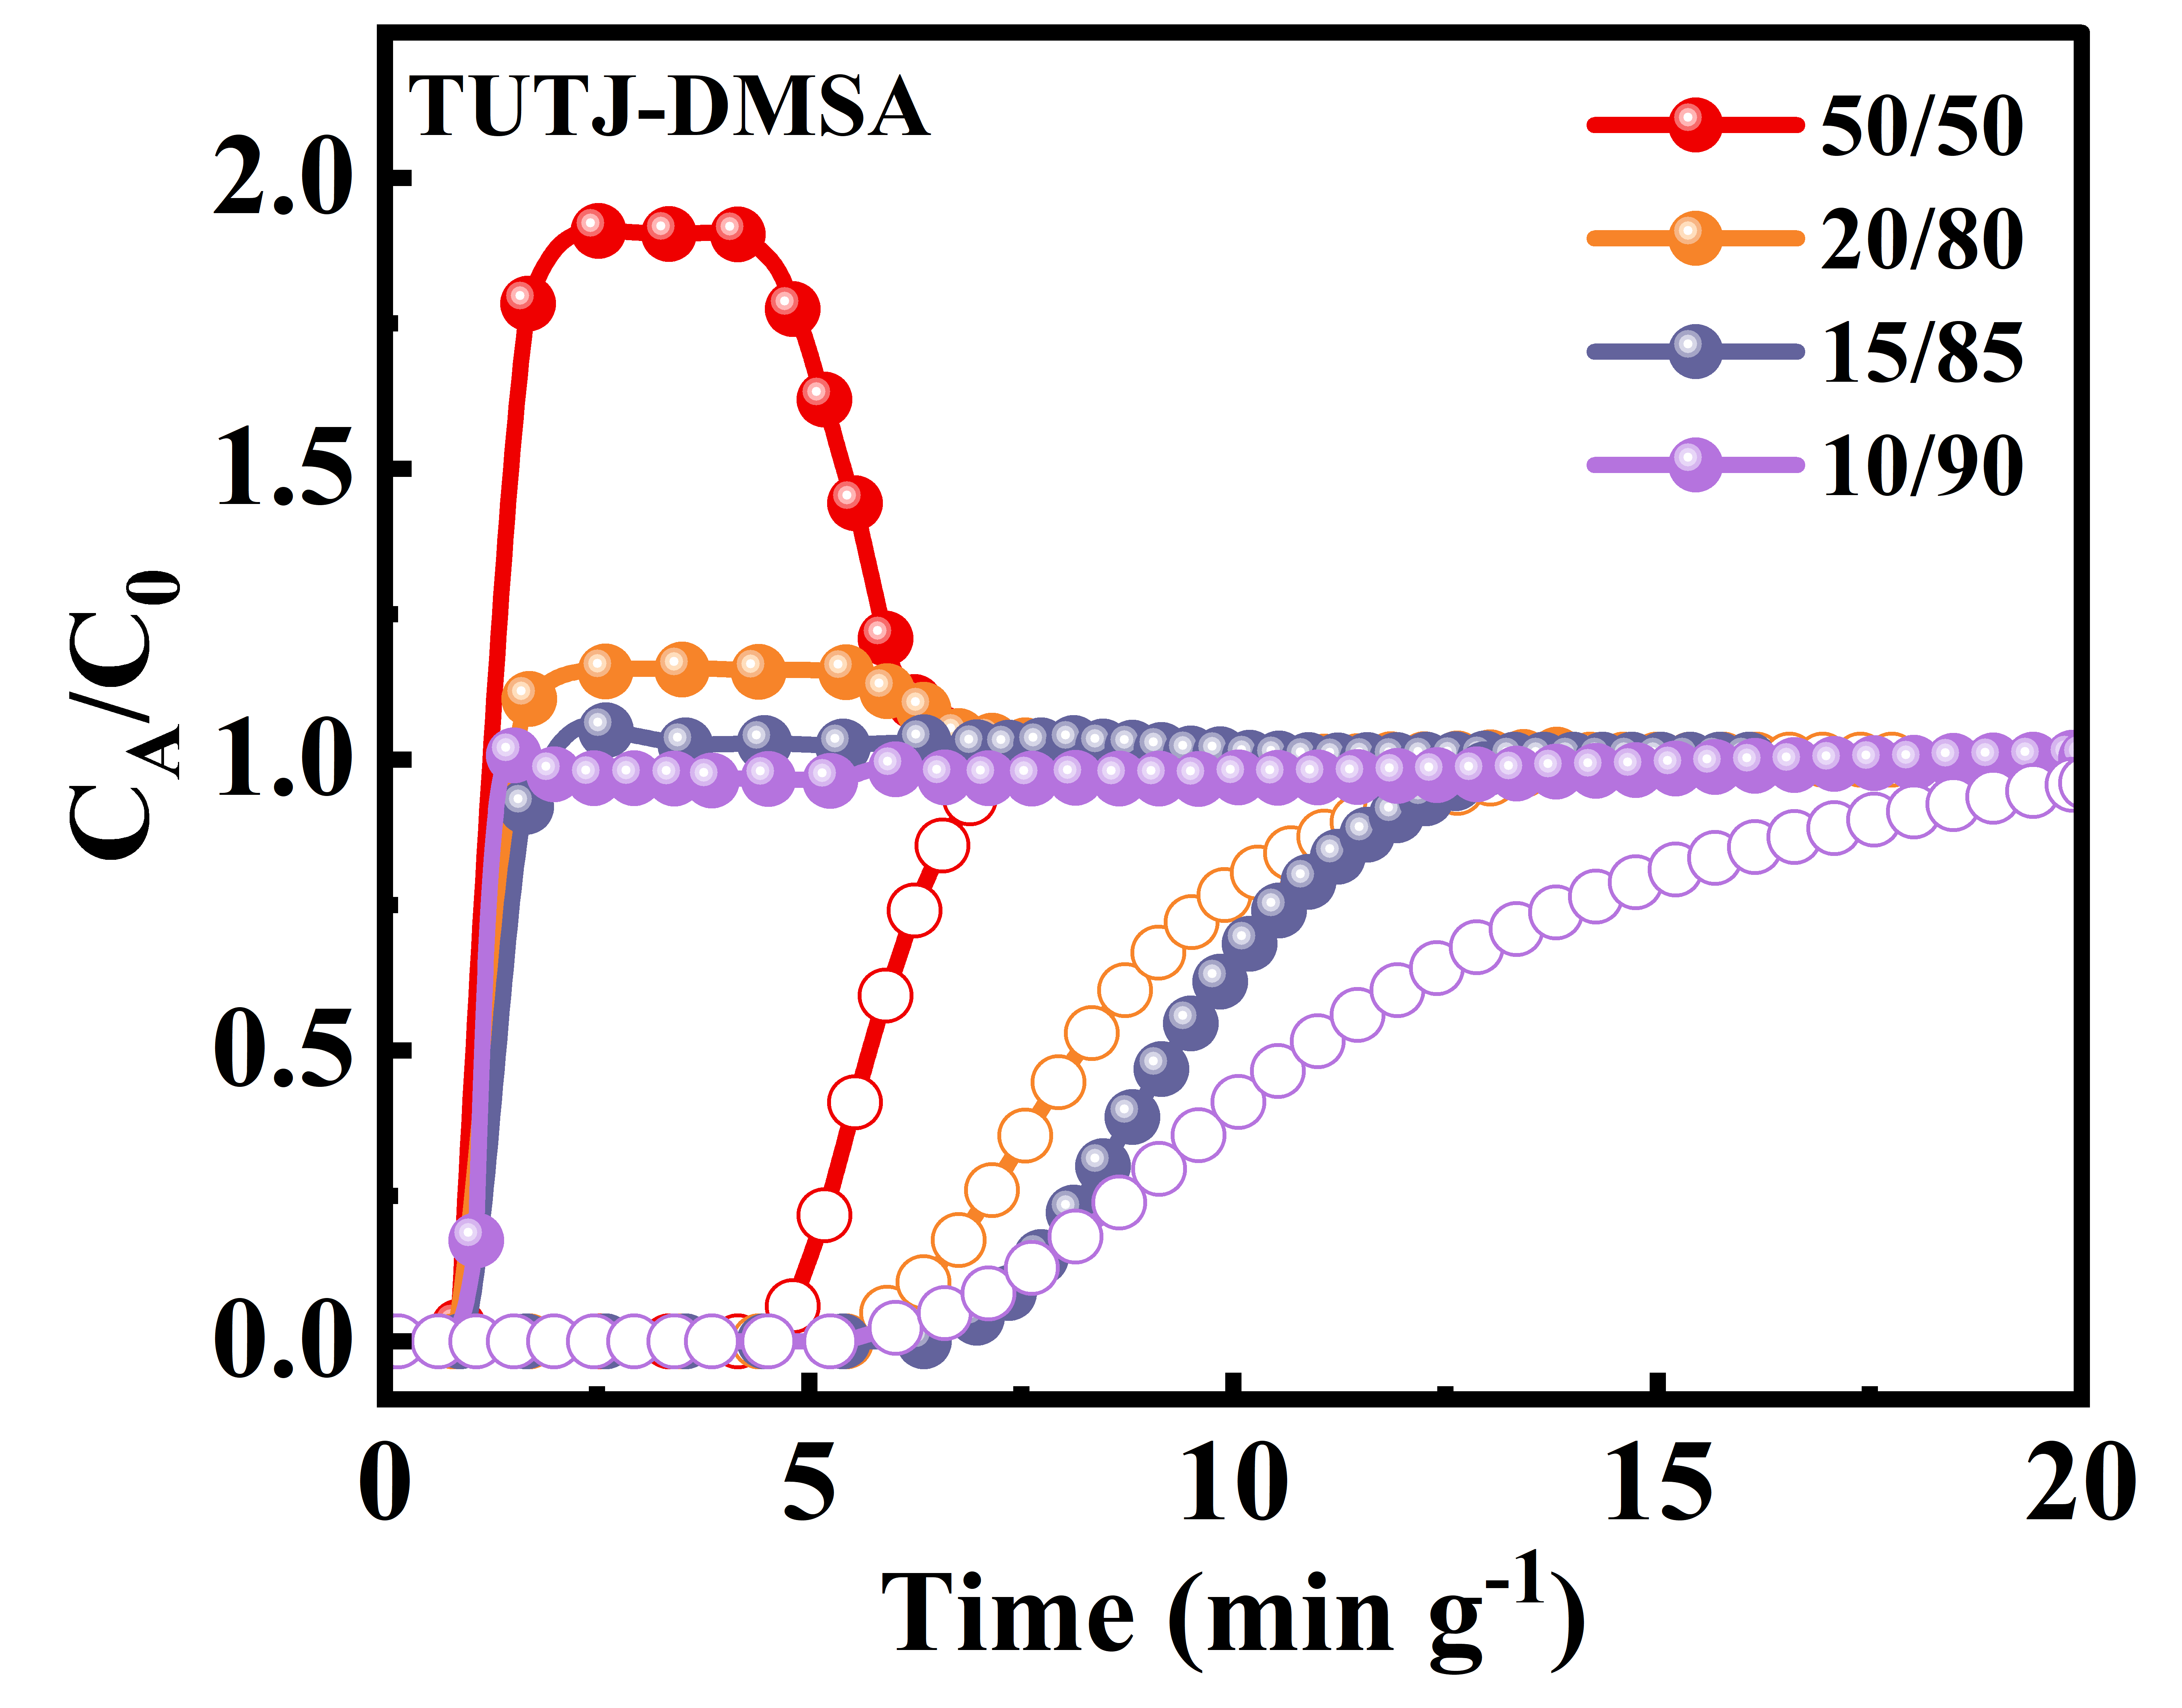


**Supplementary** Figure 50. Breakthrough curves of TUTJ-DMSA at 298 K with different CH4/N2 feed ratio.

**Supplementary Table 1** Crystallographic Data for Coordination Containers TUTJ-SA, TUTJ-DMSA and TUTJ-PhSA.

| **Parameter** | **TUTJ-SA** | **TUTJ-DMSA** | **TUTJ-PhSA** |
| --- | --- | --- | --- |
| empirical formula | C98H110Co8O42S8 | C107H136Co8O45S8 | C128H152Co8N4O42S8 |
| formula weight | 2687.78 | 2870.08 | 3146.46 |
| temperature (K) | 193 | 217 | 193 |
| wavelength (Å) | 1.54178 | 1.54178 | 1.54178 |
| crystal system | Triclinic | Orthorhombic | Tetragonal |
| space group | *P-1* | *Cmca* | *I4/mmm* |
| a (Å) | 12.5702(3) | 23.2078(19) | 16.2763(3) |
| b (Å) | 13.3715(3) | 23.5946(19) | 16.2763(3) |
| c (Å) | 21.2980(4) | 29.377(3) | 31.0684(11) |
| α (°) | 84.105(1) | 90 | 90 |
| β (°) | 84.441(1) | 90 | 90 |
| γ (°) | 65.775(1) | 90 | 90 |
| V (Å³) | 3241.41(13) | 16086(2) | 8230.6(4) |
| Z | 1 | 4 | 2 |
| D(calcd) (g cm-3) | 1.377 | 1.185 | 1.270 |
| μ (Mo *Kα*) (mm-1) | 9.644 | 7.817 | 7.679 |
| F (000) | 1378.0 | 5928.0 | 3256.0 |
| θmax (°) | 68.390 | 68.557 | 68.362 |
| h,k,lmax | 15,16,25 | 28,28,35 | 19,19,37 |
| Nref | 11895 | 7614 | 3871 |
| Npar | 787 | 502 | 323 |
| S | 1.067 | 1.165 | 1.141 |
| R(reflections) | 0.0478(8821) | 0.1131(3855) | 0.1096(1983) |
| wR2(reflections) | 0.1387(11829) | 0.3338(7448) | 0.3445(3836) |

**Supplementary Table** 2 The atomic charges are derived from Mulliken population analysis of the fully optimized ligand geometries, reflecting the electronic charge distribution characteristics of each ligand.

| TUTJ-SA Ligand | | TUTJ-DMSA Ligand | | TUTJ-PhSA Ligand | |
| --- | --- | --- | --- | --- | --- |
| 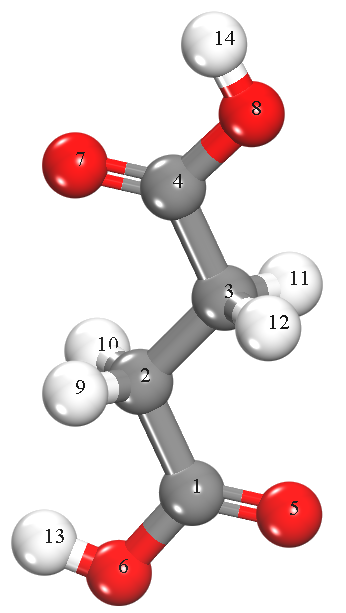 | | 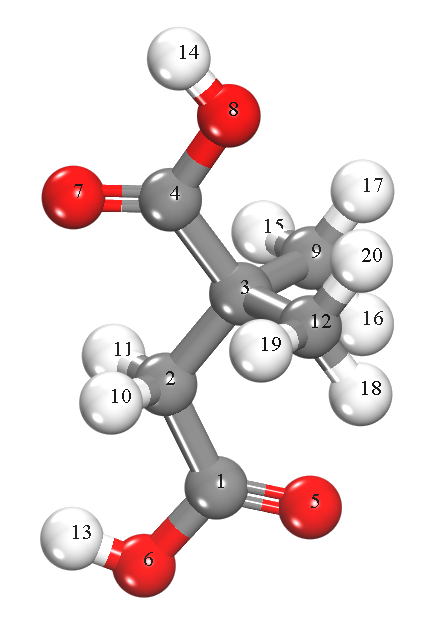 | | 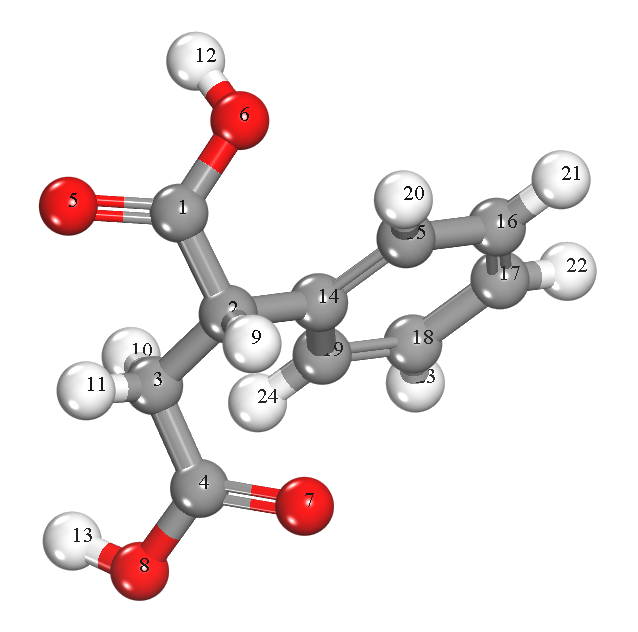 | |
| atom | charge | atom | charge | atom | charge |
| C (1) | 0.515 | C (1) | 0.519 | C (1) | 0.516 |
| C (2) | -0.276 | C (2) | -0.24 | C (2) | -0.18 |
| C (3) | -0.233 | C (3) | -0.231 | C (3) | -0.249 |
| C (4) | 0.497 | C (4) | 0.543 | C (4) | 0.488 |
| O (5) | -0.378 | O (5) | -0.388 | O (5) | -0.494 |
| O (6) | -0.413 | O (6) | -0.409 | O (6) | -0.457 |
| O (7) | -0.412 | O (7) | -0.418 | O (7) | -0.43 |
| O (8) | -0.401 | O (8) | -0.403 | O (8) | -0.463 |
| H (9) | 0.135 | C (9) | -0.208 | H (9) | 0.181 |
| H (10) | 0.135 | H (10) | 0.133 | H (10) | 0.146 |
| H (11) | 0.141 | H (11) | 0.136 | H (11) | 0.181 |
| H (12) | 0.141 | C (12) | -0.209 | H (12) | 0.349 |
| H (13) | 0.269 | H (13) | 0.268 | H (13) | 0.324 |
| H (14) | 0.281 | H (14) | 0.284 | C (14) | 0.025 |
|  |  | H (15) | 0.08 | C (15) | -0.077 |
|  |  | H (16) | 0.123 | C (16) | -0.091 |
|  |  | H (17) | 0.11 | C (17) | -0.098 |
|  |  | H (18) | 0.123 | C (18) | -0.101 |
|  |  | H (19) | 0.078 | C (19) | -0.074 |
|  |  | H (20) | 0.109 | H (20) | 0.11 |
|  |  |  |  | H (21) | 0.109 |
|  |  |  |  | H (22) | 0.098 |
|  |  |  |  | H (23) | 0.098 |
|  |  |  |  | H (24) | 0.09 |

**Supplementary Table** 3 Computational packing configuration analysis of TUTJ-series MOFs.

|  | Vertical | Synclinal | Staggered | Extended Synclinal | Perpendicular Cross |
| --- | --- | --- | --- | --- | --- |
| TUTJ-SA | 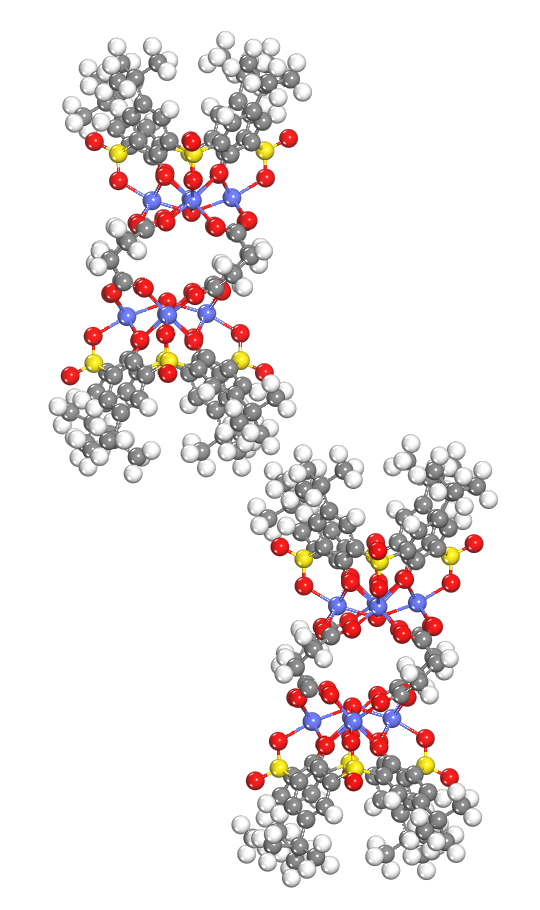 | 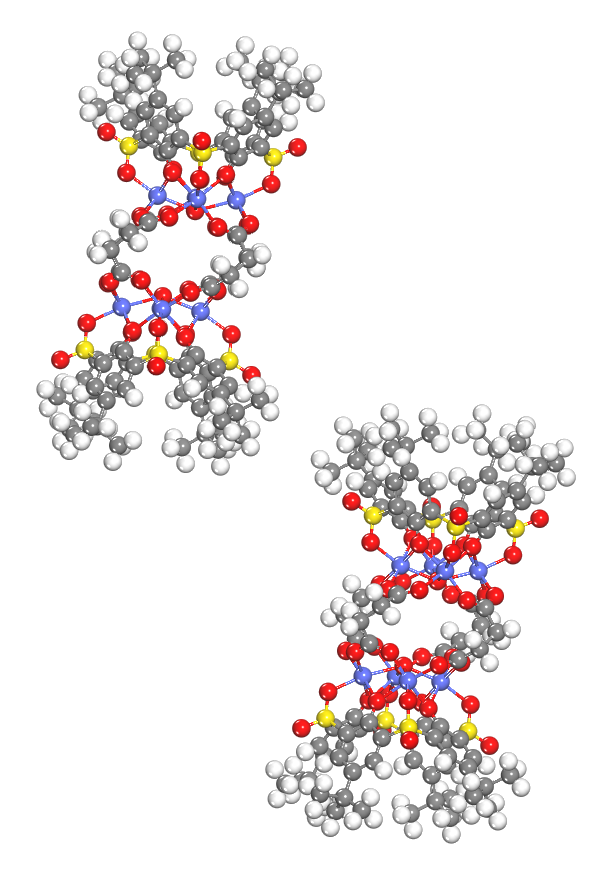 | 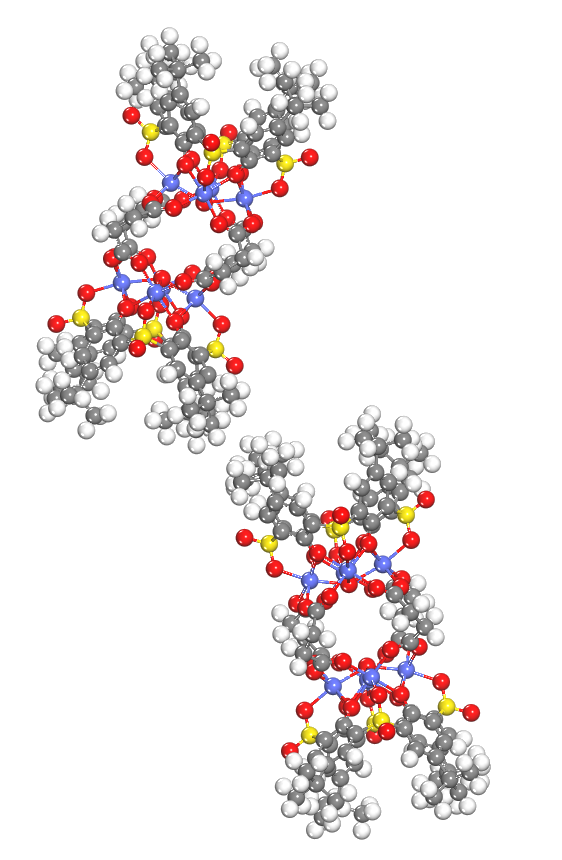 | 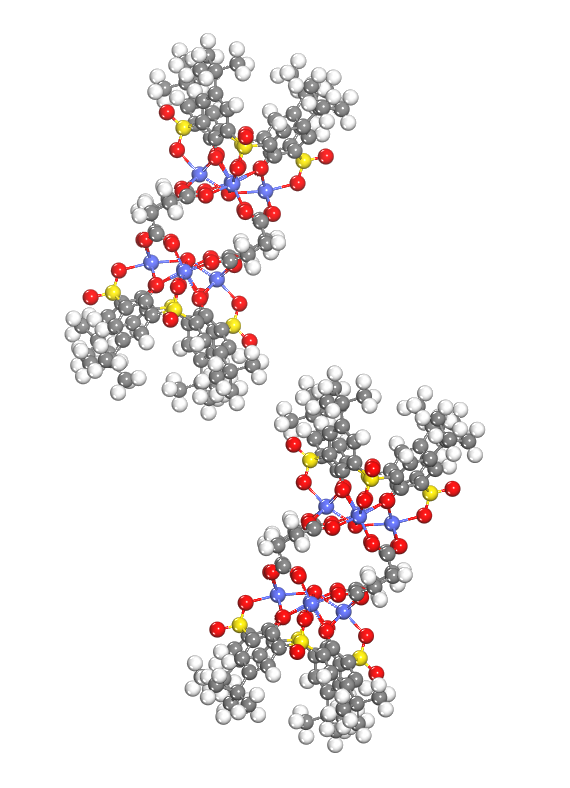 | 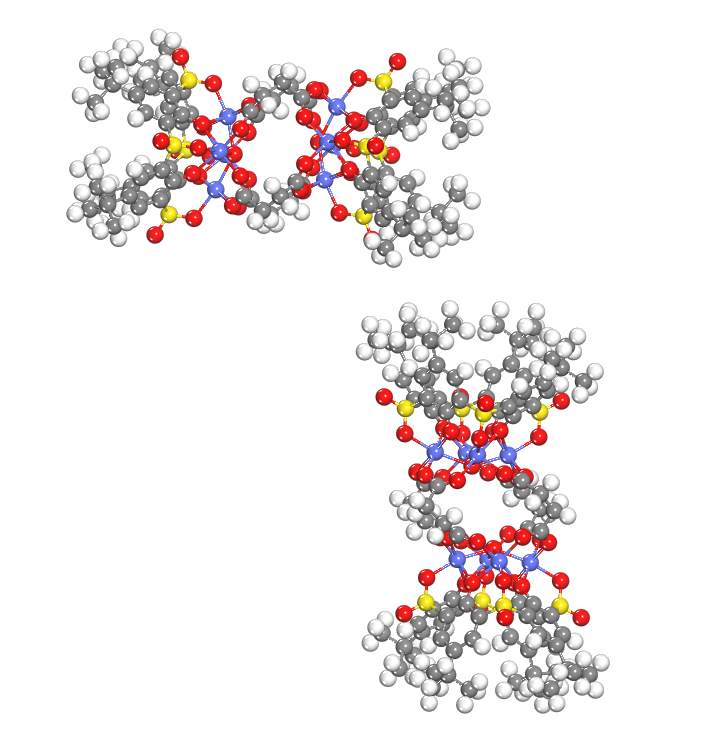 |
| TUTJ-DMSA | 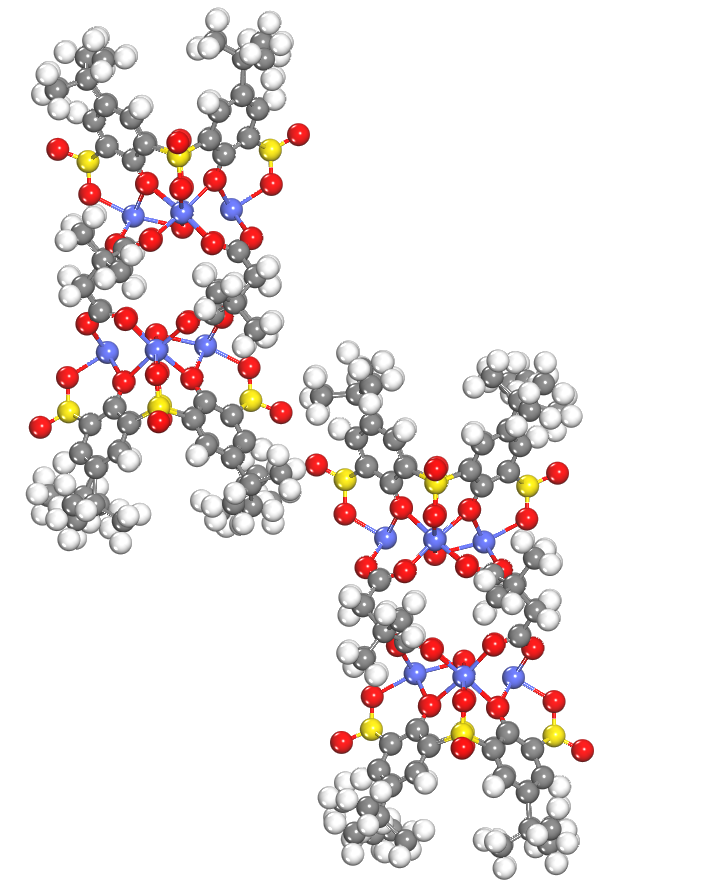 | 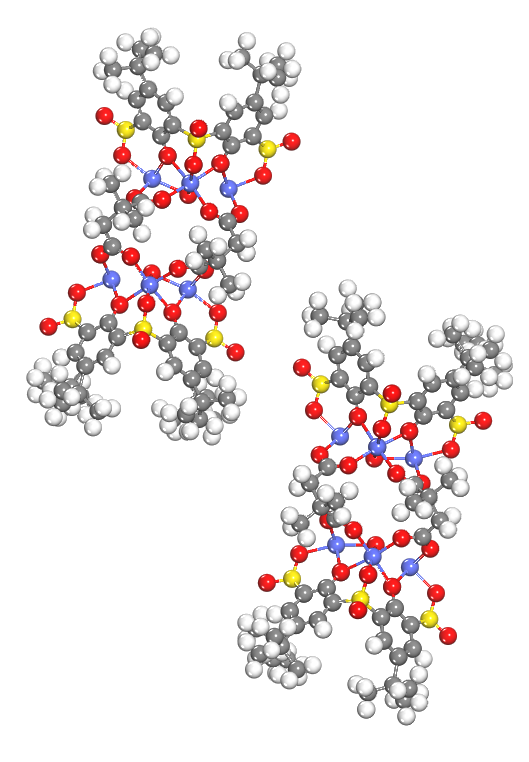 | 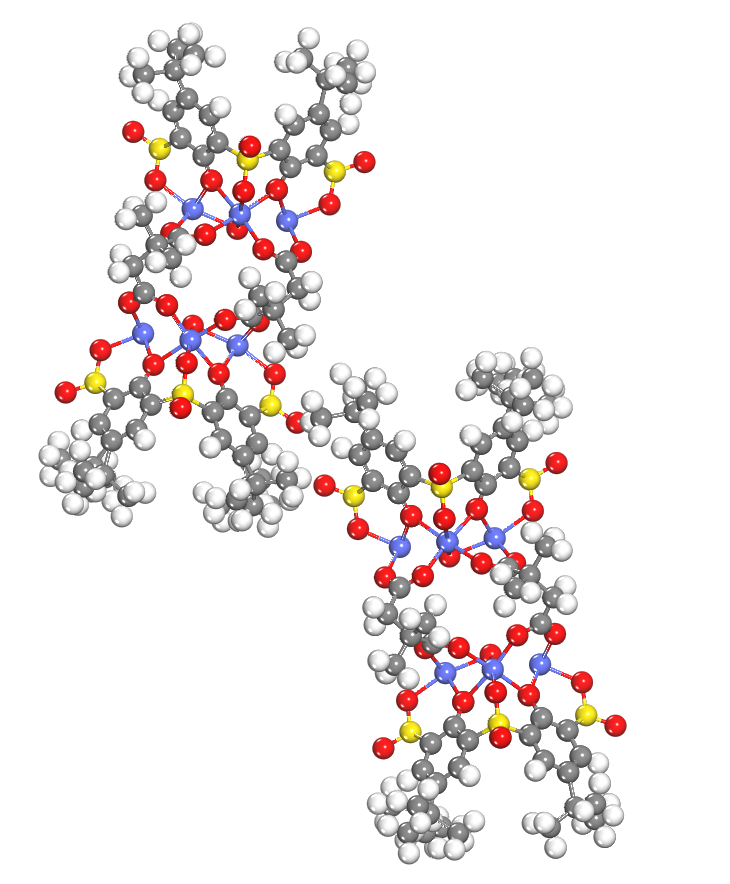 | 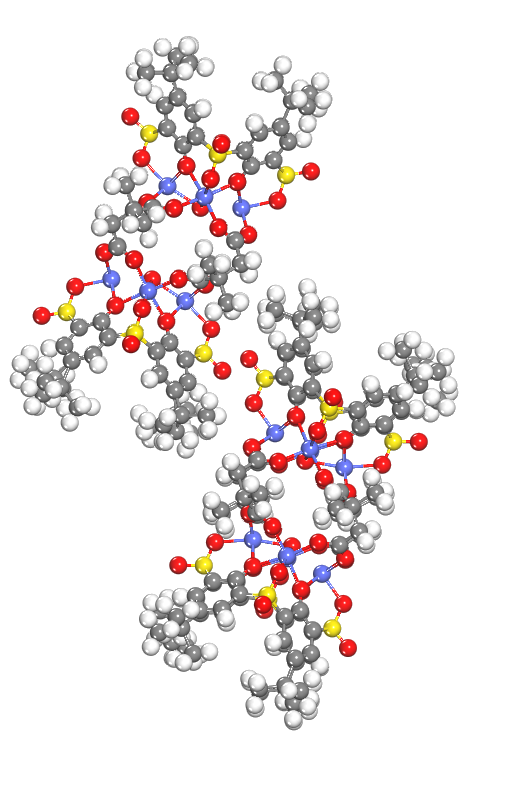 | 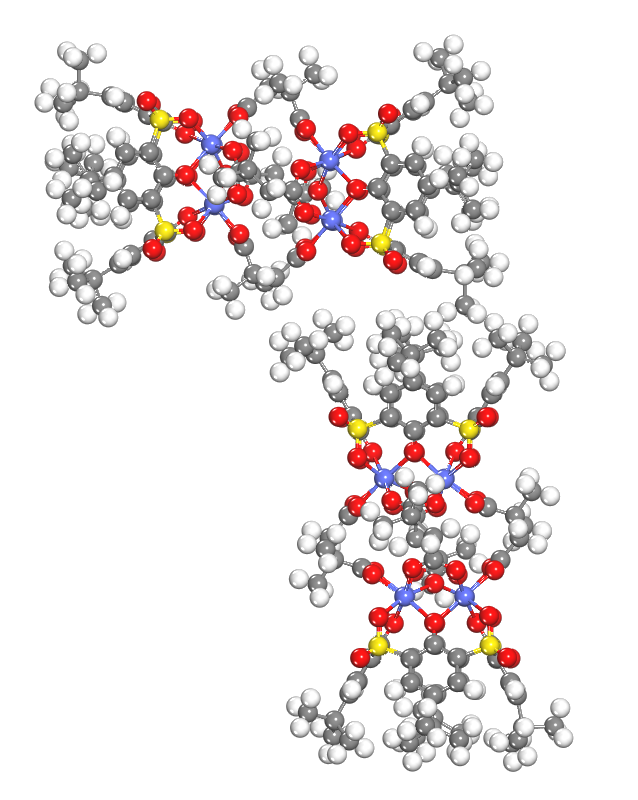 |
| TUTJ-PhSA | 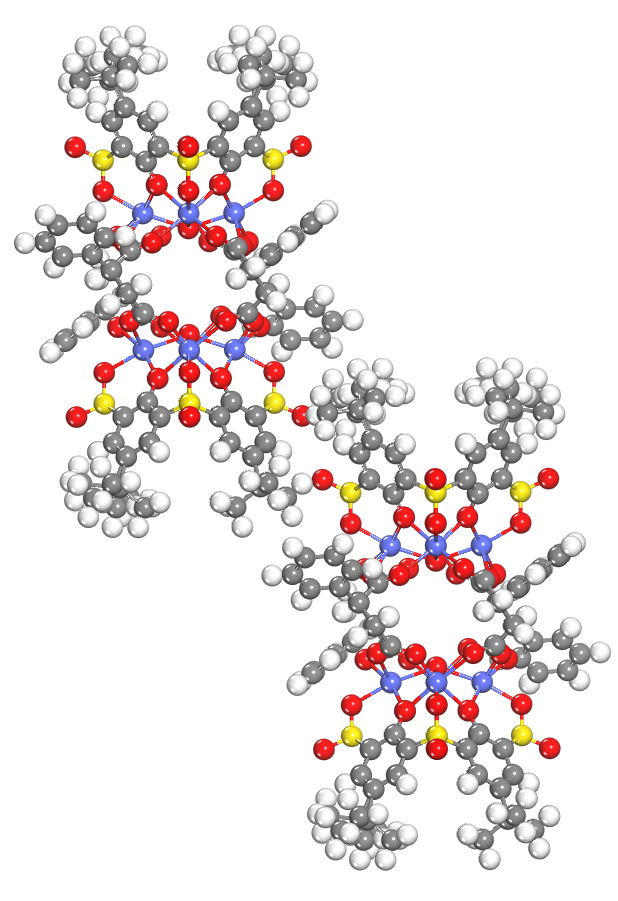 | 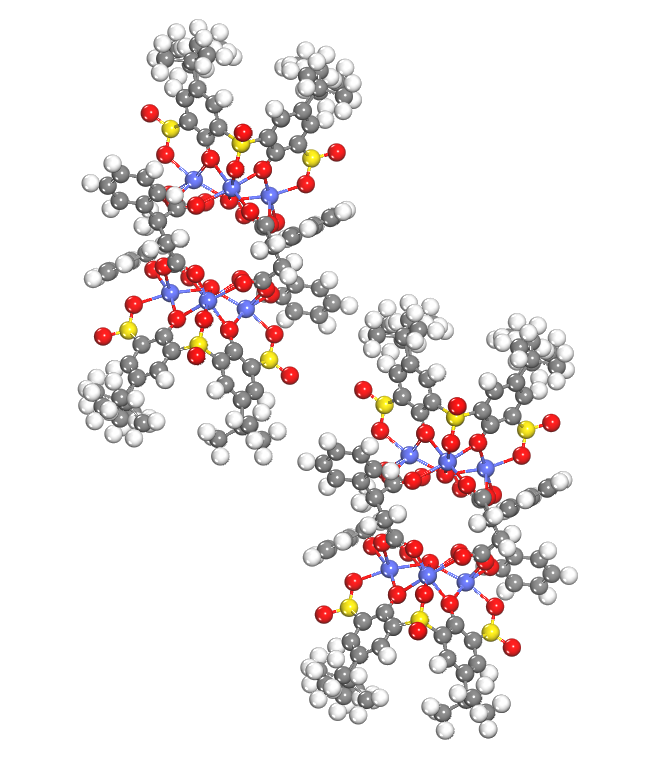 | 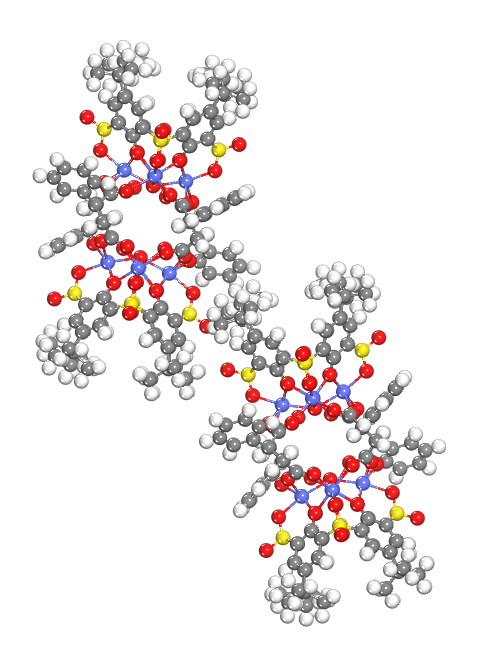 | 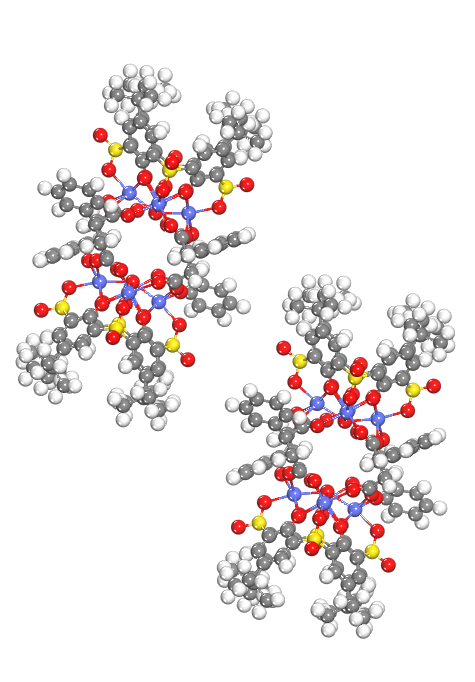 | 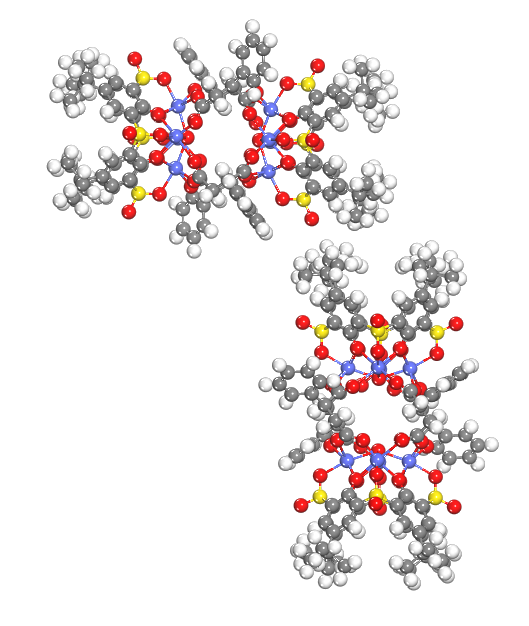 |

**Supplementary Table** 4 DFT-calculated total energies and relative energies of various conformational models for TUTJ-SA, TUTJ-DMSA, and TUTJ-PhSA. The most stable conformation (lowest total energy) for each framework is highlighted in red.

| Name | Models | Energy (eV) | ΔE (eV) | ΔE (kJ mol-1) |
| --- | --- | --- | --- | --- |
| TUTJ-SA | Vertical | -92865.70 | 0.48 | 46.76 |
| Synclinal | -92865.87 | 0.31 | 30.00 |
| Staggered | -92865.86 | 0.32 | 30.86 |
| Extended Synclinal | -92866.18 | 0.00 | 0.00 |
| Perpendicular Cross | -92865.96 | 0.23 | 21.91 |
| TUTJ-DMSA | Vertical | -95874.71 | 0.23 | 21.83 |
| Synclinal | -95874.28 | 0.66 | 63.40 |
| Staggered | -95874.94 | 0.00 | 0.00 |
| Extended Synclinal | -95869.24 | 5.70 | 549.99 |
| Perpendicular Cross | -95871.50 | 3.44 | 331.96 |
| TUTJ-PhSA | Vertical | -87386.40 | 0.00 | 0.00 |
| Synclinal | -87385.69 | 0.71 | 68.57 |
| Staggered | -87385.38 | 1.02 | 98.57 |
| Extended Synclinal | -87385.80 | 0.60 | 57.88 |
| Perpendicular Cross | -87385.53 | 0.87 | 84.03 |

**Supplementary Table** 5 BET surface areas and 77 K N2 uptakes of TUTJ-series MOFs and reference porous materials.

| Material | BET surface area  (m2 g-1) | 77 K N2 uptake  (cm3 g-1) | Ref. |
| --- | --- | --- | --- |
| TUTJ-SA | 35 | 48 | This work |
| TUTJ-DMSA | 592 | 207 |
| TUTJ-PhSA | 28 | 32 |
| Cu12a-π | 32 | ~70 | 1 |
| Co-NDC | 120 | 98 | 2 |
| Co-NDC-Br | 300 | 152 |
| 2-Co | 247 | ~88 | 3 |
| Co-CAM | 317 | ~127 | 4 |

**Supplementary Table** 6 Comparison of the adsorptive separation performance between TUTJ-series MOFs and other reported hydrophobic adsorbents.

| Adsorbent | CH4/N2 selectivity | Uptake  (cm3 g-1) | | Ref. |
| --- | --- | --- | --- | --- |
| CH4 | N2 |
| **TUTJ-DMSA** | **9.2** | **16.5** | **4.9** | **This work** |
| TUTJ-SA | 1.8 | 11.2 | 3.3 |
| TUTJ-PhSA | 8.6 | 2.1 | 0.9 |
| TUTQ-1Ni | 11.0 | 19.2 | 4.4 | 5 |
| NKMOF-8-Me | 9.0 | 39.5 | 7.0 | 6 |
| Al-FUM-Me | 8.6 | 27.2 | 5.6 | 7 |
| DMOF-A2 | 7.2 | 37.0 | 8.8 | 8 |
| TUT-100 | 6.3 | 27.5 | 5.0 | 9 |
| MIL-120Al | 6.0 | 33.7 | 10.5 | 10 |
| CALF-20 | 3.6 | 24.8 | 8.9 | 11 |
| Zn-DMOF-TM | 4.6 | 30.2 | 7.6 | 12 |
| Co-DMOF-TM | 4.9 | 30.9 | 8.2 |
| Ni-DMOF-TM | 6.7 | 34.9 | 8.3 |

N.R. represents not reported.

**Supplementary Table** 7 The fitting parameters of the DSL model for CH4 and N2 adsorption on TUTJ-2Ni and TUTJ-3Ni.

| **Materials** | **Temperature**  **(K)** | **Gas** | **q1**  **(cm3 g-1)** | **b1**  **(bar-1)** | **n1** | **q2**  **(cm3 g-1)** | **b2**  **(bar-1)** | **n2** | **R2** |
| --- | --- | --- | --- | --- | --- | --- | --- | --- | --- |
| TUTJ-SA | 273 | CH4 | 5.45 | 0.85 | 0.66 | 0.25 | 63.81 | 0.75 | 0.9997 |
| N2 | 0.82 | 9.89 | 0.28 | 0.28 | 26.78 | 0.64 | 0.9996 |
| 298 | CH4 | 5.81 | 0.52 | 0.88 | 0.09 | 18888.01 | 0.05 | 0.9998 |
| N2 | 0.56 | 28.73 | 0.20 | 0.50 | 7.88 | 1.25 | 0.9996 |
| 313 | CH4 | 0.44 | 5.86 | 0.70 | 0.75 | 8.24 | 0.28 | 0.9996 |
| N2 | 0.11 | 195.39 | 0.39 | 0.21 | 4682.66 | 0.10 | 0.9021 |
| TUTJ-DMSA | 273 | CH4 | 6.97 | 1.46 | 0.52 | 19.45 | 6.99 | 0.99 | 0.9999 |
| N2 | 4.54 | 2.11 | 0.42 | 7.07 | 2.06 | 1.04 | 0.9999 |
| 298 | CH4 | 17.18 | 2.86 | 0.97 | 6.62 | 1.35 | 0.52 | 0.9999 |
| N2 | 8.00 | 1.05 | 0.59 | 0.96 | 8.60 | 0.92 | 0.9999 |
| 313 | CH4 | 0.05 | 702663.3 | 0.06 | 27.25 | 0.88 | 1.01 | 0.9999 |
| N2 | 0.36 | 74.37 | 0.15 | 8.36 | 0.48 | 0.95 | 0.9999 |
| TUTJ-PhSA | 273 | CH4 | 5.53 | 30.49 | 0.75 | 13.42 | 1.55 | 1.00 | 0.9999 |
| N2 | 4.15 | 1.46 | 0.40 | 3.55 | 3.56 | 0.86 | 0.9999 |
| 298 | CH4 | 14.68 | 2.42 | 0.94 | 1.07 | 3.88 | 0.24 | 0.9999 |
| N2 | 0.09 | 159137.02 | 0.09 | 15.11 | 0.27 | 0.98 | 0.9999 |
| 313 | CH4 | 0.07 | 1359648 | 0.16 | 18.87 | 0.90 | 0.98 | 0.9999 |
| N2 | 0.17 | 309.88 | 0.10 | 4.92 | 0.57 | 0.88 | 0.9995 |

# References

1 Zhang, C. *et al.* Dynamic and transformable Cu12 cluster-based C-H···π-stacked porous supramolecular frameworks. *Nat. Commun.* **14**, 6413 (2023).

2 Liu, J.-Y. *et al.* Iodine Adsorption via Porous Molecular Solids Based on Coordination Containers Derived from Naphthalene-1,8-dicarboxylate. *Cryst. Growth Des.* **22**, 3182-3189 (2022).

3 Sun, C.-Z., Sheng, T.-P., Dai, F.-R. & Chen, Z.-N. Sulfonylcalixaren-Based ortho-Dicarboxylate-Bridged Coordination Containers for Guest Encapsulation and Separation. *Cryst. Growth Des.* **19**, 1144-1148 (2019).

4 Su, K. *et al.* Bridging different Co4–calix[4]arene building blocks into grids, cages and 2D polymers with chiral camphoric acid. *CrystEngComm* **17**, 1750-1753 (2015).

5 Zhao, Z. *et al.* Hydrophobic metal-organic framework Featuring multiple O/S active sites for efficient CH4/N2 separation under humid conditions. *Sep. Purif. Technol.* **361**, 131382 (2025).

6 Chang, M. *et al.* Separation of CH4/N2 by an ultra-stable metal–organic framework with the highest breakthrough selectivity. *AIChE J.* **68**, e17794 (2022).

7 Chang, M. *et al.* Enhancing CH4 Capture from Coalbed Methane through Tuning van der Waals Affinity within Isoreticular Al-Based Metal–Organic Frameworks. *ACS Appl. Mater. Interfaces* **14**, 25374-25384 (2022).

8 Li, T. *et al.* Tuning the Pore Environment of MOFs toward Efficient CH4/N2 Separation under Humid Conditions. *ACS Appl. Mater. Interfaces* **14**, 15830-15839 (2022).

9 Liu, J. *et al.* Superhydrophobic zeolitic imidazolate framework with suitable SOD cage for effective CH4/N2 adsorptive separation in humid environments. *AIChE J.* **68**, e17589 (2022).

10 Zhang, F. *et al.* Thermodynamic-kinetic synergistic separation of CH4/N2 on a robust aluminum-based metal-organic framework. *AIChE J.* **69**, e18079 (2023).

11 Su, J. *et al.* Cost-Effective Zinc-Based Metal–Organic Framework for Highly Efficient Methane Purification. *Ind. Eng. Chem. Res.* **63**, 18544-18551 (2024).

12 Li, T. *et al.* Tailoring methyl-functionalized pore environment in pillar-layered MOFs for enhanced CH4/N2 separation under humid conditions. *Chem. Eng. J.* **534**, 175176 (2026).
